# Supplementary material for: Swiss-wide multicentre evaluation and prediction of core outcomes in arthroscopic rotator cuff repair: protocol for the ARCR_Pred cohort study
Source: PubMed Central journal article supplement (PMC8070866; doi:10.1136/bmjopen-2020-045702), 2021-04-22
Supplement: bmjopen-2020-045702.draft_revisions.pdf [file bmjopen-2020-045702.draft_revisions.pdf]

# BMJ Open

BMJ Open is committed to open peer review. As part of this commitment we make the peer review history of every article we publish publicly available.

When an article is published we post the peer reviewers' comments and the authors' responses online. We also post the versions of the paper that were used during peer review. These are the versions that the peer review comments apply to.

The versions of the paper that follow are the versions that were submitted during the peer review process. They are not the versions of record or the final published versions. They should not be cited or distributed as the published version of this manuscript.

BMJ Open is an open access journal and the full, final, typeset and author-corrected version of record of the manuscript is available on our site with no access controls, subscription charges or pay-per-view fees (<http://bmjopen.bmj.com>).

If you have any questions on BMJ Open's open peer review process please email [info.bmjopen@bmj.com](mailto:info.bmjopen@bmj.com)

# BMJ Open

## Protocol for the ARCR\_Pred cohort-study: Swiss-wide multicenter evaluation and prediction of core outcomes in arthroscopic rotator cuff repair

|                               |                                                                                                                                                                                                                                                                                                                                                                                                                                                                                                                                                                                                                                                                                                                                                                                                                                                                                                                                                                                                                                                                                                                                                                                                                                                                                                                                                                                                                                                                                                                                                                                                                                                                                                                                                                                                                                                                                                                                                                                                                                                                                                                                                                                                                                                                                                                                                                  |
|-------------------------------|------------------------------------------------------------------------------------------------------------------------------------------------------------------------------------------------------------------------------------------------------------------------------------------------------------------------------------------------------------------------------------------------------------------------------------------------------------------------------------------------------------------------------------------------------------------------------------------------------------------------------------------------------------------------------------------------------------------------------------------------------------------------------------------------------------------------------------------------------------------------------------------------------------------------------------------------------------------------------------------------------------------------------------------------------------------------------------------------------------------------------------------------------------------------------------------------------------------------------------------------------------------------------------------------------------------------------------------------------------------------------------------------------------------------------------------------------------------------------------------------------------------------------------------------------------------------------------------------------------------------------------------------------------------------------------------------------------------------------------------------------------------------------------------------------------------------------------------------------------------------------------------------------------------------------------------------------------------------------------------------------------------------------------------------------------------------------------------------------------------------------------------------------------------------------------------------------------------------------------------------------------------------------------------------------------------------------------------------------------------|
| Journal:                      | <i>BMJ Open</i>                                                                                                                                                                                                                                                                                                                                                                                                                                                                                                                                                                                                                                                                                                                                                                                                                                                                                                                                                                                                                                                                                                                                                                                                                                                                                                                                                                                                                                                                                                                                                                                                                                                                                                                                                                                                                                                                                                                                                                                                                                                                                                                                                                                                                                                                                                                                                  |
| Manuscript ID                 | bmjopen-2020-045702                                                                                                                                                                                                                                                                                                                                                                                                                                                                                                                                                                                                                                                                                                                                                                                                                                                                                                                                                                                                                                                                                                                                                                                                                                                                                                                                                                                                                                                                                                                                                                                                                                                                                                                                                                                                                                                                                                                                                                                                                                                                                                                                                                                                                                                                                                                                              |
| Article Type:                 | Protocol                                                                                                                                                                                                                                                                                                                                                                                                                                                                                                                                                                                                                                                                                                                                                                                                                                                                                                                                                                                                                                                                                                                                                                                                                                                                                                                                                                                                                                                                                                                                                                                                                                                                                                                                                                                                                                                                                                                                                                                                                                                                                                                                                                                                                                                                                                                                                         |
| Date Submitted by the Author: | 12-Oct-2020                                                                                                                                                                                                                                                                                                                                                                                                                                                                                                                                                                                                                                                                                                                                                                                                                                                                                                                                                                                                                                                                                                                                                                                                                                                                                                                                                                                                                                                                                                                                                                                                                                                                                                                                                                                                                                                                                                                                                                                                                                                                                                                                                                                                                                                                                                                                                      |
| Complete List of Authors:     | <p>Audigé, Laurent ; Schulthess Klinik, Research and Development; University Hospital Basel, Orthopaedic Surgery and Traumatology</p> <p>Bucher, Heiner; University Hospital Basel, Basel Institute for Clinical Epidemiology and Biostatistics</p> <p>Aghlmandi, Soheila; University Hospital Basel, Basel Institute for Clinical Epidemiology and Biostatistics</p> <p>Stojanov, Thomas; University Hospital Basel, Orthopaedic Surgery and Traumatology; University Hospital Basel, Basel Institute for Clinical Epidemiology and Biostatistics</p> <p>Schwappach, David; Patient Safety Foundation; University of Bern, Institute of Social and Preventive Medicine</p> <p>Hunziker, Sabina; University Hospital Basel, Medical Communication / Psychosomatic Medicine</p> <p>Candrian, Christian; Ospedale Regionale di Lugano, Trauma and Ortho Unit</p> <p>Cunningham, Gregory; Hirslanden Clinique La Colline, Shoulder Center; Geneva University Hospitals, Division of Orthopaedics and Trauma Surgery, Department of Surgery</p> <p>Durchholz, Holger; Klinik Gut Sankt Moritz</p> <p>Eid, Karim; Baden Cantonal Hospital, Clinic for Orthopaedics and Traumatology</p> <p>Flury, Matthias; In-Motion, Center for Orthopaedics and Neurosurgery</p> <p>Jost, B; Cantonal Hospital of St.Gallen, Clinic for Orthopaedic Surgery and Traumatology of the Musculoskeletal system</p> <p>Ladermann, Alexandre; La Tour Hospital, Division of Orthopaedics and Trauma Surgery; Geneva University Hospitals, Division of Orthopaedics and Trauma Surgery, Department of Surgery</p> <p>Moor, Beat; Hôpital de Martigny Centre Hospitalier du Valais Romand, Service for Orthopaedics and Traumatology of the Musculoskeletal system</p> <p>Moroder, Philipp; Charite Universitätsmedizin Berlin, Department of Shoulder and Elbow Surgery, Center for Musculoskeletal Surgery,</p> <p>Rosso, Claudio; Arthro Medics, Shoulder and Elbow Center</p> <p>Schär, Michael; Inselspital Universitätsspital Bern, Department of Orthopaedic Surgery and Traumatology</p> <p>Scheibel, Markus; Schulthess Klinik, Shoulder and Elbow Surgery,; Charité Universitätsmedizin Berlin, Department for Shoulder and Elbow surgery - Center for Musculoskeletal Surgery- Campus Virchow</p> <p>Spormann, Christophe; Endoclinic, Center for Endoprosthetics and Joint</p> |

|           |                                                                                                                                                                                                                                                                                                                                                                                                                                    |
|-----------|------------------------------------------------------------------------------------------------------------------------------------------------------------------------------------------------------------------------------------------------------------------------------------------------------------------------------------------------------------------------------------------------------------------------------------|
|           | Surgery<br>Suter, Thomas; Canton Hospital Baselland, Orthopaedic Shoulder and Elbow<br>Wieser , Karl ; University of Zurich, Department of Orthopaedics, Balgrist University Hospital<br>Zumstein, Matthias; Orthopaedics Sonnenhof, Shoulder, Elbow and Orthopaedic Sports Medicine<br>ARCR_Pred Study Group, Name; University Hospital Basel<br>Müller, Andreas; University Hospital Basel, Orthopaedic Surgery and Traumatology |
| Keywords: | ORTHOPAEDIC & TRAUMA SURGERY, Musculoskeletal disorders <<br>ORTHOPAEDIC & TRAUMA SURGERY, Shoulder < ORTHOPAEDIC &<br>TRAUMA SURGERY                                                                                                                                                                                                                                                                                              |
|           |                                                                                                                                                                                                                                                                                                                                                                                                                                    |

SCHOLARONE™  
Manuscripts

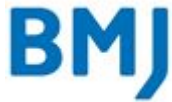

I, the Submitting Author has the right to grant and does grant on behalf of all authors of the Work (as defined in the below author licence), an exclusive licence and/or a non-exclusive licence for contributions from authors who are: i) UK Crown employees; ii) where BMJ has agreed a CC-BY licence shall apply, and/or iii) in accordance with the terms applicable for US Federal Government officers or employees acting as part of their official duties; on a worldwide, perpetual, irrevocable, royalty-free basis to BMJ Publishing Group Ltd ("BMJ") its licensees and where the relevant Journal is co-owned by BMJ to the co-owners of the Journal, to publish the Work in this journal and any other BMJ products and to exploit all rights, as set out in our [licence](#).

The Submitting Author accepts and understands that any supply made under these terms is made by BMJ to the Submitting Author unless you are acting as an employee on behalf of your employer or a postgraduate student of an affiliated institution which is paying any applicable article publishing charge ("APC") for Open Access articles. Where the Submitting Author wishes to make the Work available on an Open Access basis (and intends to pay the relevant APC), the terms of reuse of such Open Access shall be governed by a Creative Commons licence – details of these licences and which [Creative Commons](#) licence will apply to this Work are set out in our licence referred to above.

Other than as permitted in any relevant BMJ Author's Self Archiving Policies, I confirm this Work has not been accepted for publication elsewhere, is not being considered for publication elsewhere and does not duplicate material already published. I confirm all authors consent to publication of this Work and authorise the granting of this licence.

1  
2  
3 **1 Protocol for the ARCR\_Pred cohort-study: Swiss-wide multicenter evaluation and**  
4 **2 prediction of core outcomes in arthroscopic rotator cuff repair**  
5  
6  
7  
8

9 4 Laurent Audigé<sup>1,2,3†</sup>, Heiner C. Bucher<sup>3</sup>, Soheila Aghlmandi<sup>3</sup>, Thomas Stojanov<sup>1,2,3</sup>, David  
10 5 Schwappach<sup>4,5</sup>, Sabina Hunziker<sup>6</sup>, Christian Candrian<sup>7</sup>, Gregory Cunningham<sup>8,9</sup>, Holger  
11 6 Durchholz<sup>10</sup>, Karim Eid<sup>11</sup>, Matthias Flury<sup>12</sup>, Bernhard Jost<sup>13</sup>, Alexandre Lädermann<sup>9,14</sup>, Beat  
12 7 Moor<sup>15</sup>, Philipp Moroder<sup>16</sup>, Claudio Rosso<sup>17</sup>, Michael Schär<sup>18</sup>, Markus Scheibel<sup>16,19</sup>, Christoph  
13 8 Spormann<sup>20</sup>, Thomas Suter<sup>21</sup>, Karl Wieser<sup>22</sup>, Matthias A. Zumstein<sup>23,24</sup>, ARCR\_Pred Study  
14 9 Group\*, Andreas Müller<sup>1</sup>  
15  
16  
17  
18  
19  
20  
21  
22

23 **11 Author affiliations:**  
24

- 25 12 1. Orthopaedic Surgery and Traumatology, University Hospital of Basel, Basel, Switzerland  
26 13 2. Research and Development Department, Schulthess Klinik, Zurich, Switzerland  
27 14 3. Basel Institute for Clinical Epidemiology and Biostatistics, University Hospital of Basel, Basel,  
28 15 Switzerland  
29 16 4. Swiss Patient Safety Foundation, Zurich, Switzerland  
30 17 5. Institute of Social and Preventive Medicine (ISPM), University of Bern, Bern, Switzerland  
31 18 6. Medical Communication / Psychosomatic, University Hospital of Basel, Basel, Switzerland  
32 19 7. Trauma and Ortho Unit, Ospedale Regionale di Lugano, Lugano, Switzerland  
33 20 8. Shoulder Center, Hirslanden Clinique la Colline, Geneva, Switzerland  
34 21 9. Division of Orthopaedics and Trauma Surgery, Department of Surgery, Geneva University  
35 22 Hospitals, Geneva, Switzerland  
36 23 10. Klinik Gut, St Moritz, Switzerland  
37 24 11. Clinic for Orthopaedics and Traumatology, Cantonal Hospital of Baden, Baden, Switzerland  
38 25 12. Center for Orthopaedics and Neurosurgery, In-Motion, Wallisellen, Switzerland  
39 26 13. Clinic for Orthopaedic Surgery and Traumatology of the Musculoskeletal system , Cantonal  
40 27 Hospital of St.Gallen, St.Gallen, Switzerland  
41 28 14. Division of Orthopaedics and Trauma Surgery, La Tour Hospital, Meyrin, Switzerland  
42 29 15. Service for Orthopaedics and Traumatology of the Musculoskeletal system , Hôpital du Valais –  
43 30 Centre Hospitalier du Valais Romand, Martigny, Switzerland  
44  
45  
46  
47  
48  
49  
50  
51  
52  
53  
54  
55  
56  
57  
58  
59  
60

- 1  
2  
3 31 16. Department for Shoulder and Elbow surgery - Center for Musculoskeletal Surgery- Campus  
4 32 Virchow, Charité Medicine University, Berlin, DE  
5  
6 33 17. Shoulder and Elbow Center, ARTHRO Medics, Basel, Switzerland  
7  
8 34 18. Department of Orthopaedic Surgery and Traumatology, Inselspital, Bern University Hospital,  
9  
10 35 University of Bern, Switzerland  
11  
12 36 19. Shoulder and Elbow Surgery, Schulthess Klinik, Zurich, Switzerland  
13  
14 37 20. Center for Endoprosthetics and Joint Surgery, Endoclinic, Zürich, Switzerland  
15  
16 38 21. Orthopaedic Shoulder and Elbow, Canton Hospital Baselland, Bruderholz, Switzerland  
17  
18 39 22. Department of Orthopaedics, Balgrist University Hospital, University of Zurich, Switzerland  
19  
20 40 23. Shoulder, Elbow and Orthopaedic Sports Medicine, Orthopaedics Sonnenhof, Bern, Switzerland  
21  
22 41 24. Stiftung Lindenhof, Campus SLB, Swiss Institute for Translational and Entrepreneurial Medicine,  
23  
24 42 Bern, Switzerland  
25  
26 43

27 44 †Corresponding author:

28  
29 45 Laurent Audigé, DVM PhD

30  
31 46 Schulthess Klinik

32  
33 47 Research and Development - Shoulder and Elbow Surgery

34  
35 48 Lengghalde 2, CH-8008 Zurich, Switzerland

36  
37 49 Phone: +41 44 385 7580; Fax: +41 44 385 7590

38  
39 50 E-mail: [laurent.audige@kws.ch](mailto:laurent.audige@kws.ch)  
40  
41  
42  
43  
44  
45  
46  
47  
48  
49  
50  
51  
52  
53  
54  
55  
56  
57  
58  
59  
60

53 \* Other members of the ARCR\_Pred Study Group are listed below per site:

54 **ARTHRO Medics, Basel, Switzerland (ART):** Jannine Buchschacher, Lena Fankhauser,

55 Corinne Eicher, Gernot Willscheid; **Charité Medicine University, Berlin, Germany (BER):**

56 Doruk Akgün, Kathi Thiele, Marvin Minkus, Victor Danzinger, Katrin Karpinski; **Canton**

57 **Hospital Baselland, Bruderholz, Switzerland (BRU):** Sebastian Mueller, Claudia Haag-

58 Schumacher; **Centre Hospitalier du Valais Romand, Martigny, Switzerland (CHV):**

59 Viviane Steffen, Sarah Fournier, Deborah Marietan, Sebastien Pawlak; **Endoclinic, Zürich,**

1  
2  
3 60 **Switzerland (END):** Britta Hansen, Ferdinand Lovrek, Marco Zanetti, Nadja Mamisch; **Klinik**  
4  
5 61 **Gut, St Moritz, Switzerland (GUT):** Christian Steiner, Georg Ahlbäumer, Jakob Bräm, Jens  
6  
7 62 Fischer, Alexander Delvendahl; **Hirslanden Clinique la Colline, Geneva, Switzerland**  
8  
9 63 **(HIR):** Patricia Simao, Abed Khourani; **La Tour Hospital, Meyrin, Switzerland (HUG):**  
10  
11 64 Anne-Sophie Foucault, Frank Kolo; **Inselspital, Bern University Hospital, Bern,**  
12  
13 65 **Switzerland (INB):** Adrian Schenk, Johannes Weihs, Remy Flückiger, Philipp Scacchi, Paolo  
14  
15 66 Lombardo; **In-Motion, Wallisellen, Switzerland (INM):** Larissa Hübscher, Ralph Berther,  
16  
17 67 Christine Ehrmann; **Cantonal Hospital of Baden, Baden, Switzerland (KSB):** Raffaella  
18  
19 68 Nobs, Richard Niehaus, Nisha Grünberger, Philipp Kriechling, Susanne Bensler; **Schulthess**  
20  
21 69 **Klinik, Zurich, Switzerland (KWS):** Hans-Kaspar Schwyzer, Fabrizio Moro, Michael  
22  
23 70 Glanzmann, Barbara Wirth, Christian Jung, Florian Freislederer, Manuela Nötzli, Frederik  
24  
25 71 Bellmann, Franz Anne, Jörg Oswald, Alex Marzel, Cécile Grobet, Marije de Jong, Martina  
26  
27 72 Wehrli, Jan Schätz; **Ospedale Regionale di Lugano, Lugano, Switzerland (LUG):**  
28  
29 73 Francesco Marbach, Marco Delcogliano, Davide Previtali, Florian Schönweger, Elena Porro,  
30  
31 74 Gabriela Induni-Lang, Giuseppe Filardo, Filippo Del Grande, Pietro Feltri, Schiavon  
32  
33 75 Guglielmo; **Cantonal Hospital of St.Gallen, St.Gallen, Switzerland (SGA):** Christian  
34  
35 76 Spross, Martin Olach, Michael Badulescu, Vilijam Zdravkovic, Stephanie Lüscher, Jörg  
36  
37 77 Scheler, Lena Ohrström; **Orthopädie Sonnenhof, Berne, Switzerland (SON):** Annabel  
38  
39 78 Hayoz, Frederick Schuster, Julia Müller-Lebschi; **Balgrist University Hospital, Zurich,**  
40  
41 79 **Switzerland (UKB):** Christian Gerber, Samy Bouaicha, Paul Borbas, Anita Hasler, Florian  
42  
43 80 Grubhofer, Sabrina Catanzaro, Sabine Wyss, Reto Sutter; **University Hospital of Basel,**  
44  
45 81 **Basel, Switzerland (USB):** Mohy Taha, Cornelia Baum, Ilona Ahlborn, Simone Hatz, Giorgio  
46  
47 82 Tamborrini-Schütz; **University Library Basel, Basel, Switzerland:** Christian Appenzeller-  
48  
49 83 Herzog.  
50  
51  
52  
53 84  
54  
55  
56  
57  
58  
59  
60

1  
2  
3 85 **Administrative information**

4 86 **Title** Protocol for the ARCR\_Pred cohort-study: Swiss-wide multicenter evaluation and  
5  
6  
7 87 prediction of core outcomes in arthroscopic rotator cuff repair  
8

9 88

10  
11 89 **Trial registration** ClinicalTrial.gov registration number NCT04321005  
12

13 90

14  
15 91 **Protocol version** Version 2 (13.12.2019)  
16

17 92

18  
19 93 **Funding** This project is funded by the Swiss National Science Foundation (SNF Project ID  
20  
21 94 320030\_184959, <http://p3.snf.ch/project-184959>). A complementary grant was provided by  
22  
23 95 Swiss Orthopedics. The sites Charité Medicine University, Berlin, Germany (BER) and  
24  
25 96 University Clinic Balgrist, Zurich, Switzerland (UKB) are funding their own participation in the  
26  
27 97 project.  
28

29 98

30  
31  
32 99 **Roles and responsibilities**  
33

34 100 LA and AM are the initiators and project leaders. LA, AM, HB, SA, DS and SH were involved  
35  
36 101 in the study design, which was reviewed and commented by principal investigators CC, GC,  
37  
38 102 HD, KE, MF, BJ, AL, BM, PM, CR, MS, MS, CS, TS, KW and MZ.  
39

40 103 Preparation of the manuscript was done by LA, AM, SA and TS. HB, DS and SH edited and  
41  
42 104 critically revised the paper. All authors have read and approved the manuscript. LA is the  
43  
44 105 guarantor of the manuscript.  
45

46 106 This is an investigator initiated project at the University Hospital of Basel. The principal  
47  
48 107 investigator and project leader (AM) is the official sponsor representative for the project and  
49  
50 108 was involved in all phases of the project from its conception to the current implementation  
51  
52 109 steps. The project initiators and project leaders (LA and AM) have ultimate authority over any  
53  
54 110 of the project activities.  
55

56  
57 111 A project scientific board (PSB) comprises the project leaders (LA and AM), project  
58  
59 112 investigators at each site (CC, GC, HD, KE, MF, BJ, AL, BM, PM, CR, MS, MS, CS, TS, KW  
60



1  
2  
3 113 and MZ), and project partners (SA, HB, DS and SH). The PSB shall meet at specific time  
4  
5 114 points during the study: before the study start, after completion of recruitment and the 12-  
6  
7 115 month follow-up, and at the end of the study. The agenda of these meetings will focus on  
8  
9 116 (however is not limited to) patient enrollment and the completion of follow-up examinations  
10  
11 117 and questionnaires, the documentation process in REDCap, data quality issues  
12  
13 118 (completeness and consistency), monitoring activities, adverse event assessment and  
14  
15 119 management, baseline patient description, ranking of prognostic factors for prognostic  
16  
17 120 models, progress of data analysis, publication strategy and decisions regarding data sharing.  
18  
19 121 Between these meetings, communication will be maintained between the project coordinating  
20  
21 122 team and investigators via various channels including emails, quarterly newsletters, phone  
22  
23 123 calls and (video) conference calls as required.  
24  
25  
26 124  
27  
28 125  
29  
30  
31  
32  
33  
34  
35  
36  
37  
38  
39  
40  
41  
42  
43  
44  
45  
46  
47  
48  
49  
50  
51  
52  
53  
54  
55  
56  
57  
58  
59  
60

1  
2  
3 126 **Abstract**

4 127 **Introduction** In the field of arthroscopic rotator cuff repair (ARCR), reporting standards of  
5  
6 128 published studies differ dramatically, notably concerning adverse events (AEs). In addition,  
7  
8 129 prognostic studies are overall methodologically poor, based on small datasets, and explore  
9  
10 130 only limited numbers of influencing factors. We aim to develop prognostic models for  
11  
12 131 individual ARCR patients, primarily for the patient-reported assessment of shoulder function  
13  
14 132 (Oxford Shoulder Score [OSS]) and the occurrence of shoulder stiffness 6 months after  
15  
16 133 surgery. We also aim to evaluate the use of a consensus Core Event Set (CES) for AEs and  
17  
18 134 validate a severity classification for these events, considering the patient's perspective.  
19  
20  
21  
22

23 136 **Methods and analysis** A cohort of 970 primary ARCR patients will be prospectively  
24  
25 137 documented from several Swiss and German orthopedic clinics up to 24 months  
26  
27 138 postoperatively. Patient clinical examinations at 6 and 12 months will include shoulder range  
28  
29 139 of motion and strength (Constant Score). Tendon repair integrity status will be assessed by  
30  
31 140 ultrasound at 12 months. Patient-reported questionnaires at 6, 12 and 24 months will  
32  
33 141 determine functional scores (Subjective Shoulder Value, OSS), anxiety and depression  
34  
35 142 scores, working status, sports activities, quality of life (EuroQol EQ-5D-5L). AEs will be  
36  
37 143 documented according to a CES. Prognostic models will be developed using an  
38  
39 144 internationally supported regression methodology. Multiple prognostic factors, including  
40  
41 145 patient baseline demographics, psychological, socioeconomic and clinical factors, rotator cuff  
42  
43 146 integrity, concomitant local findings, and (post)operative management factors will be  
44  
45 147 investigated.  
46  
47  
48

49 148  
50  
51 149 **Ethics and dissemination** This project contributes to the development of personalized risk  
52  
53 150 predictions for supporting the surgical decision process in ARCR. The consensus CES may  
54  
55 151 become an international reference for the reporting of complications in clinical studies and  
56  
57 152 registries. Ethical approval was obtained on April 1<sup>st</sup>, 2020, from the lead ethics committee  
58  
59  
60

1  
2  
3 153 (EKNZ, Basel Switzerland; ID: 2019-02076). All participants will provide informed, written  
4  
5 154 consent before enrollment in the study.

6  
7 155

### 8 9 156 **Strengths and limitations of this study**

- 10  
11 157 • Large prospective multicenter observation of routine care
- 12  
13 158 • Assessment of patient-reported outcomes (PROMs)
- 14  
15 159 • Implementation of an international core outcome set of adverse events (CES)
- 16  
17 160 • Internationally supported methodology for prognostic model development
- 18  
19 161 • Potential limited response to patient questionnaires at 24 months
- 20  
21 162

22  
23 163

### 24 163 **Introduction**

25  
26 164 Rotator cuff tears are one of the most common injuries of the shoulder joint, which may  
27  
28 165 cause pain and disability associated with severe restrictions in daily activities. Surgical repair  
29  
30 166 is indicated when nonoperative treatment fails or follows extended traumatic tears, notably  
31  
32 167 inactive patients without signs of advanced tendon degeneration or muscle fat infiltration <sup>1</sup>.  
33  
34 168 Clinical studies have demonstrated clinically-relevant improvement in shoulder function and  
35  
36 169 quality of life after arthroscopic rotator cuff tear repair (ARCR) <sup>2-5</sup>. The number of ARCRs has  
37  
38 170 increased over the last two decades <sup>6 7 8 9</sup> due to several contributing factors such as an  
39  
40 171 aging yet active population, improvements in operative repair techniques, and more liberal  
41  
42 172 indications for ARCRs.

43  
44  
45 173

46  
47 174 Not all patients, however, benefit from ARCR <sup>10</sup>. Patients may be affected by complications  
48  
49 175 and/or adverse events (AEs) like persistent pain, shoulder stiffness, infection, neurological  
50  
51 176 problems, and repair failures <sup>11 12</sup>. About 20% of patients may show, typically between 6 and  
52  
53 177 12 months following ARCR, a persistent rotator cuff defect <sup>13</sup>. Patients with healed tendons  
54  
55 178 may show better functional outcome after repair <sup>2 14 15</sup>. Postoperative shoulder stiffness, a  
56  
57 179 major complication reported to occur in 1.5% to 11.1% of ARCRs <sup>11</sup>, leads to limitations in  
58  
59 180 everyday activities, prolonged rehabilitation, and, in severe cases, to reoperation (capsular

1  
2  
3 181 release) <sup>16-18</sup>. Nonetheless, incident data on outcome and AEs are impaired by the  
4  
5 182 heterogeneity in definition and reporting <sup>13 19</sup>.  
6  
7 183  
8  
9 184 Valid and representative data on the safety and effectiveness of ARCR are nonexistent at the  
10  
11 185 Swiss national level. However, such data is paramount for optimizing the indication and  
12  
13 186 outcome of ARCR, and for benchmarking orthopedic clinics. Reporting standards are a  
14  
15 187 prerequisite for outcome and safety data. Recently, a Core Outcome Set (COS) <sup>20</sup> was  
16  
17 188 defined for shoulder disorders, which includes inner core domains of pain, physical function  
18  
19 189 and activities, global perceived effect (a person's assessment of their recovery or degree of  
20  
21 190 improvement), and AEs <sup>21 22</sup>. A Core Event Set (CES) was developed by international  
22  
23 191 consensus in ARCR <sup>23 24</sup> and lay the ground for the current project.  
24  
25  
26 192  
27  
28 193 Appropriate indication of ARCR and judgment on risks for AEs or unsatisfactory patient  
29  
30 194 outcomes rely on validated clinical prediction tools <sup>25 26</sup>, which are still sparse in the field of  
31  
32 195 surgical repair of a rotator cuff tear. Currently existing models focus on early surgical repair  
33  
34 196 <sup>27</sup>, tendon healing <sup>28 29</sup> or shoulder functional outcomes <sup>30</sup>. A model for shoulder stiffness  
35  
36 197 included patients with various shoulder pathologies and surgeries <sup>31</sup>. Furthermore, individual  
37  
38 198 outcome predictions in ARCR require the identification of relevant patient and management  
39  
40 199 factors. Several systematic reviews have highlighted the general lack of qualitative studies  
41  
42 200 focused on prognostic factors for ARCR outcomes <sup>32-36</sup>. In addition, we have observed the  
43  
44 201 substantial heterogeneity in terms of applied methodology, core outcomes and studied  
45  
46 202 prognostic factors, where certain factors (e.g., age, tear size, muscle degeneration, smoking)  
47  
48 203 are given greater focus over others (e.g., sex, traumatic onset). The reviews highlight the  
49  
50 204 need for more robust prospective studies to include additional patient-reported outcomes in a  
51  
52 205 multivariable context.  
53  
54  
55 206  
56  
57  
58  
59  
60

## 207 **Objectives**

208 *The overall objective* is to establish a prospective cohort of patients undergoing ARCR with  
209 standardized data collection and follow-up for the evaluation and prediction of targeted core  
210 safety, and clinical and patient-reported outcome parameters that are to be routinely  
211 collected in standard clinical care.

213 *The primary objective* is to develop predictive models for two core outcome parameters: 1)  
214 the patient-reported Oxford Shoulder Score (OSS) functional outcome, and 2) the occurrence  
215 of shoulder stiffness (primary safety event) as reported by patients and clinicians.

217 *Secondary objectives* are 1) to evaluate the content and applicability of the defined  
218 consensus CES (i.e. ARCR CES 1.0)<sup>23</sup> in routine practice considering the patient's  
219 perspective, 2) to quantify the incidence of AE up to 24 months after surgery (e.g., persisting  
220 or worsening pain, recurrent rotator cuff (RC) defect), 3) to validate an adapted severity  
221 classification for postoperative local AEs<sup>12,37</sup>, and 4) to develop predictive models for other  
222 clinically-relevant outcome parameters including patient-reported outcomes (e.g., perception  
223 of improvement, return to work, return to sports, quality of life, satisfaction with surgery,  
224 acceptability of symptom state), clinical outcomes (e.g., shoulder strength and motion) and  
225 specific AEs (e.g. RC defect at 12 months).

## 227 **Methods and analysis**

### 228 *Study design and setting*

229 This is a prospective multicenter cohort study in patients undergoing ARCR with 17  
230 participating orthopedic centers in Switzerland and one German center.

232 Several sub-projects, associated with the main ARCR cohort study, are planned and include  
233 a systematic review of prognostic studies in ARCR, the application of the ARCR CES 1.0 for  
234 AE documentation, and the application and validation of an AE severity classification

1  
2  
3 2354 236 *Eligibility criteria*

5  
6 237 Adult patients diagnosed with a partial or full-thickness RC tear by magnetic resonance  
7  
8 238 imaging (MRI), planned for a primary arthroscopic surgical repair, and giving their informed  
9  
10 239 consent to participate in the cohort study will be included. Patients undergoing a specific  
11  
12 240 surgical procedure for irreparable tears (i.e. tendon transfer, subacromial spacer or superior  
13  
14 241 capsular reconstruction), revision operations, open or mini-open reconstructions will be  
15  
16 242 excluded. Patients unable to give written informed consent or attend clinics for follow-up  
17  
18 243 visits, not fluent in German, French, Italian, or English or pregnant females will be excluded.  
19  
20 244 Patients undergoing bilateral ARCR will only be included for their first intervention.  
21  
22

23  
24 24525 246 *Intervention*

26  
27 247 Shoulder arthroscopies will be performed according to standardized clinic-specific and  
28  
29 248 international guidelines<sup>38</sup> in the context of routine care with patients in a beach-chair or  
30  
31 249 lateral decubitus position under general or local anesthesia. The variability in the repair  
32  
33 250 techniques used between clinics and surgeons will be documented. Typically, after the  
34  
35 251 diagnostic arthroscopy to assess the type of RC tear (partial or full-thickness tear and  
36  
37 252 involved tendons, tendon tear delamination, sign of tendon degeneration) and concomitant  
38  
39 253 injuries or lesions, the ruptured tendons are mobilized until they can be repositioned on the  
40  
41 254 original footprint with as little tension as possible. Tendon fixation may be performed using  
42  
43 255 one of multiple anchor and suture configurations according to the surgeon's decision. An  
44  
45 256 intervention at the biceps tendon is performed if any tendinopathy, or lesions to the superior  
46  
47 257 labrum or biceps pulley system are observed. An anterolateral or lateral acromioplasty is  
48  
49 258 performed at the surgeon's discretion, generally in the presence of a hooked-shaped  
50  
51 259 acromion or a critical shoulder angle larger than 35°, respectively. Operative details,  
52  
53 260 including additional concomitant procedures (acromioplasty, acromioclavicular joint  
54  
55 261 resection, capsulotomy, and biceps tenotomy or tenodesis) and operation duration are  
56  
57 262 recorded immediately after surgery. A standard 3-phase postoperative rehabilitation scheme  
58  
59  
60

1  
2  
3 263 is usually prescribed and will be documented in detail, including immobilization and passive  
4  
5 264 mobilization in the first phase, active mobilization and coordination training in the second  
6  
7 265 phase, followed by the third phase of specific progressive resistance exercises.  
8

9 266

### 10 267 *Outcomes*

11  
12  
13 268 The *first primary outcome* is the patient-reported change in shoulder functional outcome  
14  
15 269 between baseline and 6 months postoperatively as measured with the Oxford Shoulder  
16  
17 270 Score (OSS).<sup>39</sup> The OSS is a condition-specific questionnaire developed for patients with a  
18  
19 271 degenerative or inflammatory state of the shoulder. It contains twelve items to be answered  
20  
21 272 by the patient independently, which deal with pain (degree, time point) and possible  
22  
23 273 handicaps in private and professional life. There are five categories of response for every  
24  
25 274 question, corresponding to a score ranging from 0 to 4. Scores are summed to give a single  
26  
27 275 score with a range from 0 (worst outcome) to 48 (best outcome). Transcultural validations of  
28  
29 276 this questionnaire for the German and Italian populations have been performed<sup>40 41</sup> and are  
30  
31 277 validated for patient-based outcomes after RC repair<sup>42-44</sup>. While functional outcome at the  
32  
33 278 last 24-month follow-up is clinically relevant, the early 6-month primary time point is chosen  
34  
35 279 because of the importance in early surgical recovery and rehabilitation, particularly when  
36  
37 280 considering the socioeconomic impact on professionally active patients<sup>4</sup>.  
38  
39

40 281

41  
42 282 The *second primary outcome* is the occurrence of shoulder stiffness within 6 months after  
43  
44 283 surgery: this event is poorly defined in the literature<sup>19</sup>. We formed a consensus definition of  
45  
46 284 shoulder stiffness among specialized shoulder surgeons in a Delphi survey, which describes  
47  
48 285 a postoperative restriction in passive shoulder motion diagnosed within 6 months after ARCR  
49  
50 286 in at least two of the motion planes of flexion, abduction and external rotation in 0° abduction.  
51  
52 287 Motion restriction is to be assessed separately for each plane according to specific threshold  
53  
54 288 criteria (flexion: total motion equal to or below 90° or glenohumeral motion equal to or below  
55  
56 289 80°; abduction: total motion equal to or below 80° or glenohumeral motion equal to or below  
57  
58 290 60°; external rotation in 0° abduction: glenohumeral motion equal to or below 20° or no more  
59  
60



1  
2  
3 291 than 50% of the contralateral side value). In this project, we will identify cases of shoulder  
4  
5 292 stiffness based on our consensus definition as well as clinical records and reports from  
6  
7 293 clinicians and their patients.  
8

9 294  
10  
11 295 Secondary outcomes will include: 1) local AEs according to the ARCR CES, in particular the  
12  
13 296 occurrence of recurrent defect of repaired tendon(s) at 12 months, when at least one  
14  
15 297 repaired tendon is diagnosed with a recurrent defect by ultrasound examination, persistent or  
16  
17 298 worsening pain, infection, any local event (composite outcome); 2) functional parameters of  
18  
19 299 the Constant score (CS)<sup>45</sup> at 6 and 12 months, shoulder strength (kg) in abduction at 6 and  
20  
21 300 12 months, patient-reported shoulder pain on the numeric rating scale (NRS) at 6, 12 and 24  
22  
23 301 months, patient-reported shoulder function: OSS at 6, 12 and 24 months, Subjective  
24  
25 302 Shoulder Value (SSV)<sup>46</sup> assessment at 6, 12 and 24 months; 3) general health and  
26  
27 303 socioeconomic parameters including patient-reported quality of sleep (NRS) at 6, 12 and 24  
28  
29 304 months<sup>47</sup>, return to work, change of working condition within 6, 12 and 24 months, level of  
30  
31 305 depression and anxiety at 6, 12 and 24 months based on Patient-Reported Outcomes  
32  
33 306 Measurement Information System (PROMIS) scores<sup>48 49</sup>, patient perceived shoulder  
34  
35 307 improvement, acceptability of own symptom state<sup>50</sup>, quality of life (utilities and general health)  
36  
37 308 at 6, 12 and 24 months using the European Quality of Life 5 Dimensions 5 Level  
38  
39 309 questionnaire (EQ-5D-5L), patient satisfaction with the surgical outcome at 12 and 24  
40  
41 310 months; 4) safety outcome assessment, occurrence of all AEs reported by clinicians and  
42  
43 311 patients (including non-local AEs within 6 months after surgery), final independent surgeon  
44  
45 312 and patient-rated assessment of AEs according to perceived severity (rating scale from 0 [no  
46  
47 313 complication] to 100 [death]<sup>51</sup>), comprehensive Complication Index<sup>51</sup> considering all AEs that  
48  
49 314 occurred within 6 months after surgery.  
50  
51  
52

53 315  
54  
55 316 Shoulder ultrasound examinations will be performed at 12 months by experienced clinicians  
56  
57 317 independent of the operating surgeons. The repair integrity will be graded according to the  
58  
59 318 Sugaya classification (where grade 4 or 5 defines the occurrence of a recurrent effect)<sup>52 53</sup>.  
60



1  
2  
3 319 Other ultrasound parameters include the location of the recurrent defect (at the footprint |  
4  
5 320 medial cuff failure), long biceps tendon status, signs of anchor displacement, and location  
6  
7 321 and signs of suture cut-through.  
8

9 322

10  
11 323 *Participant timeline*

12  
13 324 Local investigators will identify patients who meet the eligibility criteria. Patient enrollment  
14  
15 325 started on June 1<sup>st</sup>, 2020 and is planned for a maximum period of 12 months. Patients will  
16  
17 326 complete a preoperative evaluation no more than 2 months before surgery. Follow-up  
18  
19 327 assessments will be performed at 6 weeks (+/- 1 week), and 6 (+/- 1 month), 12 (+/- 1 month)  
20  
21 328 and 24 months (+/- 2 months) postoperatively. At the final 24-month time point, only patient  
22  
23 329 self-reporting assessments will be documented (Figure 1).  
24

25 330

26  
27 331 *Baseline prognostic factors*

28  
29 332 Various baseline parameters, operative details, and postoperative management variables are  
30  
31 333 known or suspected to influence ARCR outcomes<sup>32-36</sup>.  
32

33 334

34  
35  
36 335 The following patient-related factors will be recorded: patient demographics [year of birth for  
37  
38 336 age, sex], socioeconomic parameters [nationality, marital status, the highest level of  
39  
40 337 education, employment status, last occupational position, daily physical workload], dominant  
41  
42 338 side, smoking & drinking status, general physical and mental health [Body Mass Index (BMI)  
43  
44 339 and obesity, American Society of Anesthesiologists (ASA) classification, comorbidities (e.g.  
45  
46 340 diabetes), concomitant medication, level of depression and anxiety (PROMIS Depression  
47  
48 341 and Anxiety Short Form 4a)<sup>48 49</sup>, quality of life (EQ-5D-5L)<sup>54</sup>.  
49

50 342

51  
52  
53 343 Disease-related factors are shoulder clinical examinations [pain level on a numeric rating  
54  
55 344 scale (NRS), range of motion, muscle strength, Constant Score<sup>45</sup>], patient-reported shoulder  
56  
57 345 function (see outcome measures), radiograph parameters [Critical Shoulder Angle<sup>55</sup>,  
58  
59 346 acromiohumeral distance<sup>56</sup>], MRI or arthro-Computer Tomography (CT) parameters  
60

1  
2  
3 347 [supraspinatus muscle atrophy<sup>57</sup>, tangent sign<sup>58</sup>, grade of fatty infiltration<sup>59 60</sup>], medical  
4  
5 348 history [cause of injury (trauma event), symptom duration, previous interventions (operation  
6  
7 349 and timing of surgery), actual medication, and the extent of physical therapy].  
8

9 350  
10  
11 351 Rotator cuff integrity and concomitant local findings. The RC tear will be determined by MRI  
12  
13 352 (or arthro-CT) and confirmed intraoperatively: tear size: location (involved tendons) and  
14  
15 353 grading (partial / complete), tendon retraction grade<sup>61</sup> and tear sagittal size<sup>62</sup>, status of the  
16  
17 354 biceps tendon, additional intraoperative observation of concomitant local injuries [Superior  
18  
19 355 Labrum from Anterior to Posterior (SLAP) lesion, Humeral Avulsion Glenohumeral Ligament  
20  
21 356 (HAGL), Bankart lesion, humeral and glenoid-side chondral lesions].  
22

23 357  
24  
25 358 Operative details and postoperative management: type of ARCR procedure [use of anchors,  
26  
27 359 suture techniques], augmentation techniques [e.g. platelet concentrates, scaffolds, ...]<sup>63</sup>,  
28  
29 360 additional concomitant treatment [acromioplasty, acromioclavicular joint resection,  
30  
31 361 capsulotomy, biceps tenotomy or tenodesis, treatment of SLAP lesion], operation duration,  
32  
33 362 duration of hospital stay, postoperative management [immobilization position and duration,  
34  
35 363 pain medication [e.g. using non-steroidal anti-inflammatory drugs], timing of passive and  
36  
37 364 active shoulder motion, physiotherapy and muscle training].  
38  
39

40 365  
41  
42 366 *Adverse event documentation and assessment process*  
43  
44 367 Operating surgeons will report the occurrence of any intraoperative AE on the operation  
45  
46 368 form. The occurrence of postoperative local AEs within 24 months will be reported by  
47  
48 369 investigators at the clinical examination and by patients on the questionnaires. The  
49  
50 370 occurrence of postoperative non-local AEs that are unrelated to the operation will be  
51  
52 371 documented in a similar manner, however only within 6 months after surgery. An AE form  
53  
54 372 was developed according to the ARCR CES 1.0<sup>23</sup>. Each AE documentation will be structured  
55  
56 373 after Audigé et al.<sup>64</sup> and includes the date/period of occurrence [intra- / postoperative], the  
57  
58 374 affected body location [local at the operated shoulder / non-local], the event group and  
59  
60

1  
2  
3 375 specification, applied health-related intervention(s) [operative / nonoperative procedure(s)],  
4  
5 376 its outcome at the time of reporting (or end of the study), and the assessment of the event  
6  
7 377 [causal factor(s) / severity grade / seriousness]. Severity grading will be made according to  
8  
9 378 existing and adapted systems for intraoperative<sup>65 66</sup> and postoperative<sup>12 37</sup> complications.  
10  
11 379 The documentation of AEs will be checked for completeness and consistency remotely as  
12  
13 380 well as on-site by reviewing selected patient files as part of the monitoring plan. A review  
14  
15 381 committee (LA, AM, TS, HD and DS) will assess all events reported by surgeons and  
16  
17 382 patients, and generate queries to the respective sites as required.  
18

19 383  
20  
21 384 Fully documented local events, including their treatment, outcome and possible causative  
22  
23 385 factors, will be formulated in layman's terms and sent back to the affected patients, so that  
24  
25 386 they can confirm and validate collected AE data as well as assess their severity on a visual  
26  
27 387 analogue scale from 0 (not at all severe) to 100 (extremely severe). This subsequent rating  
28  
29 388 will also be performed by their treating surgeon and four other randomly-selected surgeons  
30  
31 389 involved in the project, blinded from the original severity grading.  
32  
33

34 390

#### 35 391 *Sample size determination*

36 392 For sample size calculation, we set up a simulation study and used multiple regression to  
37  
38 393 predict the change in OSS within 6 months for the most important prognostic factors. The  
39  
40 394 prognostic factors were derived from an existing ARCR local registry<sup>67</sup> and include age, sex,  
41  
42 395 body mass index/obesity status, tendon quality/degeneration, and RC severity<sup>32-36</sup>. We  
43  
44 396 accounted for the type I error at 5% for statistical significance and the type II error set at 20%  
45  
46 397 for 80% statistical power<sup>68</sup>. Two thousand replications were done, and the p-values were  
47  
48 398 recorded to calculate the mean significance for each of the prognostic factors to reach a  
49  
50 399 minimum of 80% statistical power. This approach led to a sample of 920 patients.  
51  
52

53 400

54  
55 401 For the second primary outcome of shoulder stiffness, we accounted for a minimum of ten  
56  
57 402 events per variable to allow for the inclusion of a maximum of ten predictors into the model<sup>69</sup>  
58  
59  
60

1  
2  
3 403 <sup>70</sup>. The estimated event rate for shoulder stiffness from our pilot data set was 8.3%, which,  
4  
5 404 according to our experience, might reflect an underestimation of the true rate <sup>17</sup>. Therefore, a  
6  
7 405 10% stiffness rate was assumed, which resulted in a sample size calculation of 900 patients.  
8  
9 406 The higher resulting number determines the final number of patients to be recruited.  
10  
11 407 Therefore, 920 patients will be included with an additional 50 patients (i.e. 970 patients) due  
12  
13 408 to the anticipated maximum dropout rate of 5% at 6 months (based on personal experience).  
14

15 409

#### 17 410 *Recruitment*

19 411 Study sites and local investigators were selected based on their expertise in ARCR with  
20  
21 412 support by the shoulder and elbow expert group of Swiss Orthopaedics. Each site was  
22  
23 413 visited by the project leaders to assess the adequacy of local clinical and research settings  
24  
25 414 for the project as well as to ensure prior interest and commitment. The number of included  
26  
27 415 sites was determined based on the reported estimate of the number of ARCR patients that  
28  
29 416 could be realistically enrolled within one year from each site, and included an allowance for  
30  
31 417 overestimation (i.e. all sites together estimated that they could recruit up to 40% more than  
32  
33 418 the expected 970 patients within one year).

36 419 Patients who are enrolled after signing an informed consent form are definitively recruited for  
37  
38 420 the project after documentation of baseline parameters (clinical examinations and patient  
39  
40 421 questionnaires) and confirmation of ARCR during surgery. A recruitment curve is prepared  
41  
42 422 every 2 weeks and sent to the project sites along with a recruitment table presenting the  
43  
44 423 performance of each site. Sites that are unable to recruit the expected number of patients  
45  
46 424 within the first 3 months will be considered for exclusion from the project and replaced by  
47  
48 425 additional sites if the estimated total duration of patient enrollment is delayed for more than 3  
49  
50 426 months.

52 427

#### 55 428 *Data collection methods*

57 429 Data are collected on electronic or paper-based case report forms or patient questionnaires.  
58  
59 430 Project parameters and used instruments are presented in previous sections of this protocol.  
60

1  
2  
3 431 A training video was prepared for the collection of CS data <sup>45</sup>. For the measurement of  
4  
5 432 shoulder muscle strength, several devices were permitted, i.e. IsoForceControl® (MDS  
6  
7 433 Medical Device Solution, Oberburg, Switzerland), Mark-10 Force Gauge (Mark-10  
8  
9 434 Corporation, Copiague, USA) as well as hand-held (Lafayette Instrument Co., Lafayette,  
10  
11 435 USA) or MicroFET 2 (Hoggan Scientific, Salt Lake City, USA) dynamometers; the use of a  
12  
13 436 spring balance was not allowed.

14  
15 437  
16  
17 438 Patient clinical examinations, including baseline imaging assessments, are performed at  
18  
19 439 each site by experienced clinicians (who may be assisted by locally-trained research staff)  
20  
21 440 and documented primarily on paper-based case report forms. Baseline MRI and radiographs  
22  
23 441 are coded and centralized at the University of Basel to ensure data quality control. Operative  
24  
25 442 data are collected electronically by the respective surgeons shortly after surgery. Patients  
26  
27 443 complete questionnaires in their preferred language, which is limited to German, French,  
28  
29 444 Italian or English, either electronically after invitation, by email or on a tablet computer at the  
30  
31 445 site, or otherwise on paper. AEs are documented electronically by the respective surgeons  
32  
33 446 with support from their research staff. Data collected on paper forms are entered  
34  
35 447 electronically at each site or at a central location at the University of Basel based on the  
36  
37 448 agreement made with each site.

38  
39  
40 449

#### 41 42 450 *Data monitoring*

43  
44 451 A central project data manager will perform data quality control on all collected data. A  
45  
46 452 flowchart will be created to describe the number of consecutively recruited patients who had  
47  
48 453 an RCR by arthroscopic procedure or had a conversion to an open procedure, and who  
49  
50 454 completed follow-up clinical and imaging examinations as well as self-reported outcome  
51  
52 455 questionnaires. The reasons for patient dropout and loss to follow-up status will be monitored  
53  
54 456 and described. All recorded study parameters will be described using standard descriptive  
55  
56 457 statistics; continuous variables will be presented as means with standard deviations and  
57  
58  
59  
60

1  
2  
3 458 categorical variables as counts with percentages. The variability of data between clinics will  
4  
5 459 be explored to support the identification of outlier data.

6  
7 460 Weekly site-specific reports, including the patient enrollment list, expected follow-up timing  
8  
9 461 and identification of missing, erroneous or inconsistent data, are sent to the respective local  
10  
11 462 project staff. Data-related queries will be resolved remotely or by on-site monitoring visits  
12  
13 463 before the final analyses are performed.

14  
15 464 There is no plan for auditing project conduct other than via reporting at the annual meetings  
16  
17 465 of the project scientific board.

18  
19 466

20  
21 467 *Data management*

22  
23 468 Study data will be stored using the REDCap web-based electronic data capture system<sup>71 72</sup>  
24  
25 469 on a server that is hosted at Schulthess Klinik. REDCap conforms with Good Clinical  
26  
27 470 Practice guidelines that provide required features for data protection and integrity, e.g.,  
28  
29 471 password-protected access and change tracking.

30  
31 472

32  
33  
34 473 Study data will be coded and exported from the REDCap system into Stata software  
35  
36 474 (StataCorp LP, College Station, USA) for statistical analyses. Data transformations and  
37  
38 475 analyses will be primarily implemented using Stata and fully documented within Stata  
39  
40 476 programming files. Data subsets will be prepared for analyses using alternative software  
41  
42 477 (e.g. R for prediction models) as appropriate.

43  
44 478

45  
46 479 All patients with an intraoperatively confirmed RC tear and operated by ARCR will be  
47  
48 480 included in the analyses. Existing missing data will be imputed if the number of missing data  
49  
50 481 is non-negligible or could potentially bias the results and conclusions.

51  
52 482

53  
54 483 *Systematic review of prognostic factors*

55  
56 484 A systematic review of prognostic factors for ARCR outcomes is implemented (PROSPERO  
57  
58 485 registration ID: CRD42020199257). Briefly, literature from 2014 to 2020 will be checked to

1  
2  
3 486 identify longitudinal studies including patients diagnosed with a RC tear. These studies  
4  
5 487 should report the effect of at least one factor on one of the following outcomes: shoulder  
6  
7 488 stiffness, RC tear repair integrity, and shoulder function. Data extraction will follow a pre-  
8  
9 489 defined template and the collected data will be stored within a separate database using  
10  
11 490 REDCap. Data from different studies will be described and may be synthesized depending  
12  
13 491 on the data type and heterogeneity. These data will be used to generate a list of factors most  
14  
15 492 likely to influence our project outcomes and therefore, should be considered for inclusion in  
16  
17 493 the predictive model development process.

18  
19 49420  
21 495 *Predictive model development*

22  
23 496 To develop the predictive model(s), the seven steps proposed by Steyerberg et al.<sup>73 74</sup> will be  
24  
25 497 used. The steps comprise: 1) consideration of the research question and initial data  
26  
27 498 inspection, 2) coding of the predictors, 3) model specification, 4) model estimation, 5)  
28  
29 499 evaluation of model performance, 6) internal validation, and 7) model presentation.  
30  
31 500 Depending on the type of outcome, different models will be fitted and evaluated, i.e. multiple  
32  
33 501 regression models for the change in OSS at 6 months and multivariable logistic regression  
34  
35 502 models for shoulder stiffness. Model diagnostics will be performed for all models to check the  
36  
37 503 underlying assumptions.

38  
39 504

40  
41 505 The prediction of the model(s) will be based on the baseline, operative, and postoperative  
42  
43 506 management variables. Firstly, a subset of the potential prognostic factors will be defined  
44  
45 507 based on whether it is thought to be most predictive. The subset will be selected separately  
46  
47 508 for each outcome by the Delphi method among the investigators, whereby the factors will be  
48  
49 509 noted for their known or potential prognostic value on a 5-point Likert scale from 1 (not  
50  
51 510 important) to 5 (extremely important). These factors, with the highest mean score among  
52  
53 511 investigators, will form the subset.

54  
55 512  
56  
57  
58  
59  
60



1  
2  
3 513 We will then use criterion-based procedures (e.g. Akaike Information Criterion [AIC] or  
4  
5 514 adjusted  $R^2$ ) to select the best set of predictors for the continuous outcome(s) and for the  
6  
7 515 binary outcome, we will use the area under receiving operating characteristics curve (AUC).  
8  
9 516 To assess the predictive performance of the final models as well as the updated version of  
10  
11 517 the prediction models, the calibration plot and discrimination measures will be used. Thereby,  
12  
13 518 apparent performance will be evaluated on the respective development data, and internal  
14  
15 519 validated performance will be determined by bootstrapping. Independent external validation  
16  
17 520 will be estimated by applying the resulting models from the development data set in the  
18  
19 521 respective validation data sets. The resulting models will be used to predict the change of  
20  
21 522 outcome value (i.e. OSS in 6 months) and assess whether a patient will experience the event  
22  
23 523 (i.e. shoulder stiffness).  
24

25  
26 524

27  
28 525 If we observe missing data, then missing data imputation will be performed using a method  
29  
30 526 that allows for uncertainty in the imputed values (e.g. multiple imputations using chained  
31  
32 527 equation <sup>75</sup>). We will account for the clustering of records within clinics as appropriate.  
33

34 528

### 35 36 529 *Adverse events*

37  
38 530 Occurring AEs other than those listed in the CES as well as events occurring outside the  
39  
40 531 periods defined by the core set will be analyzed separately for consideration of clinical  
41  
42 532 relevance. This analysis will be made by the review committee and project scientific board  
43  
44 533 (PSB) comprising all local project leaders (principal investigators). Recommendations for  
45  
46 534 change of the ARCR CES 1.0 by the PSB will be formulated.  
47

48  
49 535

50  
51 536 The incidence of AEs, specific individual events and groups of events defined within the  
52  
53 537 ARCR CES 1.0 up to 24 months postoperatively will be displayed as the frequency of  
54  
55 538 patients with an event relative to the number of patients observed, reported together with its  
56  
57 539 95% Wilson confidence interval. These results will be presented in a summary table together  
58  
59 540 with the absolute frequency. Further details on the period of occurrence will be given by



1  
2  
3 541 stratifying for the time point of event occurrence. We will also stratify AEs according to their  
4  
5 542 severity level and patient relevance. Validation of the postoperative local AE severity  
6  
7 543 classification system will be implemented using previously used methods <sup>76 77</sup>.

8  
9 544

#### 10 545 *Patient and public involvement*

11  
12  
13 546 No patient or member of the public was involved in the design of this cohort study protocol.  
14  
15 547 Enrolled patients will contribute to the evaluation and validation of documented AEs and their  
16  
17 548 severity grading, therefore to a potential revision of the ARCR CES. We are planning to  
18  
19 549 present initial results to patients and the public, and get feedback for further analyses and  
20  
21 550 future model development as well as documentation system in ARCR.

22  
23  
24 551

#### 25 552 **Ethics and dissemination**

##### 26 553 *Research ethics approval*

27  
28  
29  
30 554 Ethical approval was obtained on April 1<sup>st</sup> 2020 from the lead ethics committee (EKNZ, Basel  
31  
32 555 Switzerland; ID: 2019-02076).

33  
34 556

##### 35 557 *Protocol amendments*

36  
37  
38 558 Minor protocol amendments, e.g. database production changes to facilitate monitoring  
39  
40 559 processes or improve outcome assessment by questionnaire, are fully documented. Major  
41  
42 560 amendments, e.g. changes to the patient information sheet and consent form, change of a  
43  
44 561 local project leader or the inclusion of a new project site, will be submitted for approval by the  
45  
46 562 lead ethics committee as required.

47  
48  
49 563

##### 50 564 *Consent or assent*

51  
52  
53 565 All participants will provide informed written consent prior to being enrolled into the study.  
54  
55 566 The English version of the informed consent form used at the University Hospital of Basel is  
56  
57 567 available as Supplement file 1.

58  
59 568  
60

1  
2 569 *Confidentiality*  
3

4 570 Project data will be handled with utmost discretion and can only be accessed by authorized  
5  
6 571 personnel as outlined by a study delegation list created for each project site. Patient data will  
7  
8 572 be coded, i.e. identified by a unique participant number. A participant identification list will be  
9  
10 573 managed and kept in a place (an electronic folder or paper-based form) only accessible to  
11  
12 574 authorized staff at each site.

13  
14  
15 575 The project leader affirms and upholds the principle of each patient's right to privacy and that  
16  
17 576 they shall comply with applicable privacy laws. In particular, anonymity of all patients shall be  
18  
19 577 guaranteed when presenting the data at scientific meetings or publishing them in scientific  
20  
21 578 journals.

22  
23 579

24  
25 580 *Declaration of interests*  
26

27 581 None declared.  
28  
29

30 582

31  
32 583 *Access to data*  
33

34 584 Project data will be shared at the end of the analysis process by the PSB. The Department of  
35  
36 585 Clinical Research (German Departement Klinische Forschung, DKF) at the University  
37  
38 586 Hospital of Basel will act as an independent data access committee, and will store the data  
39  
40 587 at the time of publication on secure servers, maintained and backed-up by the Information  
41  
42 588 and Communication Technology department at the University Hospital of Basel. Researchers  
43  
44 589 who wish to reuse data will be able to submit a project synopsis to the DKF at  
45  
46 590 [dkf.unibas.ch/contact](https://dkf.unibas.ch/contact). A data-sharing statement referring researchers to the DKF for data  
47  
48 591 access will be disseminated in the publications. Metadata describing the type, size and  
49  
50 592 content of the data sets will be shared along with the study protocol on the Harvard  
51  
52 593 Dataverse repository available online (<https://dataverse.harvard.edu/>). Additionally, the case  
53  
54 594 report forms will be uploaded on a medical data models portal ([https://medical-data-](https://medical-data-models.org/)  
55  
56 595 [models.org/](https://medical-data-models.org/)) and all variables will be annotated by their Unified Medical Language System  
57  
58 596 Concept Unique Identifier to improve accessibility to other clinicians.  
59  
60

1  
2  
3 5974 598 *Dissemination policy*

599 This project will lead to multiple open-access, peer-reviewed scientific publications, which will  
600 be prepared according to international standards (e.g. the STROBE statement<sup>78</sup> for cohort  
601 studies; TRIPOD<sup>79</sup> statements for prognostic studies; PRISMA<sup>80</sup> statement for systematic  
602 reviews). Publication authorship will regulated according to the guidelines of the Swiss  
603 Academies of Arts and Sciences<sup>81</sup>. Results will be submitted for presentation at national and  
604 international conferences. In addition, lay summary results will be developed and made  
605 available for patients and the public.

606

607 *Scientific relevance and broader impact*

608 This project initiates the development of personalized risk predictions to support the surgical  
609 decision process in ARCR. The consensus CES may become an international reference for  
610 the reporting of complications in clinical studies and registries, and may therefore provide a  
611 solid metric for the documentation of surgical safety in ARCR. Methodological insight gained  
612 from this project will be easily transferable to similar initiatives and thus, may foster the  
613 realization of other cohorts on safety and effectiveness outcome in shoulder surgery (e.g.  
614 arthroplasty) and orthopedics in general.

615

616 For patients affected by RC tears and their surgeons, this study will be the first to provide  
617 solid data on the incidence of patient-validated AEs and other core outcomes up to two years  
618 after surgical repair based on international consensus COS and CES. This study will allow  
619 the investigation of a comprehensive list of potential prognostic factors to generate predictive  
620 models for these core outcomes and hence, offer personalized health information to support  
621 future patients and surgeons in the decision process for surgery. Outcome predictors and  
622 risk calculators are increasingly being developed in numerous medical fields including  
623 surgery and orthopedics, and they are in development in the field of ARCR.

624  
60

1  
2  
3 625 This study will assess the structure and content of the ARCR CES and consolidate its validity  
4  
5 626 in capturing unfavorable events of importance to both patients and surgeons; considering the  
6  
7 627 patient's perspective is an essential step in the development of a COS. Furthermore, the  
8  
9 628 validation of an adapted severity classification of AEs in this study will provide an essential  
10  
11 629 system for assessing surgical morbidity in orthopedics. We expect that the ARCR CES and  
12  
13 630 the event severity classification will become international standards for the reporting of  
14  
15 631 ARCR AEs in clinical studies and registries, and therefore provide a solid metric for the  
16  
17 632 documentation of surgical safety in ARCR.

18  
19 633  
20  
21 634 This study fosters the enterprise in developing a Swiss-wide registry of ARCR, which will  
22  
23 635 allow the ongoing evaluation and prediction of targeted core safety, clinical and patient-  
24  
25 636 reported outcomes. The identification of factors mostly associated with relevant outcomes  
26  
27 637 will facilitate a lean and straightforward documentation process for ARCR patients in  
28  
29 638 Switzerland and abroad.

30 639

### 31 32 640 **Acknowledgments**

33  
34  
35  
36 641 The authors acknowledge the support of Dr. Martina Gosteli, medical librarian at the  
37  
38 642 University of Zurich, for implementing the preliminary literature database search to support  
39  
40 643 this protocol development. The authors would also like to acknowledge the support of  
41  
42 644 Dr. Melissa Wilhelmi, medical writer at Schulthess Klinik, Zurich, Switzerland, for manuscript  
43  
44 645 proofreading.

45  
46 646  
47  
48  
49  
50  
51  
52  
53  
54  
55  
56  
57  
58  
59  
60

647 **References**

- 648 1. Schmidt CC, Morrey BF. Management of full-thickness rotator cuff tears: appropriate use  
649 criteria. *J Shoulder Elbow Surg* 2015;24(12):1860-7. doi: 10.1016/j.jse.2015.05.042
- 650 2. Carr AJ, Cooper CD, Campbell MK, et al. Clinical effectiveness and cost-effectiveness of  
651 open and arthroscopic rotator cuff repair [the UK Rotator Cuff Surgery (UKUFF)  
652 randomised trial]. *Health Technol Assess* 2015;19(80):1-218. doi: 10.3310/hta19800  
653 [published Online First: 2015/10/16]
- 654 3. Moosmayer S, Lund G, Seljom US, et al. At a 10-Year Follow-up, Tendon Repair Is  
655 Superior to Physiotherapy in the Treatment of Small and Medium-Sized Rotator Cuff  
656 Tears. *J Bone Joint Surg Am* 2019;101(12):1050-60. doi: 10.2106/JBJS.18.01373  
657 [published Online First: 2019/06/21]
- 658 4. Grobet C, Audige L, Eichler K, et al. Cost-Utility Analysis of Arthroscopic Rotator Cuff  
659 Repair: A Prospective Health Economic Study Using Real-World Data. *Arthrosc  
660 Sports Med Rehabil* 2020;2(3):e193-e205. doi: 10.1016/j.asmr.2020.02.001  
661 [published Online First: 2020/06/18]
- 662 5. Piper CC, Hughes AJ, Ma Y, et al. Operative versus nonoperative treatment for the  
663 management of full-thickness rotator cuff tears: a systematic review and meta-  
664 analysis. *J Shoulder Elbow Surg* 2018;27(3):572-76. doi: 10.1016/j.jse.2017.09.032  
665 [published Online First: 2017/11/25]
- 666 6. Ensor KL, Kwon YW, Dibeneditto MR, et al. The rising incidence of rotator cuff repairs. *J  
667 Shoulder Elbow Surg* 2013;22(12):1628-32. doi: 10.1016/j.jse.2013.01.006
- 668 7. Iyengar JJ, Samagh SP, Schairer W, et al. Current trends in rotator cuff repair: surgical  
669 technique, setting, and cost. *Arthroscopy* 2014;30(3):284-8. doi:  
670 10.1016/j.arthro.2013.11.018
- 671 8. Colvin AC, Egorova N, Harrison AK, et al. National trends in rotator cuff repair. *J Bone  
672 Joint Surg Am* 2012;94(3):227-33. doi: 10.2106/JBJS.J.00739
- 673 9. Jung C, Buchmann S, Flury M. Die arthroskopische Rotatorenmanschetten-  
674 Rekonstruktion - Von der Ausnahme zum Standard. *Swiss Journal of Medicine and  
675 Medical Technology (Swiss Med)*, 2012:35-39.
- 676 10. Keener JD, Patterson BM, Orvets N, et al. Degenerative Rotator Cuff Tears: Refining  
677 Surgical Indications Based on Natural History Data. *J Am Acad Orthop Surg*  
678 2019;27(5):156-65. doi: 10.5435/JAAOS-D-17-00480 [published Online First:  
679 2018/10/20]
- 680 11. Randelli P, Spennacchio P, Ragone V, et al. Complications associated with arthroscopic  
681 rotator cuff repair: a literature review. *Musculoskelet Surg* 2012;96(1):9-16. doi:  
682 10.1007/s12306-011-0175-y

- 1  
2  
3 683 12. Felsch Q, Mai V, Durchholz H, et al. Complications within 6 months after arthroscopic  
4 684 rotator cuff repair: registry-based evaluation according to a core event set and  
5 685 severity grading. *Arthroscopy* 2020;in Press. doi: 10.1016/j.arthro.2020.08.010  
6 686 [published Online First: 2020/08/25]  
7  
8 687 13. Muller AM, Flury M, Alsayed HN, et al. Influence of patient and diagnostic parameters on  
9 688 reported retear rates after arthroscopic rotator cuff repair. *Knee Surg Sports*  
10 689 *Traumatol Arthrosc* 2017 doi: 10.1007/s00167-017-4481-2  
11  
12 690 14. Yoo JH, Cho NS, Rhee YG. Effect of postoperative repair integrity on health-related  
13 691 quality of life after rotator cuff repair: healed versus retear group. *Am J Sports Med*  
14 692 2013;41(11):2637-44. doi: 10.1177/0363546513499152 [published Online First:  
15 693 2013/08/15]  
16  
17 694 15. Robinson HA, Lam PH, Walton JR, et al. The effect of rotator cuff repair on early  
18 695 overhead shoulder function: a study in 1600 consecutive rotator cuff repairs. *Journal*  
19 696 *of Shoulder & Elbow Surgery* 2017;26(1):20-29. doi:  
20 697 <https://dx.doi.org/10.1016/j.jse.2016.05.022>  
21  
22 698 16. Huberty DP, Schoolfield JD, Brady PC, et al. Incidence and treatment of postoperative  
23 699 stiffness following arthroscopic rotator cuff repair. *Arthroscopy : the journal of*  
24 700 *arthroscopic & related surgery : official publication of the Arthroscopy Association of*  
25 701 *North America and the International Arthroscopy Association* 2009;25(8):880-90. doi:  
26 702 10.1016/j.arthro.2009.01.018 [published Online First: 2009/08/12]  
27  
28 703 17. Denard PJ, Ladermann A, Burkhart SS. Prevention and management of stiffness after  
29 704 arthroscopic rotator cuff repair: systematic review and implications for rotator cuff  
30 705 healing. *Arthroscopy* 2011;27(6):842-8. doi: 10.1016/j.arthro.2011.01.013  
31  
32 706 18. Itoi E, Arce G, Bain GI, et al. Shoulder Stiffness: Current Concepts and Concerns.  
33 707 *Arthroscopy : the journal of arthroscopic & related surgery : official publication of the*  
34 708 *Arthroscopy Association of North America and the International Arthroscopy*  
35 709 *Association* 2016;32(7):1402-14. doi: 10.1016/j.arthro.2016.03.024 [published Online  
36 710 First: 2016/05/18]  
37  
38 711 19. Audige L, Blum R, Muller AM, et al. Complications Following Arthroscopic Rotator Cuff  
39 712 Tear Repair: A Systematic Review of Terms and Definitions With Focus on Shoulder  
40 713 Stiffness. *Orthopaedic Journal of Sports Medicine* 2015;3(6) doi:  
41 714 10.1177/2325967115587861  
42  
43 715 20. Gargon E, Gurung B, Medley N, et al. Choosing important health outcomes for  
44 716 comparative effectiveness research: a systematic review. *PLoS One*  
45 717 2014;9(6):e99111. doi: 10.1371/journal.pone.0099111  
46  
47 718 21. Buchbinder R, Page MJ, Huang H, et al. A Preliminary Core Domain Set for Clinical  
48 719 Trials of Shoulder Disorders: A Report from the OMERACT 2016 Shoulder Core  
49  
50  
51  
52  
53  
54  
55  
56  
57  
58  
59  
60



- 1  
2  
3 720 Outcome Set Special Interest Group. *J Rheumatol* 2017;44(12):1880-83. doi:  
4 721 10.3899/jrheum.161123 [published Online First: 2017/01/17]  
5  
6 722 22. Page MJ, Huang H, Verhagen AP, et al. Identifying a core set of outcome domains to  
7 723 measure in clinical trials for shoulder disorders: a modified Delphi study. *RMD Open*  
8 724 2016;2(2):e000380. doi: 10.1136/rmdopen-2016-000380 [published Online First:  
9 725 2017/01/27]  
10  
11  
12 726 23. Audige L, Flury M, Muller AM, et al. Complications associated with arthroscopic rotator  
13 727 cuff tear repair: definition of a core event set by Delphi consensus process. *J*  
14 728 *Shoulder Elbow Surg* 2016;25(12):1907-17. doi: 10.1016/j.jse.2016.04.036  
15  
16  
17 729 24. Felsch Q, Mai V, Durchholz H, et al. Complications within 6 months after arthroscopic  
18 730 rotator cuff repair: registry-based evaluation according to a core event set and  
19 731 severity grading. *Arthroscopy : the journal of arthroscopic & related surgery : official*  
20 732 *publication of the Arthroscopy Association of North America and the International*  
21 733 *Arthroscopy Association* 2020 doi: 10.1016/j.arthro.2020.08.010 [published Online  
22 734 First: 2020/08/25]  
23  
24  
25  
26 735 25. Steyerberg EW, Moons KG, van der Windt DA, et al. Prognosis Research Strategy  
27 736 (PROGRESS) 3: prognostic model research. *PLoS Med* 2013;10(2):e1001381. doi:  
28 737 10.1371/journal.pmed.1001381 [published Online First: 2013/02/09]  
29  
30  
31 738 26. Sepucha KR, Atlas SJ, Chang Y, et al. Informed, Patient-Centered Decisions Associated  
32 739 with Better Health Outcomes in Orthopedics: Prospective Cohort Study. *Med Decis*  
33 740 *Making* 2018;38(8):1018-26. doi: 10.1177/0272989X18801308 [published Online  
34 741 First: 2018/11/08]  
35  
36  
37 742 27. Guo W, Jin J, Paynabar K, et al. A decision support system on surgical treatments for  
38 743 rotator cuff tears. *IIE Transactions on Healthcare Systems Engineering*  
39 744 2015;5(3):197-210. doi: 10.1080/19488300.2015.1065935  
40  
41  
42 745 28. Kwon J, Kim SH, Lee YH, et al. The Rotator Cuff Healing Index: A New Scoring System  
43 746 to Predict Rotator Cuff Healing After Surgical Repair. *Am J Sports Med*  
44 747 2019;47(1):173-80. doi: 10.1177/0363546518810763 [published Online First:  
45 748 2018/11/30]  
46  
47  
48 749 29. Jeong HY, Kim HJ, Jeon YS, et al. Factors predictive of healing in large rotator cuff tears:  
49 750 Is it possible to predict retear preoperatively? *The American journal of sports*  
50 751 *medicine* 2018;46(7):1693-700.  
51  
52  
53 752 30. Frangiamore S, Dornan GJ, Horan MP, et al. Predictive Modeling to Determine  
54 753 Functional Outcomes After Arthroscopic Rotator Cuff Repair. *Am J Sports Med*  
55 754 2020;48(7):1559-67. doi: 10.1177/0363546520914632 [published Online First:  
56 755 2020/05/15]  
57  
58  
59  
60

- 1  
2  
3 756 31. Koorevaar RC, van't Riet E, Ipskamp M, et al. Incidence and prognostic factors for  
4 757 postoperative frozen shoulder after shoulder surgery: a prospective cohort study.  
5 758 *Archives of orthopaedic and trauma surgery* 2017;137(3):293-301.
- 7 759 32. Fermont AJ, Wolterbeek N, Wessel RN, et al. Prognostic factors for recovery after  
8  
9 760 arthroscopic rotator cuff repair: a prognostic study. *J Shoulder Elbow Surg*  
10 761 2015;24(8):1249-56. doi: 10.1016/j.jse.2015.04.013
- 12 762 33. Lambers Heerspink FO, Dorrestijn O, van Raay JJ, et al. Specific patient-related  
13 763 prognostic factors for rotator cuff repair: a systematic review. *J Shoulder Elbow Surg*  
14 764 2014;23(7):1073-80. doi: 10.1016/j.jse.2014.01.001
- 16 765 34. McElvany MD, McGoldrick E, Gee AO, et al. Rotator cuff repair: published evidence on  
17 766 factors associated with repair integrity and clinical outcome. *American Journal of*  
18 767 *Sports Medicine* 2015;43(2):491-500. doi:  
19 768 <http://dx.doi.org/10.1177/0363546514529644>
- 23 769 35. Saccomanno MF, Sircana G, Cazzato G, et al. Prognostic factors influencing the  
24 770 outcome of rotator cuff repair: a systematic review. *Knee Surg Sports Traumatol*  
25 771 *Arthrosc* 2016;24(12):3809-19.
- 27 772 36. Raman J, Walton D, MacDermid JC, et al. Predictors of outcomes after rotator cuff  
28 773 repair-A meta-analysis. *J Hand Ther* 2017;30(3):276-92. doi:  
29 774 <https://dx.doi.org/10.1016/j.jht.2016.11.002>
- 31 775 37. Dindo D, Demartines N, Clavien PA. Classification of surgical complications: a new  
32 776 proposal with evaluation in a cohort of 6336 patients and results of a survey. *Ann*  
33 777 *Surg* 2004;240(2):205-13. [published Online First: 2004/07/27]
- 35 778 38. Lafosse L, Jost B, Reiland Y, et al. Structural integrity and clinical outcomes after  
36 779 arthroscopic repair of isolated subscapularis tears. *J Bone Joint Surg Am*  
37 780 2007;89(6):1184-93. doi: 10.2106/JBJS.F.00007
- 39 781 39. Dawson J, Rogers K, Fitzpatrick R, et al. The Oxford shoulder score revisited. *Arch*  
40 782 *Orthop Trauma Surg* 2009;129(1):119-23. doi: 10.1007/s00402-007-0549-7  
41 783 [published Online First: 2008/01/10]
- 43 784 40. Huber W, Hofstaetter JG, Hanslik-Schnabel B, et al. The German version of the Oxford  
44 785 Shoulder Score--cross-cultural adaptation and validation. *Arch Orthop Trauma Surg*  
45 786 2004;124(8):531-6.
- 47 787 41. Murena L, Vulcano E, D'Angelo F, et al. Italian cross-cultural adaptation and validation of  
48 788 the Oxford Shoulder Score. *J Shoulder Elbow Surg* 2010;19(3):335-41. doi: S1058-  
49 789 2746(09)00376-0 [pii]  
50 10.1016/j.jse.2009.07.068 [published Online First: 2009/11/10]



- 1  
2  
3 791 42. Olley LM, Carr AJ. The use of a patient-based questionnaire (the Oxford Shoulder Score)  
4 792 to assess outcome after rotator cuff repair. *Ann R Coll Surg Engl* 2008;90(4):326-31.  
5 793 doi: 10.1308/003588408X285964 [published Online First: 2008/05/22]  
6  
7 794 43. Xu S, Chen JY, Lie HME, et al. Minimal Clinically Important Difference of Oxford,  
8 795 Constant, and UCLA shoulder score for arthroscopic rotator cuff repair. *J* 2020;19:21-  
9 796 27. doi: 10.1016/j.jor.2019.11.037 [published Online First: 2020/02/06]  
10  
11 797 44. Allom R, Colegate-Stone T, Gee M, et al. Outcome analysis of surgery for disorders of  
12 798 the rotator cuff: a comparison of subjective and objective scoring tools. *J Bone Joint*  
13 799 *Surg Br* 2009;91(3):367-73. doi: 10.1302/0301-620X.91B3.20714 [published Online  
14 800 First: 2009/03/05]  
15  
16 801 45. Constant CR, Gerber C, Emery RJ, et al. A review of the Constant score: modifications  
17 802 and guidelines for its use. *J Shoulder Elbow Surg* 2008;17(2):355-61. doi:  
18 803 10.1016/j.jse.2007.06.022 [published Online First: 2008/01/26]  
19  
20 804 46. Gilbert MK, Gerber C. Comparison of the subjective shoulder value and the Constant  
21 805 score. *J Shoulder Elbow Surg* 2007;16(6):717-21. doi: 10.1016/j.jse.2007.02.123  
22 806 [published Online First: 2007/12/07]  
23  
24 807 47. Cappelleri JC, Bushmakin AG, McDermott AM, et al. Psychometric properties of a single-  
25 808 item scale to assess sleep quality among individuals with fibromyalgia. *Health and*  
26 809 *quality of life outcomes* 2009;7(1):54.  
27  
28 810 48. Potter MQ, Wylie JD, Greis PE, et al. Psychological distress negatively affects self-  
29 811 assessment of shoulder function in patients with rotator cuff tears. *Clin Orthop Relat*  
30 812 *Res* 2014;472(12):3926-32. doi: 10.1007/s11999-014-3833-1  
31  
32 813 49. Makhni EC, Meadows M, Hamamoto JT, et al. Patient Reported Outcomes Measurement  
33 814 Information System (PROMIS) in the upper extremity: the future of outcomes  
34 815 reporting? *Journal of Shoulder and Elbow Surgery* 2017;26(2):352-57. doi:  
35 816 10.1016/j.jse.2016.09.054  
36  
37 817 50. Tubach F, Wells GA, Ravaud P, et al. Minimal clinically important difference, low disease  
38 818 activity state, and patient acceptable symptom state: methodological issues. *J*  
39 819 *Rheumatol* 2005;32(10):2025-9. [published Online First: 2005/10/06]  
40  
41 820 51. Slankamenac K, Graf R, Barkun J, et al. The comprehensive complication index: a novel  
42 821 continuous scale to measure surgical morbidity. *Ann Surg* 2013;258(1):1-7. doi:  
43 822 10.1097/SLA.0b013e318296c732  
44  
45 823 52. Sugaya H, Maeda K, Matsuki K, et al. Functional and structural outcome after  
46 824 arthroscopic full-thickness rotator cuff repair: single-row versus dual-row fixation.  
47 825 *Arthroscopy : the journal of arthroscopic & related surgery : official publication of the*  
48 826 *Arthroscopy Association of North America and the International Arthroscopy*  
49 827 *Association* 2005;21(11):1307-16. doi: 10.1016/j.arthro.2005.08.011 [published  
50 828 Online First: 2005/12/06]

- 1  
2  
3 829 53. Collin P, Yoshida M, Delarue A, et al. Evaluating postoperative rotator cuff healing:  
4 830 Prospective comparison of MRI and ultrasound. *Orthop Traumatol Surg Res*  
5 831 2015;101(6 Suppl):S265-8. doi: 10.1016/j.otsr.2015.06.006 [published Online First:  
6 832 2015/08/19]
- 7  
8  
9 833 54. Herdman M, Gudex C, Lloyd A, et al. Development and preliminary testing of the new  
10 834 five-level version of EQ-5D (EQ-5D-5L). *Qual Life Res* 2011;20(10):1727-36. doi:  
11 835 10.1007/s11136-011-9903-x [published Online First: 2011/04/12]
- 12  
13 836 55. Moor BK, Wieser K, Slankamenac K, et al. Relationship of individual scapular anatomy  
14 837 and degenerative rotator cuff tears. *J Shoulder Elbow Surg* 2014;23(4):536-41. doi:  
15 838 10.1016/j.jse.2013.11.008
- 16  
17  
18 839 56. Werner CM, Conrad SJ, Meyer DC, et al. Intermethod agreement and interobserver  
19 840 correlation of radiologic acromiohumeral distance measurements. *J Shoulder Elbow*  
20 841 *Surg* 2008;17(2):237-40. doi: 10.1016/j.jse.2007.06.002
- 21  
22  
23 842 57. Thomazeau H, Rolland Y, Lucas C, et al. Atrophy of the supraspinatus belly assessment  
24 843 by MRI in 55 patients with rotator cuff pathology. *Acta orthopaedica Scandinavica*  
25 844 1996;67(3):264-68.
- 26  
27  
28 845 58. Zanetti M, Gerber C, Hodler J. Quantitative assessment of the muscles of the rotator cuff  
29 846 with magnetic resonance imaging. *Investigative radiology* 1998;33(3):163-70.
- 30  
31 847 59. Schiefer M, Mendonca R, Magnanini MM, et al. Intraobserver and interobserver  
32 848 agreement of Goutallier classification applied to magnetic resonance images. *J*  
33 849 *Shoulder Elbow Surg* 2015;24(8):1314-21. doi: 10.1016/j.jse.2015.02.011
- 34  
35  
36 850 60. Goutallier D, Postel JM, Bernageau J, et al. Fatty muscle degeneration in cuff ruptures.  
37 851 Pre- and postoperative evaluation by CT scan. *Clin Orthop Relat Res* 1994(304):78-  
38 852 83. [published Online First: 1994/07/01]
- 39  
40  
41 853 61. Patte D. Classification of rotator cuff lesions. *Clin Orthop Relat Res* 1990(254):81-6.  
42 854 [published Online First: 1990/05/01]
- 43  
44 855 62. Okoroha KR, Mehran N, Duncan J, et al. Characterization of Rotator Cuff Tears:  
45 856 Ultrasound Versus Magnetic Resonance Imaging. *Orthopedics* 2016:1-7. doi:  
46 857 10.3928/01477447-20161013-04
- 47  
48  
49 858 63. Zumstein MA, Ladermann A, Raniga S, et al. The biology of rotator cuff healing.  
50 859 *Orthopaedics & traumatology, surgery & research : OTSR* 2016 doi:  
51 860 10.1016/j.otsr.2016.11.003 [published Online First: 2017/01/04]
- 52  
53 861 64. Audige L, Goldhahn S, Daigl M, et al. How to document and report orthopedic  
54 862 complications in clinical studies? A proposal for standardization. *Arch Orthop Trauma*  
55 863 *Surg* 2014;134(2):269-75. doi: 10.1007/s00402-011-1384-4
- 56  
57  
58 864 65. Rosenthal R, Hoffmann H, Clavien PA, et al. Definition and Classification of  
59 865 Intraoperative Complications (CLASSIC): Delphi Study and Pilot Evaluation. *World J*  
60 866 *Surg* 2015;39(7):1663-71. doi: 10.1007/s00268-015-3003-y

- 1  
2  
3 867 66. Dell-Kuster S, Gomes NV, Gawria L, et al. Prospective validation of classification of  
4 868 intraoperative adverse events (ClassIntra): international, multicentre cohort study.  
5 869 *BMJ* 2020;370:m2917. doi: 10.1136/bmj.m2917 [published Online First: 2020/08/28]  
6  
7 870 67. Flury M, Kolling C, Grobet C, et al. Implementation of a local outcome register for  
8 871 arthroscopic rotator cuff tear repair. *Obere Extremität* 2014;10(1):33-40. doi:  
9 872 10.1007/s11678-014-0299-4  
10  
11 873 68. Vach W. Regression models as a tool in medical research. Boca Raton, FL: CRC Press,  
12 874 Taylor & Francis Group 2013.  
13  
14 875 69. Peduzzi P, Concato J, Kemper E, et al. A simulation study of the number of events per  
15 876 variable in logistic regression analysis. *J Clin Epidemiol* 1996;49(12):1373-9.  
16 877 [published Online First: 1996/12/01]  
17  
18 878 70. Hemingway H, Croft P, Perel P, et al. Prognosis research strategy (PROGRESS) 1: a  
19 879 framework for researching clinical outcomes. *BMJ* 2013;346:e5595. doi:  
20 880 10.1136/bmj.e5595 [published Online First: 2013/02/07]  
21  
22 881 71. Harris PA, Taylor R, Thielke R, et al. Research electronic data capture (REDCap)--a  
23 882 metadata-driven methodology and workflow process for providing translational  
24 883 research informatics support. *Journal of biomedical informatics* 2009;42(2):377-81.  
25 884 doi: 10.1016/j.jbi.2008.08.010 [published Online First: 2008/10/22]  
26  
27 885 72. REDCap web-based Electronic Data Capture system 2017 [Available from: [www.project-](http://www.project-redcap.org)  
28 886 [redcap.org](http://www.project-redcap.org) accessed 15.03.2017 2017].  
29  
30 887 73. Steyerberg EW, Vergouwe Y. Towards better clinical prediction models: seven steps for  
31 888 development and an ABCD for validation. *European Heart Journal* 2014;35(29):1925-  
32 889 31. doi: 10.1093/eurheartj/ehu207  
33  
34 890 74. Steyerberg EW. Clinical prediction models, 2009.  
35  
36 891 75. Team RC. R: A language and environment for statistical computing. : R Foundation for  
37 892 Statistical Computing, Vienna, Austria; 2016 [Available from: [www.R-project.org](http://www.R-project.org).  
38 893  
39 894 76. Porembka MR, Hall BL, Hirbe M, et al. Quantitative weighting of postoperative  
40 895 complications based on the accordion severity grading system: demonstration of  
41 896 potential impact using the american college of surgeons national surgical quality  
42 897 improvement program. *Journal of the American College of Surgeons*  
43 898 2010;210(3):286-98. doi: 10.1016/j.jamcollsurg.2009.12.004  
44 899  
45 900 77. de la Rosette JJ, Opondo D, Daels FP, et al. Categorisation of complications and  
46 901 validation of the Clavien score for percutaneous nephrolithotomy. *European urology*  
47 902 2012;62(2):246-55.  
48 903  
49 904 78. Vandembroucke JP, Von Elm E, Altman DG, et al. Strengthening the Reporting of  
50 905 Observational Studies in Epidemiology (STROBE): explanation and elaboration.  
51 906 *PLoS Med* 2007;4(10):e297.  
52  
53  
54  
55  
56  
57  
58  
59  
60

- 1  
2  
3 904 79. Collins GS, Reitsma JB, Altman DG, et al. Transparent Reporting of a multivariable  
4 905 prediction model for Individual Prognosis or Diagnosis (TRIPOD): the TRIPOD  
5 906 statement. *Ann Intern Med* 2015;162(1):55-63. doi: 10.7326/M14-0697 [published  
6 907 Online First: 2015/01/07]  
7  
8 908 80. Moher D, Liberati A, Tetzlaff J, et al. Preferred reporting items for systematic reviews and  
9 909 meta-analyses: the PRISMA statement. *PLoS Med* 2009;6(7):e1000097. doi:  
10 910 10.1371/journal.pmed.1000097 [published Online First: 2009/07/22]  
11  
12 911 81. Swiss Academies of Arts and Sciences. Authorship in scientific publications – Analysis  
13 912 and recommendations [Available from: [http://www.swiss-](http://www.swiss-academies.ch/en/index/Publikationen/Archiv/Richtlinien-Empfehlungen.html)  
14 913 [academies.ch/en/index/Publikationen/Archiv/Richtlinien-Empfehlungen.html](http://www.swiss-academies.ch/en/index/Publikationen/Archiv/Richtlinien-Empfehlungen.html) accessed  
15 914 06.10.2020.

19  
20  
21 915  
22  
23  
24  
25  
26  
27  
28  
29  
30  
31  
32  
33  
34  
35  
36  
37  
38  
39  
40  
41  
42  
43  
44  
45  
46  
47  
48  
49  
50  
51  
52  
53  
54  
55  
56  
57  
58  
59  
60

1  
2  
3 916 **Figure legend**

4  
5 917

6  
7 918 **Figure 1:** Flowchart of study procedures

8  
9 919 w = week; mo = month; FU = follow-up; MRI = Magnetic Resonance Imaging; CT = Arthro-  
10  
11 920 Computer Tomography (\*if MRI not possible); Motion = Shoulder range of motion; CS =  
12  
13 921 Constant Score; RC = Rotator Cuff; AE = Adverse Event; Rehab. = recall on postoperative  
14  
15 922 rehabilitation; DE = German; FR = French; IT = Italian; EN = English; NRS = Numeric Rating  
16  
17 923 Scale; OSS = Oxford Shoulder Score; SSV = Subjective Shoulder Value; EQ-5D-5L =  
18  
19 924 European Quality of Life 5 Dimensions 5 Level questionnaire; CES = Core Event Set; AE  
20  
21 925 survey = surgeons and patients survey regarding AE severity (sev)

22  
23  
24 926  
25  
26  
27  
28  
29  
30  
31  
32  
33  
34  
35  
36  
37  
38  
39  
40  
41  
42  
43  
44  
45  
46  
47  
48  
49  
50  
51  
52  
53  
54  
55  
56  
57  
58  
59  
60

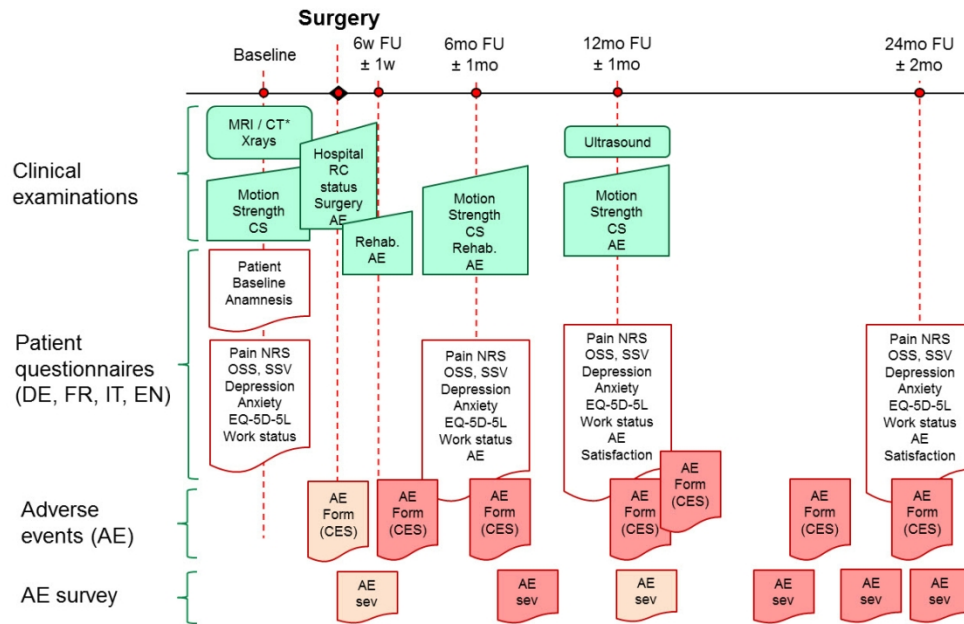

Figure 1: Flowchart of study procedures

w = week; mo = month; FU = follow-up; MRI = Magnetic Resonance Imaging; CT = Arthro-Computer Tomography (\*if MRI not possible); Motion = Shoulder range of motion; CS = Constant Score; RC = Rotator Cuff; AE = Adverse Event; Rehab. = recall on postoperative rehabilitation; DE = German; FR = French; IT = Italian; EN = English; NRS = Numeric Rating Scale; OSS = Oxford Shoulder Score; SSV = Subjective Shoulder Value; EQ-5D-5L = European Quality of Life 5 Dimensions 5 Level questionnaire; CES = Core Event Set; AE survey = surgeons and patients survey regarding AE severity (sev)

342x220mm (96 x 96 DPI)

**Supplement file 1**

**Article title** Protocol for the ARCR\_Pred cohort-study: Swiss-wide multicenter evaluation and prediction of core outcomes in arthroscopic rotator cuff repair

**Journal name** BMJ Open Access

**Author names** Laurent Audigé, Heiner C. Bucher, Soheila Aghlmandi, Thomas Stojanov, David Schwappach, Sabina Hunziker, Christian Candrian, Gregory Cunningham, Holger Durchholz, Karim Eid, Matthias Flury, Bernhard Jost, Alexandre Lädermann, Beat Moor, Philipp Moroder, Claudio Rosso, Michael Schär, Markus Scheibel, Christoph Spormann, Thomas Suter, Karl Wieser, Matthias A. Zumstein, ARCR\_Pred Study Group\*, Andreas Müller

**Corresponding author** Laurent Audigé, Schulthess Klinik, CH-8008 Zurich, Switzerland

**e-mail address** laurent.audige@kws.ch

\* Members of the ARCR\_Pred study group are listed in the main publication of this project protocol.

**Patient information sheet and informed consent form (English version) for the project site “University Hospital of Basel” (USB)**



## Engl. Surgical safety and effectiveness in orthopaedics: evaluation of an international consensus core set of adverse events in arthroscopic rotator cuff repair

This project has been organised by: PD Dr. Andreas Müller (project leader; Deputy Consultant of Orthopaedics, Shoulder/Elbow team leader, Orthopaedic and Traumatology Department, University Hospital of Basel) and Prof. Dr. Laurent Audigé (project manager; Research Associate, Orthopaedic and Traumatology Department, University Hospital of Basel and Head of Research Group Upper Extremities, Department of Research and Development, Schulthess Clinic, Zurich)

Sponsor: University Hospital of Basel, PD Dr. Andreas Müller, Deputy Consultant of Orthopaedics and Traumatology

Dear Sir / Madam,

We would like to ask you if you are interested in participating in a research project. The planned project is first presented as a short summary in the table provided below followed by a more detailed description.

### Summary of the project

|   |                                                                                                                                                                                                                                                                                                                                                                                                                                                                                                                                                                                                                                                                                                                                                                                               |
|---|-----------------------------------------------------------------------------------------------------------------------------------------------------------------------------------------------------------------------------------------------------------------------------------------------------------------------------------------------------------------------------------------------------------------------------------------------------------------------------------------------------------------------------------------------------------------------------------------------------------------------------------------------------------------------------------------------------------------------------------------------------------------------------------------------|
| 1 | <p><b>Aim of the project</b><br/>The research project will investigate how easily the most important results are predicted following surgical interventions to treat tendinosis (= rotator cuff tears) of the shoulder muscles. In order to do this, we will use and assess a predefined set of adverse events (such as frozen shoulder or persistent pain) in practice.</p>                                                                                                                                                                                                                                                                                                                                                                                                                  |
| 2 | <p><b>Choice</b><br/>You are an adult suffering from tendinosis of the shoulder muscles, which can be treated with an initial, minimally invasive (i.e. arthroscopic) surgical intervention. That is why we are sending you this information leaflet.</p>                                                                                                                                                                                                                                                                                                                                                                                                                                                                                                                                     |
| 3 | <p><b>General information about the project</b><br/>The collection of clinical data following surgical interventions is very important, and helps to support an established decision-making process within the orthopaedic field. We are carrying out this project so that we can better evaluate and predict the results following the repair of shoulder tendinosis. This evaluation is being carried out on a representative number of male and female patients in Switzerland.<br/>Patient safety is essential here. A list of possible adverse events following the arthroscopic intervention was recently defined by a group of more than 80 experts in the field. We would now like to better understand the development of these adverse events from the patient's point of view.</p> |
| 4 | <p><b>Procedure</b><br/>This project will last four years. In total, 970 patients from various clinics in Switzerland and one in Germany will be included in the study within the first year. Various examinations (e.g. measurements of range of motion and strength) will be carried out in the clinic before the operation (= preoperative) and then at the 6- and 12-month postoperative time points. At these times and at 2 years post-surgery, you will receive a questionnaire to complete. We will use ultrasound to check how the tendon is healing twelve months after the operation. Any adverse events will be evaluated independently by the doctor and the patient in question.</p>                                                                                            |



|    |                                                                                                                                                                                                                                                                                                                                                                                        |
|----|----------------------------------------------------------------------------------------------------------------------------------------------------------------------------------------------------------------------------------------------------------------------------------------------------------------------------------------------------------------------------------------|
| 5  | <p><b>Usefulness</b><br/>You will gain no personal benefit from participating in the project. However, the results could be important to others who have the same condition.</p>                                                                                                                                                                                                       |
| 6  | <p><b>Rights</b><br/>You decide voluntarily whether you want to participate in this project or not. Your decision does not affect your medical treatment/care and you do not have to justify it.</p>                                                                                                                                                                                   |
| 7  | <p><b>Duties</b><br/>If you participate, we ask you to adhere to certain requirements (e.g. attending visits and completing the questionnaires).</p>                                                                                                                                                                                                                                   |
| 8  | <p><b>Risks</b><br/>You are not exposed to any additional risk by participating in the project.</p>                                                                                                                                                                                                                                                                                    |
| 9  | <p><b>Outcomes</b><br/>You will be informed of new results during the project. We will promptly inform you of any additional findings (known as incidental findings) that are detected during the regular study examinations, which may affect your health directly. Any further course of action will then be discussed in detail with you.</p>                                       |
| 10 | <p><b>Confidentiality of data and samples</b><br/>We collect your personal and medical data from you. The Swiss National Science Foundation supports the exchange and reuse of research data. The data will be used for other projects if you give your separate consent. We comply with all legal data protection regulations. All parties involved are bound by confidentiality.</p> |
| 11 | <p><b>Withdrawal</b><br/>You can withdraw from the project at any time and no longer participate. The data collected so far are still being evaluated.</p>                                                                                                                                                                                                                             |
| 12 | <p><b>Indemnity</b><br/>You will not receive any compensation for participating in the study. Neither your health insurance provider nor you will incur any additional costs from your participation in the study.</p>                                                                                                                                                                 |
| 13 | <p><b>Liability</b><br/>The liability insurance of the project management is liable for any damages within the scope of the project.</p>                                                                                                                                                                                                                                               |
| 14 | <p><b>Funding</b><br/>The project is paid for by the Swiss National Science Foundation.</p>                                                                                                                                                                                                                                                                                            |
| 15 | <p><b>Contact person:</b><br/>You can receive information on all your questions at any time:</p> <p>PD Dr. Andreas Müller, Senior Consultant, Head Shoulder and Elbow,<br/>University Hospital of Basel, Spitalstrasse 21, CH-403 Basel<br/>Tel 061 315 25 17 , Email A.Mueller@usb.ch</p>                                                                                             |

## More detailed information

### 1. Aim of the project

The aim of this project is to investigate how the most important results (for example, the occurrence of adverse events or shoulder function) are easily predicted following a surgical intervention to treat tendinosis of the shoulder muscles. Furthermore, we want to investigate how well a predefined set of adverse events, which could occur as part of such a surgical intervention, corresponds to what actually occurs in practice.

### 2. Choice

Participation is open to anyone with a torn tendon in the shoulder muscles, which can be repaired with minimally invasive (i.e. arthroscopic) surgery.

**Important:** This must be the first intervention on the shoulder in question.

Participation is not open to anyone for whom a detailed medical examination would not be possible or who cannot be called back for check-ups within the follow-up period (e.g. if they live outside Switzerland). Underage persons should also not participate.

### 3. General information about the project

This project will be carried out in accordance with the laws of Switzerland. The responsible ethics committee has reviewed and approved this project

The collection of clinical data following surgical interventions is very important. You will help:

- to assess the effectiveness and safety of the intervention,
- to make comparisons with other methods,
- to support an established decision-making process within the orthopaedic field.

The study intends to document the most important events following arthroscopic interventions, especially in terms of:

- safety (occurrence of adverse events),
- healing of the tendon repair,
- shoulder pain and function,
- the general state of health and quality of life as well as
- patient satisfaction.

Patients' socio-demographic characteristics, examination parameters and treatment parameters will be investigated to enable a prediction of these events to be made.

In most areas of orthopaedics, there is currently no international standard for the description of adverse events (often known as complications) resulting from surgical interventions. In shoulder orthopaedics, such a list of events does not exist for arthroscopic interventions used in the treatment of rotator cuff tears (shoulder tendinosis). For this reason, the Shoulder and Elbow Surgery research group at the Schulthess Clinic, Zurich, working together with the Orthopaedic and Traumatology Department of the University Hospital of Basel and over 80 experts working in the field of arthroscopy for rotator cuff tears, have defined a list of possible adverse events.

The aim is to apply and evaluate this predefined list of events. Each event will be evaluated independently by the doctor and the patient in question.

This project is supported by the Swiss National Science Foundation and will last four years. In total, 970 patients will be included in the study within the first year. These patients will be recruited from various clinics in Switzerland and one clinic in Germany. At the University Hospital of Basel about 60 patients are recruited.

#### 4. Procedure

The following diagram shows the course of study events from the time of diagnosis to the follow-up appointment at two years post-surgery.

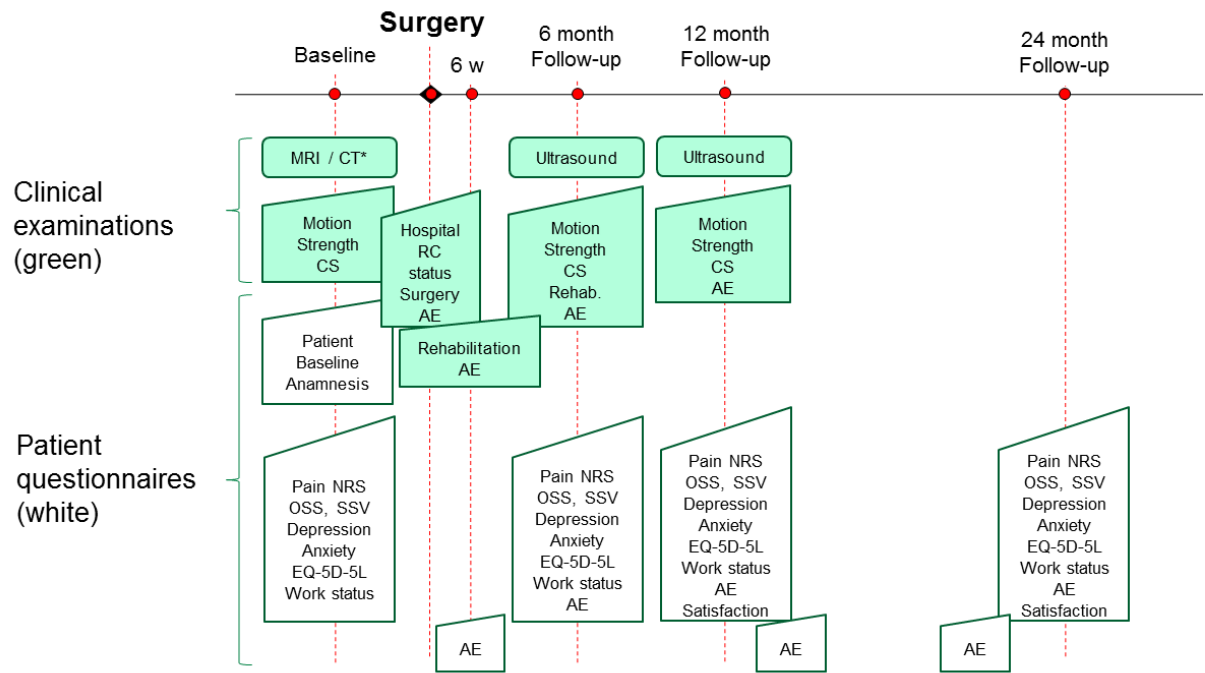

6 W = 6-week follow-up; AE = adverse events

*Figure 1: Schematic representation of the study's progress*

For your diagnosis, you will be examined by the doctor using various methods (e.g. functional testing, radiological and magnetic resonance imaging (= MRI)) during the first consultation. If you agree to participate in the project, you will receive a questionnaire, which will ask you to provide your personal details and estimate your current level of functional ability in everyday life. Shortly before the operation, your surgeon will record detailed information about your shoulder injury and the surgical intervention. Six weeks after the operation, your surgeon will ask you about your pain levels, rehabilitation programme and the occurrence of any adverse events.

During further follow-up appointments (at 6 and 12 months post-surgery), various examinations (e.g. measurements of range of motion and strength, see figure 1) are routinely performed in the clinic. An independent examiner will carry out an ultrasound routinely 12 months after the operation to document how the tendon is healing. You will also receive a questionnaire to complete. If you wish, you can complete this questionnaire at home - either on paper or electronically by following an invitation link that will be emailed to you. At the end of this document, you will be asked to provide your email address, if you do prefer to receive the electronic version of the questionnaire. Various questionnaires are already routinely recorded at the University Hospital of Basel.

Two years after the operation, you will be sent the questionnaire again by post or email (no further check-ups will take place at the clinic). This takes place within the framework of the project. If you have experienced one or more adverse events, the questionnaire will ask you to rate each event by severity and by its relationship to your treatment. The study doctors will evaluate all reported events by severity without knowing the patient, to whom these relate or the clinic in which the events occurred.

Each visit to the clinic ( before surgery and 6- and 12-months post-surgery) will last 40 to 60 minutes including all the examinations. Completing the patient questionnaire will take an additional 20 to 30 minutes. An adverse event tends to be evaluated in only a few minutes.

We may have to exclude you from this project prematurely. This can occur if no tear of the rotator cuff can be confirmed intraoperatively (i.e. during the operation) (this occurs very rarely) or if a tendon repair is not possible without additional interventions on the shoulder (a so-called irreparable tear). The study doctor will inform you of any such exclusion from the project.

## 5. Usefulness

You will not personally benefit from participating in the project. The results can be important for others who have the same condition. As described above, the study aims to enable better evaluation and prediction of the risk of adverse events and the effectiveness of a surgical intervention. We want to support the decision-making processes of future interventions of this kind.

## 6. Rights

You're volunteering. If you do not want to participate or later withdraw your participation, you do not have to justify this. Your medical treatment/care is guaranteed regardless of your decision. You may ask questions about participation and the project at any time. Please contact the person named at the end of this information.

## 7. Duties

As a participant, it is necessary that you

- adhere to the necessary specifications and requirements of the project management.
- inform your investigator/project management about the course of the disease and report new symptoms, new complaints and changes in well-being.
- inform your investigator/project management about the simultaneous treatment and therapy with another doctor and about taking medication.

## 8. Risks

You are not exposed to any additional risk by participating in the project.

## 9. Outcomes

The investigator/project manager will inform you during the project about any new findings that may affect the benefit or your safety and thus your consent to participate. You will be informed of random findings which may contribute to the prevention, detection or treatment of existing or future diseases.

## 10. Confidentiality of data and samples

Your personal and medical data will be collected for this project. Very few professionals will see your unencrypted data, and only to perform tasks within the scope of the project. Data collection for study purposes is encrypted. Encryption means that all reference data that could identify you (name, date of birth) are deleted and replaced by a key. The key list always remains in the institution/hospital. Those who do not know the key cannot therefore draw any conclusions about you. In the

1  
2  
3 case of a publication, the summarised data cannot therefore be traced back to you as  
4 an individual. Your name will never appear on the Internet or in any publication.  
5 Sometimes there is a requirement in a journal for publication that individual data (so-  
6 called raw data) must be transmitted. If individual data must be transmitted, then the  
7 data is always encrypted and cannot be traced back to you as a person. All persons  
8 who have access to your data within the scope of the project are subject to  
9 confidentiality. The requirements of data protection are adhered to and you as a  
10 participating person have the right to inspect your data at any time.

11  
12 If data are stored on site, it is a database for research purposes.

13  
14 Each centre will encode and save the data centrally in the project database (server  
15 location: Schulthess Clinic, Zurich). The data will be deleted 10 years after the end of  
16 the project.

17  
18 It is possible that your data may be used for other investigations (projects) at a later  
19 date or that they may be sent to another databank in Switzerland for investigations  
20 (further use) not yet defined in more detail. This other database must meet the same  
21 standards as the database for this project. For this further use we ask you to sign a  
22 further declaration of consent at the very end of this document.

23  
24 This project may be reviewed by the relevant ethics committee or by the institution that  
25 initiated the project. The project manager may need to disclose your personal and  
26 medical information for such checks. All persons must maintain absolute confidentiality.  
27 We comply with all data protection regulations and will not make your name public  
28 either in a publication or on the Internet.

29  
30 It is possible that your aftercare physician will be contacted to provide information  
31 about your medical condition.

### 32 33 **11. Withdrawal**

34 You can stop at any time and withdraw from the project if you wish. The data collected  
35 so far are still evaluated in encrypted form, otherwise the entire project loses its value.  
36 It is not possible to anonymize your data in case of withdrawal, i.e. the data remain  
37 encrypted. Please check whether you agree with this before you participate in the  
38 project.

### 39 40 **12. Indemnity**

41 If you participate in this project, you will not receive any compensation. You or your  
42 health insurance company will not incur any costs for participation.

### 43 44 **13. Liability**

45 The prerequisites and procedure relating to liability and safeguarding in the event of a  
46 claim are legally regulated. If you suffer a health impairment as a result of the study,  
47 please contact the study doctor. The institution that is responsible for carrying out the  
48 study is liable for the claim, if you can prove that the injury is due to the project-specific  
49 examinations. Liability will not be accepted if the project manager can prove that the  
50 injury is only minor and temporary, and does not extend beyond the degree expected by  
51 current scientific knowledge.

### 52 53 **14. Funding**

54 The project is being funded by the Swiss National Science Foundation (SNSF).

### 55 56 **15. Contact person(s)**

57 If you have any questions, concerns, or emergencies that arise during or after the  
58 project, you can always contact one of these contacts.

1  
2  
3  
4 Head at the study location:

5 PD Dr. Andreas Müller, Senior Consultant, Head Shoulder and Elbow

6 University Hospital of Basel, Spitalstrasse 21, CH-403 Basel

7 Tel 061 315 25 17 , Email [A.Mueller@usb.ch](mailto:A.Mueller@usb.ch)

8  
9 24-hour emergency number: +41 61 265 25 25

10  
11 Local project coordination:

12  
13 PD Dr. Andreas Müller, Senior Consultant, Head Shoulder and Elbow

14 University Hospital of Basel, Spitalstrasse 21, CH-403 Basel

15 Tel 061 315 25 17 , Email [A.Mueller@usb.ch](mailto:A.Mueller@usb.ch)



## Declaration of consent

### Written declaration of consent for participation in a study project

Please read this form carefully. Please ask if you do not understand or want to know something

**BASEC number (after submission):**

**Title of the project  
(scientific and lay):**

Surgical safety and effectiveness in orthopaedics:  
Swiss-wide multicenter evaluation and prediction of  
core outcomes in arthroscopic rotator cuff  
reconstruction

Surgical safeguarding and effectiveness in  
orthopaedics: Swiss-wide multicentre evaluation and  
prediction of the most important effects following  
arthroscopic repair of shoulder tendons (rotator cuff  
reconstruction)

**Responsible institution  
(Project management with address):**

University Hospital of Basel  
PD Dr. Andreas Müller  
Orthopaedics and Traumatology  
Spitalstrasse 21, CH-4031 Basel

**Place of implementation:**

Universitätsspital Basel

**Head of the project at the place of  
study:**

PD Dr. Andreas Müller

**Participant:**

Name, first name: \_\_\_\_\_

Date of Birth: \_\_\_\_\_

Female  Male

The undersigned investigator informed me verbally and in writing about the purpose, the course of the project, about possible advantages and disadvantages as well as about possible risks.

- I voluntarily participate in this project and accept the content of the written information provided on the above mentioned project. I've had plenty of time to make my decision.
- My questions concerning the participation in this project have been answered. I keep the written information and receive a copy of my written consent.
- I agree that the responsible experts of the project management/client of the project and the ethics committee responsible for this project may inspect my unencrypted data for verification and control purposes, but in strict compliance with confidentiality.
- I will be informed of study results or random findings that directly affect my health. If I don't want that, I'll inform my investigator.
- I know that my health-related and personal data can only be passed on in encrypted form for research purposes **for this project**.



- In the event of further treatment outside the test centre, I authorise my after-treating doctor(s) to forward my after-treatment data relevant to the project to the investigator/project management.
- I can withdraw from participation at any time and without giving reasons, without having any disadvantages in further medical treatment/care. The data collected so far will still be used for the evaluation of the project.
- The liability insurance of the hospital/institution covers any damages.
- I am aware that the obligations stated in the participant information must be complied with.
- If you agree that your email address can be used solely for receiving questionnaires and project-related communications, please enter it here:

\_\_\_\_\_@\_\_\_\_\_

|             |                          |
|-------------|--------------------------|
| Place, Date | Signature of participant |
|             |                          |

**Confirmation from the investigator:** I hereby confirm that I have explained the nature, significance and scope of the project to this participant. I assure you that I will fulfil all obligations in connection with this project in accordance with applicable law. If, at any time during the implementation of the project, I become aware of any aspects that might affect the participant's willingness to participate in the project, I will inform the participant immediately.

|             |                                                                     |
|-------------|---------------------------------------------------------------------|
| Place, Date | Name and first name of the informing investigator in block capitals |
|             | Signature of the investigating physician                            |

**Declaration of consent for the further use of data in encrypted form.  
(for further use of data of THIS project)**

**Participant:**

Name, first name: \_\_\_\_\_

Date of birth: \_\_\_\_\_

Female

Male

I allow my data from this project to be used in encrypted form for medical research. This means that the data may be stored in a databank and used for future, not yet defined research projects for an indefinite period of time. This consent is unlimited.

I decide voluntarily and can revoke this decision at any time. When I step back, my data is anonymized. I simply inform my investigator/project manager and do not have to justify this decision.

I understand that the data are encrypted and the code is kept safe. The data can be sent to other databanks in Switzerland and abroad for analysis if they comply with the same standards as in Switzerland. All legal requirements regarding data protection are complied with.

Normally, all data are evaluated in their entirety and the results published in summary form. Should a result be relevant for me, it is possible that I will be contacted via my investigator. If I do not wish this, I will inform my investigator/project manager.

If results from the data are handled for commercial purposes, I hereby make no claims on any part of this commercial use.

|             |                          |
|-------------|--------------------------|
| Place, Date | Signature of participant |
|-------------|--------------------------|

**Confirmation from the investigator:** I hereby confirm that I have explained to this participant the nature, significance and implications of the further use of data.

|             |                                                                     |
|-------------|---------------------------------------------------------------------|
| Place, Date | Name and first name of the informing investigator in block capitals |
|             | Signature of the investigating physician                            |

# Reporting checklist for protocol of a clinical trial.

Based on the SPIRIT guidelines.

## Instructions to authors

Complete this checklist by entering the page numbers from your manuscript where readers will find each of the items listed below.

Your article may not currently address all the items on the checklist. Please modify your text to include the missing information. If you are certain that an item does not apply, please write "n/a" and provide a short explanation.

Upload your completed checklist as an extra file when you submit to a journal.

In your methods section, say that you used the SPIRIT reporting guidelines, and cite them as:

Chan A-W, Tetzlaff JM, Gøtzsche PC, Altman DG, Mann H, Berlin J, Dickersin K, Hróbjartsson A, Schulz KF, Parulekar WR, Krleža-Jerić K, Laupacis A, Moher D. SPIRIT 2013 Explanation and Elaboration: Guidance for protocols of clinical trials. *BMJ*. 2013;346:e7586

|                                             | Reporting Item                                                                                                                  | Page Number |
|---------------------------------------------|---------------------------------------------------------------------------------------------------------------------------------|-------------|
| <b>Administrative information</b>           |                                                                                                                                 |             |
| Title                                       | <a href="#">#1</a> Descriptive title identifying the study design, population, interventions, and, if applicable, trial acronym | 1           |
| Trial registration                          | <a href="#">#2a</a> Trial identifier and registry name. If not yet registered, name of intended registry                        | 4           |
| Trial registration: data set                | <a href="#">#2b</a> All items from the World Health Organization Trial Registration Data Set                                    | n.a.        |
| Protocol version                            | <a href="#">#3</a> Date and version identifier                                                                                  | 4           |
| Funding                                     | <a href="#">#4</a> Sources and types of financial, material, and other support                                                  | 4           |
| Roles and responsibilities: contributorship | <a href="#">#5a</a> Names, affiliations, and roles of protocol contributors                                                     | 4           |

|    |                           |                     |                                                          |      |
|----|---------------------------|---------------------|----------------------------------------------------------|------|
| 1  | Roles and                 | <a href="#">#5b</a> | Name and contact information for the trial sponsor       | 4    |
| 2  | responsibilities:         |                     |                                                          |      |
| 3  | sponsor contact           |                     |                                                          |      |
| 4  | information               |                     |                                                          |      |
| 5  |                           |                     |                                                          |      |
| 6  |                           |                     |                                                          |      |
| 7  | Roles and                 | <a href="#">#5c</a> | Role of study sponsor and funders, if any, in study      | 4    |
| 8  | responsibilities:         |                     | design; collection, management, analysis, and            |      |
| 9  | sponsor and funder        |                     | interpretation of data; writing of the report; and the   |      |
| 10 |                           |                     | decision to submit the report for publication,           |      |
| 11 |                           |                     | including whether they will have ultimate authority      |      |
| 12 |                           |                     | over any of these activities                             |      |
| 13 |                           |                     |                                                          |      |
| 14 |                           |                     |                                                          |      |
| 15 |                           |                     |                                                          |      |
| 16 |                           |                     |                                                          |      |
| 17 | Roles and                 | <a href="#">#5d</a> | Composition, roles, and responsibilities of the          | 4    |
| 18 | responsibilities:         |                     | coordinating centre, steering committee, endpoint        |      |
| 19 | committees                |                     | adjudication committee, data management team,            |      |
| 20 |                           |                     | and other individuals or groups overseeing the trial,    |      |
| 21 |                           |                     | if applicable (see Item 21a for data monitoring          |      |
| 22 |                           |                     | committee)                                               |      |
| 23 |                           |                     |                                                          |      |
| 24 |                           |                     |                                                          |      |
| 25 |                           |                     |                                                          |      |
| 26 |                           |                     |                                                          |      |
| 27 | <b>Introduction</b>       |                     |                                                          |      |
| 28 |                           |                     |                                                          |      |
| 29 | Background and            | <a href="#">#6a</a> | Description of research question and justification for   | 7    |
| 30 | rationale                 |                     | undertaking the trial, including summary of relevant     |      |
| 31 |                           |                     | studies (published and unpublished) examining            |      |
| 32 |                           |                     | benefits and harms for each intervention                 |      |
| 33 |                           |                     |                                                          |      |
| 34 |                           |                     |                                                          |      |
| 35 |                           |                     |                                                          |      |
| 36 | Background and            | <a href="#">#6b</a> | Explanation for choice of comparators                    | n.a. |
| 37 | rationale: choice of      |                     |                                                          |      |
| 38 | comparators               |                     |                                                          |      |
| 39 |                           |                     |                                                          |      |
| 40 |                           |                     |                                                          |      |
| 41 | Objectives                | <a href="#">#7</a>  | Specific objectives or hypotheses                        | 9    |
| 42 |                           |                     |                                                          |      |
| 43 |                           |                     |                                                          |      |
| 44 | Trial design              | <a href="#">#8</a>  | Description of trial design including type of trial (eg, | 9    |
| 45 |                           |                     | parallel group, crossover, factorial, single group),     |      |
| 46 |                           |                     | allocation ratio, and framework (eg, superiority,        |      |
| 47 |                           |                     | equivalence, non-inferiority, exploratory)               |      |
| 48 |                           |                     |                                                          |      |
| 49 |                           |                     |                                                          |      |
| 50 |                           |                     |                                                          |      |
| 51 | <b>Methods:</b>           |                     |                                                          |      |
| 52 | <b>Participants,</b>      |                     |                                                          |      |
| 53 | <b>interventions, and</b> |                     |                                                          |      |
| 54 | <b>outcomes</b>           |                     |                                                          |      |
| 55 |                           |                     |                                                          |      |
| 56 |                           |                     |                                                          |      |
| 57 | Study setting             | <a href="#">#9</a>  | Description of study settings (eg, community clinic,     | 9    |
| 58 |                           |                     |                                                          |      |
| 59 |                           |                     |                                                          |      |
| 60 |                           |                     |                                                          |      |

|    |                      |                                                                             |      |
|----|----------------------|-----------------------------------------------------------------------------|------|
| 1  |                      | academic hospital) and list of countries where data                         |      |
| 2  |                      | will be collected. Reference to where list of study                         |      |
| 3  |                      | sites can be obtained                                                       |      |
| 4  |                      |                                                                             |      |
| 5  | Eligibility criteria | <a href="#">#10</a> Inclusion and exclusion criteria for participants. If   | 10   |
| 6  |                      | applicable, eligibility criteria for study centres and                      |      |
| 7  |                      | individuals who will perform the interventions (eg,                         |      |
| 8  |                      | surgeons, psychotherapists)                                                 |      |
| 9  |                      |                                                                             |      |
| 10 |                      |                                                                             |      |
| 11 |                      |                                                                             |      |
| 12 | Interventions:       | <a href="#">#11a</a> Interventions for each group with sufficient detail to | 10   |
| 13 | description          | allow replication, including how and when they will                         |      |
| 14 |                      | be administered                                                             |      |
| 15 |                      |                                                                             |      |
| 16 |                      |                                                                             |      |
| 17 | Interventions:       | <a href="#">#11b</a> Criteria for discontinuing or modifying allocated      | n.a. |
| 18 | modifications        | interventions for a given trial participant (eg, drug                       |      |
| 19 |                      | dose change in response to harms, participant                               |      |
| 20 |                      | request, or improving / worsening disease)                                  |      |
| 21 |                      |                                                                             |      |
| 22 |                      |                                                                             |      |
| 23 |                      |                                                                             |      |
| 24 | Interventions:       | <a href="#">#11c</a> Strategies to improve adherence to intervention        | n.a. |
| 25 | adherence            | protocols, and any procedures for monitoring                                |      |
| 26 |                      | adherence (eg, drug tablet return; laboratory tests)                        |      |
| 27 |                      |                                                                             |      |
| 28 |                      |                                                                             |      |
| 29 |                      |                                                                             |      |
| 30 | Interventions:       | <a href="#">#11d</a> Relevant concomitant care and interventions that       | 10   |
| 31 | concomitant care     | are permitted or prohibited during the trial                                |      |
| 32 |                      |                                                                             |      |
| 33 |                      |                                                                             |      |
| 34 | Outcomes             | <a href="#">#12</a> Primary, secondary, and other outcomes, including       | 11   |
| 35 |                      | the specific measurement variable (eg, systolic                             |      |
| 36 |                      | blood pressure), analysis metric (eg, change from                           |      |
| 37 |                      | baseline, final value, time to event), method of                            |      |
| 38 |                      | aggregation (eg, median, proportion), and time                              |      |
| 39 |                      | point for each outcome. Explanation of the clinical                         |      |
| 40 |                      | relevance of chosen efficacy and harm outcomes is                           |      |
| 41 |                      | strongly recommended                                                        |      |
| 42 |                      |                                                                             |      |
| 43 |                      |                                                                             |      |
| 44 |                      |                                                                             |      |
| 45 |                      |                                                                             |      |
| 46 | Participant timeline | <a href="#">#13</a> Time schedule of enrolment, interventions               | 13   |
| 47 |                      | (including any run-ins and washouts), assessments,                          |      |
| 48 |                      | and visits for participants. A schematic diagram is                         |      |
| 49 |                      | highly recommended (see Figure)                                             |      |
| 50 |                      |                                                                             |      |
| 51 |                      |                                                                             |      |
| 52 |                      |                                                                             |      |
| 53 | Sample size          | <a href="#">#14</a> Estimated number of participants needed to              | 15   |
| 54 |                      | achieve study objectives and how it was                                     |      |
| 55 |                      | determined, including clinical and statistical                              |      |
| 56 |                      | assumptions supporting any sample size                                      |      |
| 57 |                      |                                                                             |      |
| 58 |                      |                                                                             |      |
| 59 |                      |                                                                             |      |
| 60 |                      |                                                                             |      |

calculations

1  
2  
3 Recruitment [#15](#) Strategies for achieving adequate participant 16  
4 enrolment to reach target sample size  
5

6 **Methods:**

7 **Assignment of**  
8 **interventions (for**  
9 **controlled trials)**  
10  
11

12  
13 Allocation: sequence [#16a](#) Method of generating the allocation sequence (eg, n.a.  
14 generation computer-generated random numbers), and list of  
15 of any factors for stratification. To reduce predictability  
16 of a random sequence, details of any planned  
17 restriction (eg, blocking) should be provided in a  
18 separate document that is unavailable to those who  
19 enrol participants or assign interventions  
20  
21  
22

23  
24 Allocation [#16b](#) Mechanism of implementing the allocation n.a.  
25 concealment sequence (eg, central telephone; sequentially  
26 mechanism numbered, opaque, sealed envelopes), describing  
27 any steps to conceal the sequence until  
28 interventions are assigned  
29  
30  
31

32  
33 Allocation: [#16c](#) Who will generate the allocation sequence, who will n.a.  
34 implementation enrol participants, and who will assign participants  
35 to interventions  
36  
37

38 Blinding (masking) [#17a](#) Who will be blinded after assignment to n.a.  
39 interventions (eg, trial participants, care providers,  
40 outcome assessors, data analysts), and how  
41  
42

43 Blinding (masking): [#17b](#) If blinded, circumstances under which unblinding is n.a.  
44 emergency permissible, and procedure for revealing a  
45 unblinding participant's allocated intervention during the trial  
46  
47

48 **Methods: Data**  
49 **collection,**  
50 **management, and**  
51 **analysis**  
52  
53

54  
55 Data collection plan [#18a](#) Plans for assessment and collection of outcome, 16  
56 baseline, and other trial data, including any related  
57 processes to promote data quality (eg, duplicate  
58  
59

measurements, training of assessors) and a description of study instruments (eg, questionnaires, laboratory tests) along with their reliability and validity, if known. Reference to where data collection forms can be found, if not in the protocol

|    |                        |                      |                                                          |
|----|------------------------|----------------------|----------------------------------------------------------|
| 1  |                        |                      |                                                          |
| 2  |                        |                      |                                                          |
| 3  |                        |                      |                                                          |
| 4  |                        |                      |                                                          |
| 5  |                        |                      |                                                          |
| 6  |                        |                      |                                                          |
| 7  |                        |                      |                                                          |
| 8  |                        |                      |                                                          |
| 9  |                        |                      |                                                          |
| 10 | Data collection plan:  | <a href="#">#18b</a> | Plans to promote participant retention and complete      |
| 11 | retention              |                      | follow-up, including list of any outcome data to be      |
| 12 |                        |                      | collected for participants who discontinue or deviate    |
| 13 |                        |                      | from intervention protocols                              |
| 14 |                        |                      |                                                          |
| 15 |                        |                      |                                                          |
| 16 | Data management        | <a href="#">#19</a>  | Plans for data entry, coding, security, and storage,     |
| 17 |                        |                      | including any related processes to promote data          |
| 18 |                        |                      | quality (eg, double data entry; range checks for         |
| 19 |                        |                      | data values). Reference to where details of data         |
| 20 |                        |                      | management procedures can be found, if not in the        |
| 21 |                        |                      | protocol                                                 |
| 22 |                        |                      |                                                          |
| 23 |                        |                      |                                                          |
| 24 |                        |                      |                                                          |
| 25 |                        |                      |                                                          |
| 26 | Statistics: outcomes   | <a href="#">#20a</a> | Statistical methods for analysing primary and            |
| 27 |                        |                      | secondary outcomes. Reference to where other             |
| 28 |                        |                      | details of the statistical analysis plan can be found,   |
| 29 |                        |                      | if not in the protocol                                   |
| 30 |                        |                      |                                                          |
| 31 |                        |                      |                                                          |
| 32 |                        |                      |                                                          |
| 33 | Statistics: additional | <a href="#">#20b</a> | Methods for any additional analyses (eg, subgroup        |
| 34 | analyses               |                      | and adjusted analyses)                                   |
| 35 |                        |                      |                                                          |
| 36 |                        |                      |                                                          |
| 37 | Statistics: analysis   | <a href="#">#20c</a> | Definition of analysis population relating to protocol   |
| 38 | population and         |                      | non-adherence (eg, as randomised analysis), and          |
| 39 | missing data           |                      | any statistical methods to handle missing data (eg,      |
| 40 |                        |                      | multiple imputation)                                     |
| 41 |                        |                      |                                                          |
| 42 |                        |                      |                                                          |
| 43 |                        |                      |                                                          |
| 44 | <b>Methods:</b>        |                      |                                                          |
| 45 | <b>Monitoring</b>      |                      |                                                          |
| 46 |                        |                      |                                                          |
| 47 |                        |                      |                                                          |
| 48 | Data monitoring:       | <a href="#">#21a</a> | Composition of data monitoring committee (DMC);          |
| 49 | formal committee       |                      | summary of its role and reporting structure;             |
| 50 |                        |                      | statement of whether it is independent from the          |
| 51 |                        |                      | sponsor and competing interests; and reference to        |
| 52 |                        |                      | where further details about its charter can be found,    |
| 53 |                        |                      | if not in the protocol. Alternatively, an explanation of |
| 54 |                        |                      | why a DMC is not needed                                  |
| 55 |                        |                      |                                                          |
| 56 |                        |                      |                                                          |
| 57 |                        |                      |                                                          |
| 58 |                        |                      |                                                          |
| 59 |                        |                      |                                                          |
| 60 |                        |                      |                                                          |



|    |                      |                      |                                                         |      |
|----|----------------------|----------------------|---------------------------------------------------------|------|
| 1  | Data monitoring:     | <a href="#">#21b</a> | Description of any interim analyses and stopping        | n.a. |
| 2  | interim analysis     |                      | guidelines, including who will have access to these     |      |
| 3  |                      |                      | interim results and make the final decision to          |      |
| 4  |                      |                      | terminate the trial                                     |      |
| 5  |                      |                      |                                                         |      |
| 6  |                      |                      |                                                         |      |
| 7  |                      |                      |                                                         |      |
| 8  | Harms                | <a href="#">#22</a>  | Plans for collecting, assessing, reporting, and         | 14   |
| 9  |                      |                      | managing solicited and spontaneously reported           |      |
| 10 |                      |                      | adverse events and other unintended effects of trial    |      |
| 11 |                      |                      | interventions or trial conduct                          |      |
| 12 |                      |                      |                                                         |      |
| 13 |                      |                      |                                                         |      |
| 14 | Auditing             | <a href="#">#23</a>  | Frequency and procedures for auditing trial             | 18   |
| 15 |                      |                      | conduct, if any, and whether the process will be        |      |
| 16 |                      |                      | independent from investigators and the sponsor          |      |
| 17 |                      |                      |                                                         |      |
| 18 |                      |                      |                                                         |      |
| 19 |                      |                      |                                                         |      |
| 20 | <b>Ethics and</b>    |                      |                                                         |      |
| 21 | <b>dissemination</b> |                      |                                                         |      |
| 22 |                      |                      |                                                         |      |
| 23 |                      |                      |                                                         |      |
| 24 | Research ethics      | <a href="#">#24</a>  | Plans for seeking research ethics committee /           | 21   |
| 25 | approval             |                      | institutional review board (REC / IRB) approval         |      |
| 26 |                      |                      |                                                         |      |
| 27 | Protocol             | <a href="#">#25</a>  | Plans for communicating important protocol              | 21   |
| 28 | amendments           |                      | modifications (eg, changes to eligibility criteria,     |      |
| 29 |                      |                      | outcomes, analyses) to relevant parties (eg,            |      |
| 30 |                      |                      | investigators, REC / IRBs, trial participants, trial    |      |
| 31 |                      |                      | registries, journals, regulators)                       |      |
| 32 |                      |                      |                                                         |      |
| 33 |                      |                      |                                                         |      |
| 34 |                      |                      |                                                         |      |
| 35 |                      |                      |                                                         |      |
| 36 | Consent or assent    | <a href="#">#26a</a> | Who will obtain informed consent or assent from         | 21   |
| 37 |                      |                      | potential trial participants or authorised surrogates,  |      |
| 38 |                      |                      | and how (see Item 32)                                   |      |
| 39 |                      |                      |                                                         |      |
| 40 |                      |                      |                                                         |      |
| 41 | Consent or assent:   | <a href="#">#26b</a> | Additional consent provisions for collection and use    | n.a. |
| 42 | ancillary studies    |                      | of participant data and biological specimens in         |      |
| 43 |                      |                      | ancillary studies, if applicable                        |      |
| 44 |                      |                      |                                                         |      |
| 45 |                      |                      |                                                         |      |
| 46 | Confidentiality      | <a href="#">#27</a>  | How personal information about potential and            | 22   |
| 47 |                      |                      | enrolled participants will be collected, shared, and    |      |
| 48 |                      |                      | maintained in order to protect confidentiality before,  |      |
| 49 |                      |                      | during, and after the trial                             |      |
| 50 |                      |                      |                                                         |      |
| 51 |                      |                      |                                                         |      |
| 52 |                      |                      |                                                         |      |
| 53 | Declaration of       | <a href="#">#28</a>  | Financial and other competing interests for principal   | 22   |
| 54 | interests            |                      | investigators for the overall trial and each study site |      |
| 55 |                      |                      |                                                         |      |
| 56 |                      |                      |                                                         |      |
| 57 | Data access          | <a href="#">#29</a>  | Statement of who will have access to the final trial    | 22   |
| 58 |                      |                      | dataset, and disclosure of contractual agreements       |      |
| 59 |                      |                      |                                                         |      |
| 60 |                      |                      |                                                         |      |

that limit such access for investigators

|    |                       |                      |                                                             |
|----|-----------------------|----------------------|-------------------------------------------------------------|
| 1  |                       |                      |                                                             |
| 2  | Ancillary and post    | <a href="#">#30</a>  | Provisions, if any, for ancillary and post-trial care, n.a. |
| 3  | trial care            |                      |                                                             |
| 4  |                       |                      | and for compensation to those who suffer harm               |
| 5  |                       |                      | from trial participation                                    |
| 6  |                       |                      |                                                             |
| 7  | Dissemination policy: | <a href="#">#31a</a> | Plans for investigators and sponsor to communicate 23       |
| 8  | trial results         |                      | trial results to participants, healthcare professionals,    |
| 9  |                       |                      | the public, and other relevant groups (eg, via              |
| 10 |                       |                      | publication, reporting in results databases, or other       |
| 11 |                       |                      | data sharing arrangements), including any                   |
| 12 |                       |                      | publication restrictions                                    |
| 13 |                       |                      |                                                             |
| 14 | Dissemination policy: | <a href="#">#31b</a> | Authorship eligibility guidelines and any intended 23       |
| 15 | authorship            |                      | use of professional writers                                 |
| 16 |                       |                      |                                                             |
| 17 | Dissemination policy: | <a href="#">#31c</a> | Plans, if any, for granting public access to the full 22    |
| 18 | reproducible          |                      | protocol, participant-level dataset, and statistical        |
| 19 | research              |                      | code                                                        |
| 20 |                       |                      |                                                             |
| 21 |                       |                      |                                                             |
| 22 |                       |                      |                                                             |
| 23 |                       |                      |                                                             |
| 24 |                       |                      |                                                             |
| 25 |                       |                      |                                                             |
| 26 |                       |                      |                                                             |
| 27 | <b>Appendices</b>     |                      |                                                             |
| 28 |                       |                      |                                                             |
| 29 | Informed consent      | <a href="#">#32</a>  | Model consent form and other related Supplementary          |
| 30 | materials             |                      | documentation given to participants and authorised file     |
| 31 |                       |                      | surrogates                                                  |
| 32 |                       |                      |                                                             |
| 33 |                       |                      |                                                             |
| 34 | Biological specimens  | <a href="#">#33</a>  | Plans for collection, laboratory evaluation, and n.a.       |
| 35 |                       |                      | storage of biological specimens for genetic or              |
| 36 |                       |                      | molecular analysis in the current trial and for future      |
| 37 |                       |                      | use in ancillary studies, if applicable                     |
| 38 |                       |                      |                                                             |
| 39 |                       |                      |                                                             |
| 40 |                       |                      |                                                             |

41 None The SPIRIT checklist is distributed under the terms of the Creative Commons Attribution  
 42 License CC-BY-ND 3.0. This checklist can be completed online using <https://www.goodreports.org/>, a  
 43 tool made by the [EQUATOR Network](#) in collaboration with [Penelope.ai](#)  
 44  
 45  
 46  
 47  
 48  
 49  
 50  
 51  
 52  
 53  
 54  
 55  
 56  
 57  
 58  
 59  
 60

# BMJ Open

## Protocol for the ARCR\_Pred cohort-study: Swiss-wide multicenter evaluation and prediction of core outcomes in arthroscopic rotator cuff repair

|                               |                                                                                                                                                                                                                                                                                                                                                                                                                                                                                                                                                                                                                                                                                                                                                                                                                                                                                                                                                                                                                                                                                                                                                                                                                                                                                                                                                                                                                                                                                                                                                                                                                                                                                                                                                                                                                                                                                                                                                                                                                                                                                                                                                                                                                                                                                                                                                                 |
|-------------------------------|-----------------------------------------------------------------------------------------------------------------------------------------------------------------------------------------------------------------------------------------------------------------------------------------------------------------------------------------------------------------------------------------------------------------------------------------------------------------------------------------------------------------------------------------------------------------------------------------------------------------------------------------------------------------------------------------------------------------------------------------------------------------------------------------------------------------------------------------------------------------------------------------------------------------------------------------------------------------------------------------------------------------------------------------------------------------------------------------------------------------------------------------------------------------------------------------------------------------------------------------------------------------------------------------------------------------------------------------------------------------------------------------------------------------------------------------------------------------------------------------------------------------------------------------------------------------------------------------------------------------------------------------------------------------------------------------------------------------------------------------------------------------------------------------------------------------------------------------------------------------------------------------------------------------------------------------------------------------------------------------------------------------------------------------------------------------------------------------------------------------------------------------------------------------------------------------------------------------------------------------------------------------------------------------------------------------------------------------------------------------|
| Journal:                      | <i>BMJ Open</i>                                                                                                                                                                                                                                                                                                                                                                                                                                                                                                                                                                                                                                                                                                                                                                                                                                                                                                                                                                                                                                                                                                                                                                                                                                                                                                                                                                                                                                                                                                                                                                                                                                                                                                                                                                                                                                                                                                                                                                                                                                                                                                                                                                                                                                                                                                                                                 |
| Manuscript ID                 | bmjopen-2020-045702.R1                                                                                                                                                                                                                                                                                                                                                                                                                                                                                                                                                                                                                                                                                                                                                                                                                                                                                                                                                                                                                                                                                                                                                                                                                                                                                                                                                                                                                                                                                                                                                                                                                                                                                                                                                                                                                                                                                                                                                                                                                                                                                                                                                                                                                                                                                                                                          |
| Article Type:                 | Protocol                                                                                                                                                                                                                                                                                                                                                                                                                                                                                                                                                                                                                                                                                                                                                                                                                                                                                                                                                                                                                                                                                                                                                                                                                                                                                                                                                                                                                                                                                                                                                                                                                                                                                                                                                                                                                                                                                                                                                                                                                                                                                                                                                                                                                                                                                                                                                        |
| Date Submitted by the Author: | 20-Mar-2021                                                                                                                                                                                                                                                                                                                                                                                                                                                                                                                                                                                                                                                                                                                                                                                                                                                                                                                                                                                                                                                                                                                                                                                                                                                                                                                                                                                                                                                                                                                                                                                                                                                                                                                                                                                                                                                                                                                                                                                                                                                                                                                                                                                                                                                                                                                                                     |
| Complete List of Authors:     | <p>Audigé, Laurent ; Schulthess Klinik, Research and Development; University Hospital Basel, Orthopaedic Surgery and Traumatology</p> <p>Bucher, Heiner; University Hospital Basel, Basel Institute for Clinical Epidemiology and Biostatistics</p> <p>Aghlmandi, Soheila; University Hospital Basel, Basel Institute for Clinical Epidemiology and Biostatistics</p> <p>Stojanov, Thomas; University Hospital Basel, Orthopaedic Surgery and Traumatology; University Hospital Basel, Basel Institute for Clinical Epidemiology and Biostatistics</p> <p>Schwappach, David; Patient Safety Foundation; University of Bern, Institute of Social and Preventive Medicine</p> <p>Hunziker, Sabina; University Hospital Basel, Medical Communication / Psychosomatic Medicine</p> <p>Candrian, Christian; Ospedale Regionale di Lugano, Trauma and Ortho Unit</p> <p>Cunningham, Gregory; Hirslanden Clinique La Colline, Shoulder Center; Geneva University Hospitals, Division of Orthopaedics and Trauma Surgery, Department of Surgery</p> <p>Durchholz, Holger; Klinik Gut Sankt Moritz</p> <p>Eid, Karim; Baden Cantonal Hospital, Clinic for Orthopaedics and Traumatology</p> <p>Flury, Matthias; In-Motion, Center for Orthopaedics and Neurosurgery</p> <p>Jost, B; Cantonal Hospital of St.Gallen, Clinic for Orthopaedic Surgery and Traumatology of the Musculoskeletal system</p> <p>Ladermann, Alexandre; La Tour Hospital, Division of Orthopaedics and Trauma Surgery; Geneva University Hospitals, Division of Orthopaedics and Trauma Surgery, Department of Surgery</p> <p>Moor, Beat; Hôpital de Martigny Centre Hospitalier du Valais Romand, Service for Orthopaedics and Traumatology of the Musculoskeletal system</p> <p>Moroder, Philipp; Charite Universitätsmedizin Berlin, Department of Shoulder and Elbow Surgery, Center for Musculoskeletal Surgery,</p> <p>Rosso, Claudio; Arthro Medics, Shoulder and Elbow Center</p> <p>Schär, Michael; Inselspital Universitätsspital Bern, Department of Orthopaedic Surgery and Traumatology</p> <p>Scheibel, Markus; Schulthess Klinik, Shoulder and Elbow Surgery,; Charité Universitätsmedizin Berlin, Department for Shoulder and Elbow surgery - Center for Musculoskeletal Surgery- Campus Virchow</p> <p>Spormann, Christophe; Endoclinic, Center for Endoprosthesis and Joint</p> |

|                                 |                                                                                                                                                                                                                                                                                                                                                                                                                                    |
|---------------------------------|------------------------------------------------------------------------------------------------------------------------------------------------------------------------------------------------------------------------------------------------------------------------------------------------------------------------------------------------------------------------------------------------------------------------------------|
|                                 | Surgery<br>Suter, Thomas; Canton Hospital Baselland, Orthopaedic Shoulder and Elbow<br>Wieser , Karl ; University of Zurich, Department of Orthopaedics, Balgrist University Hospital<br>Zumstein, Matthias; Orthopaedics Sonnenhof, Shoulder, Elbow and Orthopaedic Sports Medicine<br>ARCR_Pred Study Group, Name; University Hospital Basel<br>Müller, Andreas; University Hospital Basel, Orthopaedic Surgery and Traumatology |
| <b>Primary Subject Heading</b>: | Surgery                                                                                                                                                                                                                                                                                                                                                                                                                            |
| Secondary Subject Heading:      | Epidemiology, Evidence based practice                                                                                                                                                                                                                                                                                                                                                                                              |
| Keywords:                       | ORTHOPAEDIC & TRAUMA SURGERY, Musculoskeletal disorders < ORTHOPAEDIC & TRAUMA SURGERY, Shoulder < ORTHOPAEDIC & TRAUMA SURGERY                                                                                                                                                                                                                                                                                                    |
|                                 |                                                                                                                                                                                                                                                                                                                                                                                                                                    |

SCHOLARONE™  
Manuscripts



I, the Submitting Author has the right to grant and does grant on behalf of all authors of the Work (as defined in the below author licence), an exclusive licence and/or a non-exclusive licence for contributions from authors who are: i) UK Crown employees; ii) where BMJ has agreed a CC-BY licence shall apply, and/or iii) in accordance with the terms applicable for US Federal Government officers or employees acting as part of their official duties; on a worldwide, perpetual, irrevocable, royalty-free basis to BMJ Publishing Group Ltd ("BMJ") its licensees and where the relevant Journal is co-owned by BMJ to the co-owners of the Journal, to publish the Work in this journal and any other BMJ products and to exploit all rights, as set out in our [licence](#).

The Submitting Author accepts and understands that any supply made under these terms is made by BMJ to the Submitting Author unless you are acting as an employee on behalf of your employer or a postgraduate student of an affiliated institution which is paying any applicable article publishing charge ("APC") for Open Access articles. Where the Submitting Author wishes to make the Work available on an Open Access basis (and intends to pay the relevant APC), the terms of reuse of such Open Access shall be governed by a Creative Commons licence – details of these licences and which [Creative Commons](#) licence will apply to this Work are set out in our licence referred to above.

Other than as permitted in any relevant BMJ Author's Self Archiving Policies, I confirm this Work has not been accepted for publication elsewhere, is not being considered for publication elsewhere and does not duplicate material already published. I confirm all authors consent to publication of this Work and authorise the granting of this licence.

1  
2  
3 **1 Protocol for the ARCR\_Pred cohort-study: Swiss-wide multicenter evaluation and**  
4 **2 prediction of core outcomes in arthroscopic rotator cuff repair**

5  
6  
7  
8  
9 4 Laurent Audigé<sup>1,2,3†</sup>, Heiner C. Bucher<sup>3</sup>, Soheila Aghlmandi<sup>3</sup>, Thomas Stojanov<sup>1,2,3</sup>, David  
10  
11 5 Schwappach<sup>4,5</sup>, Sabina Hunziker<sup>6</sup>, Christian Candrian<sup>7</sup>, Gregory Cunningham<sup>8,9</sup>, Holger  
12  
13 6 Durchholz<sup>10</sup>, Karim Eid<sup>11</sup>, Matthias Flury<sup>12</sup>, Bernhard Jost<sup>13</sup>, Alexandre Lädermann<sup>9,14</sup>, Beat  
14  
15 7 Moor<sup>15</sup>, Philipp Moroder<sup>16</sup>, Claudio Rosso<sup>17</sup>, Michael Schär<sup>18</sup>, Markus Scheibel<sup>16,19</sup>,  
16  
17 8 Christophe Spormann<sup>20</sup>, Thomas Suter<sup>21</sup>, Karl Wieser<sup>22</sup>, Matthias A. Zumstein<sup>23,24</sup>,  
18  
19 9 ARCR\_Pred Study Group\*, Andreas Müller<sup>1</sup>

20  
21  
22  
23  
24 **11 Author affiliations:**

- 25  
26 12 1. Orthopaedic Surgery and Traumatology, University Hospital of Basel, Basel, Switzerland  
27  
28 13 2. Research and Development Department, Schulthess Klinik, Zurich, Switzerland  
29  
30 14 3. Basel Institute for Clinical Epidemiology and Biostatistics, University Hospital of Basel, Basel,  
31  
32 15 Switzerland  
33  
34 16 4. Swiss Patient Safety Foundation, Zurich, Switzerland  
35  
36 17 5. Institute of Social and Preventive Medicine (ISPM), University of Bern, Bern, Switzerland  
37  
38 18 6. Medical Communication / Psychosomatic, University Hospital of Basel, Basel, Switzerland  
39  
40 19 7. Trauma and Ortho Unit, Ospedale Regionale di Lugano, Lugano, Switzerland  
41  
42 20 8. Shoulder Center, Hirslanden Clinique la Colline, Geneva, Switzerland  
43  
44 21 9. Division of Orthopaedics and Trauma Surgery, Department of Surgery, Geneva University  
45  
46 22 Hospitals, Geneva, Switzerland  
47  
48 23 10. Klinik Gut, St Moritz, Switzerland  
49  
50 24 11. Clinic for Orthopaedics and Traumatology, Cantonal Hospital of Baden, Baden, Switzerland  
51  
52 25 12. Center for Orthopaedics and Neurosurgery, In-Motion, Wallisellen, Switzerland  
53  
54 26 13. Clinic for Orthopaedic Surgery and Traumatology of the Musculoskeletal system , Cantonal  
55  
56 27 Hospital of St.Gallen, St.Gallen, Switzerland  
57  
58 28 14. Division of Orthopaedics and Trauma Surgery, La Tour Hospital, Meyrin, Switzerland  
59  
60 29 15. Service for Orthopaedics and Traumatology of the Musculoskeletal system , Hôpital du Valais –  
30 Centre Hospitalier du Valais Romand, Martigny, Switzerland

- 1  
2  
3 31 16. Department for Shoulder and Elbow surgery - Center for Musculoskeletal Surgery- Campus  
4 32 Virchow, Charité Medicine University, Berlin, DE  
5  
6 33 17. Shoulder and Elbow Center, ARTHRO Medics, Basel, Switzerland  
7  
8 34 18. Department of Orthopaedic Surgery and Traumatology, Inselspital, Bern University Hospital,  
9  
10 35 University of Bern, Switzerland  
11  
12 36 19. Shoulder and Elbow Surgery, Schulthess Klinik, Zurich, Switzerland  
13  
14 37 20. Center for Endoprosthetics and Joint Surgery, Endoclinic, Zürich, Switzerland  
15  
16 38 21. Orthopaedic Shoulder and Elbow, Canton Hospital Baselland, Bruderholz, Switzerland  
17  
18 39 22. Department of Orthopaedics, Balgrist University Hospital, University of Zurich, Switzerland  
19  
20 40 23. Shoulder, Elbow and Orthopaedic Sports Medicine, Orthopaedics Sonnenhof, Bern, Switzerland  
21  
22 41 24. Stiftung Lindenhof, Campus SLB, Swiss Institute for Translational and Entrepreneurial Medicine,  
23  
24 42 Bern, Switzerland  
25  
26 43

27 44 †Corresponding author:

28  
29 45 Laurent Audigé, DVM PhD

30  
31 46 Schulthess Klinik

32  
33 47 Research and Development - Shoulder and Elbow Surgery

34  
35 48 Lengghalde 2, CH-8008 Zurich, Switzerland

36  
37 49 Phone: +41 44 385 7580; Fax: +41 44 385 7590

38  
39 50 E-mail: [laurent.audige@kws.ch](mailto:laurent.audige@kws.ch)  
40  
41  
42  
43  
44  
45  
46  
47  
48  
49  
50  
51  
52  
53  
54  
55  
56  
57  
58  
59  
60

51

52

53 \* Other members of the ARCR\_Pred Study Group are listed below per site:

54 **ARTHRO Medics, Basel, Switzerland (ART):** Jannine Buchschacher, Lena Fankhauser,

55 Corinne Eicher, Gernot Willscheid; **Charité Medicine University, Berlin, Germany (BER):**

56 Doruk Akgün, Kathi Thiele, Marvin Minkus, Victor Danzinger, Katrin Karpinski; **Canton**

57 **Hospital Baselland, Bruderholz, Switzerland (BRU):** Sebastian Mueller, Claudia Haag-

58 Schumacher; **Centre Hospitalier du Valais Romand, Martigny, Switzerland (CHV):**

59 Viviane Steffen, Sarah Fournier, Deborah Marietan, Sebastien Pawlak; **Endoclinic, Zürich,**



1  
2  
3 60 **Switzerland (END):** Britta Hansen, Ferdinand Lovrek, Marco Zanetti, Nadja Mamisch; **Klinik**  
4  
5 61 **Gut, St Moritz, Switzerland (GUT):** Christian Steiner, Georg Ahlbäumer, Jakob Bräm, Jens  
6  
7 62 Fischer, Alexander Delvendahl; **Hirslanden Clinique la Colline, Geneva, Switzerland**  
8  
9 63 **(HIR):** Patricia Simao, Abed Khourani; **La Tour Hospital, Meyrin, Switzerland (HUG):**  
10  
11 64 Anne-Sophie Foucault, Frank Kolo; **Inselspital, Bern University Hospital, Bern,**  
12  
13 65 **Switzerland (INB):** Adrian Schenk, Johannes Weihs, Remy Flückiger, Philipp Scacchi, Paolo  
14  
15 66 Lombardo; **In-Motion, Wallisellen, Switzerland (INM):** Larissa Hübscher, Ralph Berther,  
16  
17 67 Christine Ehrmann; **Cantonal Hospital of Baden, Baden, Switzerland (KSB):** Raffaella  
18  
19 68 Nobs, Richard Niehaus, Nisha Grünberger, Philipp Kriechling, Susanne Bensler; **Schulthess**  
20  
21 69 **Klinik, Zurich, Switzerland (KWS):** Hans-Kaspar Schwyzer, Fabrizio Moro, Michael  
22  
23 70 Glanzmann, Barbara Wirth, Christian Jung, Florian Freislederer, Manuela Nötzli, Frederik  
24  
25 71 Bellmann, Franz Anne, Jörg Oswald, Alex Marzel, Cécile Grobet, Marije de Jong, Martina  
26  
27 72 Wehrli, Jan Schätz; **Ospedale Regionale di Lugano, Lugano, Switzerland (LUG):**  
28  
29 73 Francesco Marbach, Marco Delcogliano, Davide Previtali, Florian Schönweger, Elena Porro,  
30  
31 74 Gabriela Induni-Lang, Giuseppe Filardo, Filippo Del Grande, Pietro Feltri, Schiavon  
32  
33 75 Guglielmo; **Cantonal Hospital of St.Gallen, St.Gallen, Switzerland (SGA):** Christian  
34  
35 76 Spross, Martin Olach, Michael Badulescu, Vilijam Zdravkovic, Stephanie Lüscher, Jörg  
36  
37 77 Scheler, Lena Ohrström; **Orthopädie Sonnenhof, Berne, Switzerland (SON):** Annabel  
38  
39 78 Hayoz, Frederick Schuster, Julia Müller-Lebschi; **Balgrist University Hospital, Zurich,**  
40  
41 79 **Switzerland (UKB):** Christian Gerber, Samy Bouaicha, Paul Borbas, Anita Hasler, Florian  
42  
43 80 Grubhofer, Sabrina Catanzaro, Sabine Wyss, Reto Sutter; **University Hospital of Basel,**  
44  
45 81 **Basel, Switzerland (USB):** Mohy Taha, Cornelia Baum, Ilona Ahlborn, Simone Hatz, Giorgio  
46  
47 82 Tamborrini-Schütz; **University Library Basel, Basel, Switzerland:** Christian Appenzeller-  
48  
49 83 Herzog.  
50  
51  
52  
53 84  
54  
55  
56  
57  
58  
59  
60

1  
2  
3 85 **Administrative information**

4 86 **Title** Protocol for the ARCR\_Pred cohort-study: Swiss-wide multicenter evaluation and  
5  
6  
7 87 prediction of core outcomes in arthroscopic rotator cuff repair  
8

9 88

10  
11 89 **Trial registration** ClinicalTrial.gov registration number NCT04321005  
12

13 90

14  
15 91 **Protocol version** Version 2 (13.12.2019)  
16

17 92

18  
19 93 **Funding** This project is funded by the Swiss National Science Foundation (SNF Project ID  
20  
21 94 320030\_184959, <http://p3.snf.ch/project-184959>). A complementary grant was provided by  
22  
23 95 Swiss Orthopedics. The sites Charité Medicine University, Berlin, Germany (BER) and  
24  
25 96 University Clinic Balgrist, Zurich, Switzerland (UKB) are funding their own participation in the  
26  
27 97 project.  
28

29 98

30  
31  
32 99 **Roles and responsibilities**  
33

34 100 LA and AM are the initiators and project leaders. LA, AM, HB, SA, DS and SH were involved  
35  
36 101 in the study design, which was reviewed and commented by principal investigators CC, GC,  
37  
38 102 HD, KE, MF, BJ, AL, BM, PM, CR, MS, MS, CS, T Suter, KW and MZ.  
39

40 103 Preparation of the manuscript was done by LA, AM, SA and T Stojanov. HB, DS and SH  
41  
42 104 edited and critically revised the paper. All authors have read and approved the manuscript.  
43  
44 105 LA is the guarantor of the manuscript.  
45

46 106 This is an investigator initiated project at the University Hospital of Basel. The principal  
47  
48 107 investigator and project leader (AM) is the official sponsor representative for the project and  
49  
50 108 was involved in all phases of the project from its conception to the current implementation  
51  
52 109 steps. The project initiators and project leaders (LA and AM) have ultimate authority over any  
53  
54 110 of the project activities.  
55

56  
57 111 A project scientific board (PSB) comprises the project leaders (LA and AM), project  
58  
59 112 investigators at each site (CC, GC, HD, KE, MF, BJ, AL, BM, PM, CR, MS, MS, CS, T Suter,  
60

1  
2  
3 113 KW and MZ), and project partners (SA, HB, DS and SH). The PSB shall meet at specific time  
4  
5 114 points during the study: before the study start, after completion of recruitment and the 12-  
6  
7 115 month follow-up, and at the end of the study. The agenda of these meetings will focus on  
8  
9 116 (however is not limited to) patient enrollment and the completion of follow-up examinations  
10  
11 117 and questionnaires, the documentation process in REDCap, data quality issues  
12  
13 118 (completeness and consistency), monitoring activities, adverse event assessment and  
14  
15 119 management, baseline patient description, ranking of prognostic factors for prognostic  
16  
17 120 models, progress of data analysis, publication strategy and decisions regarding data sharing.  
18  
19 121 Between these meetings, communication will be maintained between the project coordinating  
20  
21 122 team and investigators via various channels including emails, quarterly newsletters, phone  
22  
23 123 calls and (video) conference calls as required.  
24  
25  
26 124

### 27 125 **Competing interests**

28 126 There are no competing interests for any author  
29  
30  
31  
32 127  
33  
34  
35  
36  
37  
38  
39  
40  
41  
42  
43  
44  
45  
46  
47  
48  
49  
50  
51  
52  
53  
54  
55  
56  
57  
58  
59  
60

1  
2  
3 128 **Abstract**

4 129 **Introduction** In the field of arthroscopic rotator cuff repair (ARCR), reporting standards of  
5  
6 130 published studies differ dramatically, notably concerning adverse events (AEs). In addition,  
7  
8 131 prognostic studies are overall methodologically poor, based on small datasets, and explore  
9  
10 132 only limited numbers of influencing factors. We aim to develop prognostic models for  
11  
12 133 individual ARCR patients, primarily for the patient-reported assessment of shoulder function  
13  
14 134 (Oxford Shoulder Score [OSS]) and the occurrence of shoulder stiffness 6 months after  
15  
16 135 surgery. We also aim to evaluate the use of a consensus Core Event Set (CES) for AEs and  
17  
18 136 validate a severity classification for these events, considering the patient's perspective.  
19  
20  
21 137

22  
23 138 **Methods and analysis** A cohort of 970 primary ARCR patients will be prospectively  
24  
25 139 documented from several Swiss and German orthopedic clinics up to 24 months  
26  
27 140 postoperatively. Patient clinical examinations at 6 and 12 months will include shoulder range  
28  
29 141 of motion and strength (Constant Score). Tendon repair integrity status will be assessed by  
30  
31 142 ultrasound at 12 months. Patient-reported questionnaires at 6, 12 and 24 months will  
32  
33 143 determine functional scores (Subjective Shoulder Value, OSS), anxiety and depression  
34  
35 144 scores, working status, sports activities, quality of life (EuroQol EQ-5D-5L). AEs will be  
36  
37 145 documented according to a CES. Prognostic models will be developed using an  
38  
39 146 internationally supported regression methodology. Multiple prognostic factors, including  
40  
41 147 patient baseline demographics, psychological, socioeconomic and clinical factors, rotator cuff  
42  
43 148 integrity, concomitant local findings, and (post)operative management factors will be  
44  
45 149 investigated.  
46  
47  
48  
49 150

50  
51 151 **Ethics and dissemination** This project contributes to the development of personalized risk  
52  
53 152 predictions for supporting the surgical decision process in ARCR. The consensus CES may  
54  
55 153 become an international reference for the reporting of complications in clinical studies and  
56  
57 154 registries. Ethical approval was obtained on April 1<sup>st</sup>, 2020, from the lead ethics committee  
58  
59  
60

1  
2  
3 155 (EKNZ, Basel Switzerland; ID: 2019-02076). All participants will provide informed, written  
4  
5 156 consent before enrollment in the study.

6  
7 157

### 8 9 158 **Strengths and limitations of this study**

- 10  
11 159 • Large prospective multicenter observation of routine care
- 12  
13 160 • Assessment of patient-reported outcomes (PROMs)
- 14  
15 161 • Implementation of an international core outcome set of adverse events (CES)
- 16  
17 162 • Internationally supported methodology for prognostic model development
- 18  
19 163 • Potential limited response to patient questionnaires at 24 months

20  
21  
22 164

### 23 24 165 **Introduction**

25  
26 166 Rotator cuff tears are one of the most common injuries of the shoulder joint, which may  
27  
28 167 cause pain and disability associated with severe restrictions in daily activities. Surgical repair  
29  
30 168 is indicated when nonoperative treatment fails or follows extended traumatic tears, notably  
31  
32 169 inactive patients without signs of advanced tendon degeneration or muscle fat infiltration <sup>1</sup>.  
33  
34 170 Clinical studies have demonstrated clinically-relevant improvement in shoulder function and  
35  
36 171 quality of life after arthroscopic rotator cuff tear repair (ARCR) <sup>2-5</sup>. The number of ARCRs has  
37  
38 172 increased over the last two decades <sup>6 7 8 9</sup> due to several contributing factors such as an  
39  
40 173 aging yet active population, improvements in operative repair techniques, and more liberal  
41  
42 174 indications for ARCRs.

43  
44  
45 175

46  
47 176 Not all patients, however, benefit from ARCR <sup>10</sup>. Patients may be affected by complications  
48  
49 177 and/or adverse events (AEs) like persistent pain, shoulder stiffness, infection, neurological  
50  
51 178 problems, and repair failures <sup>11 12</sup>. About 20% of patients may show, typically between 6 and  
52  
53 179 12 months following ARCR, a persistent rotator cuff defect <sup>13</sup>. Patients with healed tendons  
54  
55 180 may show better functional outcome after repair <sup>2 14 15</sup>. Postoperative shoulder stiffness, a  
56  
57 181 major complication reported to occur in 1.5% to 11.1% of ARCRs <sup>11</sup>, leads to limitations in  
58  
59 182 everyday activities, prolonged rehabilitation, and, in severe cases, to reoperation (capsular

1  
2  
3 183 release) <sup>16-18</sup>. Nonetheless, incident data on outcome and AEs are impaired by the  
4  
5 184 heterogeneity in definition and reporting <sup>13 19</sup>.

6  
7 185  
8  
9 186 Valid and representative data on the safety and effectiveness of ARCR are nonexistent at the  
10  
11 187 Swiss national level. However, such data is paramount for optimizing the indication and  
12  
13 188 outcome of ARCR, and for benchmarking orthopedic clinics. Reporting standards are a  
14  
15 189 prerequisite for outcome and safety data. Recently, a Core Outcome Set (COS) <sup>20</sup> was  
16  
17 190 defined for shoulder disorders, which includes inner core domains of pain, physical function  
18  
19 191 and activities, global perceived effect (a person's assessment of their recovery or degree of  
20  
21 192 improvement), and AEs <sup>21 22</sup>. A Core Event Set (CES) was developed by international  
22  
23 193 consensus in ARCR <sup>23 24</sup> and lay the ground for the current project.

24  
25  
26 194  
27  
28 195 Appropriate indication of ARCR and judgment on risks for AEs or unsatisfactory patient  
29  
30 196 outcomes rely on validated clinical prediction tools <sup>25 26</sup>, which are still sparse in the field of  
31  
32 197 surgical repair of a rotator cuff tear. Currently existing models focus on early surgical repair  
33  
34 198 <sup>27</sup>, tendon healing <sup>28 29</sup> or shoulder functional outcomes <sup>30</sup>. A model for shoulder stiffness  
35  
36 199 included patients with various shoulder pathologies and surgeries <sup>31</sup>. Furthermore, individual  
37  
38 200 outcome predictions in ARCR require the identification of relevant patient and management  
39  
40 201 factors. Several systematic reviews have highlighted the general lack of qualitative studies  
41  
42 202 focused on prognostic factors for ARCR outcomes <sup>32-36</sup>. In addition, we have observed the  
43  
44 203 substantial heterogeneity in terms of applied methodology, core outcomes and studied  
45  
46 204 prognostic factors, where certain factors (e.g., age, tear size, muscle degeneration, smoking)  
47  
48 205 are given greater focus over others (e.g., sex, traumatic onset). The reviews highlight the  
49  
50 206 need for more robust prospective studies to include additional patient-reported outcomes in a  
51  
52 207 multivariable context.

53  
54  
55 208  
56  
57  
58  
59  
60

## 209 **Objectives**

210 *The overall objective* is to establish a prospective cohort of patients undergoing ARCR with  
211 standardized data collection and follow-up for the evaluation and prediction of targeted core  
212 safety, and clinical and patient-reported outcome parameters that are to be routinely  
213 collected in standard clinical care.

214  
215 *The primary objective* is to develop predictive models for two core outcome parameters: 1)  
216 the patient-reported Oxford Shoulder Score (OSS) functional outcome, and 2) the occurrence  
217 of shoulder stiffness (primary safety event) as reported by patients and clinicians.

218  
219 *Secondary objectives* are 1) to evaluate the content and applicability of the defined  
220 consensus CES (i.e. ARCR CES 1.0)<sup>23</sup> in routine practice considering the patient's  
221 perspective, 2) to quantify the incidence of AE up to 24 months after surgery (e.g., persisting  
222 or worsening pain, recurrent rotator cuff (RC) defect), 3) to validate an adapted severity  
223 classification for postoperative local AEs<sup>12,37</sup>, and 4) to develop predictive models for other  
224 clinically-relevant outcome parameters including patient-reported outcomes (e.g., perception  
225 of improvement, return to work, return to sports, quality of life, satisfaction with surgery,  
226 acceptability of symptom state), clinical outcomes (e.g., shoulder strength and motion) and  
227 specific AEs (e.g. RC defect at 12 months).

## 229 **Methods and analysis**

### 230 *Study design and setting*

231 This is a prospective multicenter cohort study in patients undergoing ARCR with 17  
232 participating orthopedic centers in Switzerland and one German center.

233  
234 Several sub-projects, associated with the main ARCR cohort study, are planned and include  
235 a systematic review of prognostic studies in ARCR, the application of the ARCR CES 1.0 for  
236 AE documentation, and the application and validation of an AE severity classification



1  
2  
3 2374 238 *Eligibility criteria*

5  
6 239 Adult patients diagnosed with a partial or full-thickness RC tear by magnetic resonance  
7  
8 240 imaging (MRI), planned for a primary arthroscopic surgical repair, and giving their informed  
9  
10 241 consent to participate in the cohort study will be included. Patients undergoing a specific  
11  
12 242 surgical procedure for irreparable tears (i.e. tendon transfer, subacromial spacer or superior  
13  
14 243 capsular reconstruction), revision operations, open or mini-open reconstructions will be  
15  
16 244 excluded. Patients unable to give written informed consent or attend clinics for follow-up  
17  
18 245 visits, not fluent in German, French, Italian, or English or pregnant females will be excluded.  
19  
20 246 Patients undergoing bilateral ARCR will only be included for their first intervention.  
21  
22

23  
24 24725 248 *Intervention*

26  
27 249 Shoulder arthroscopies will be performed according to standardized clinic-specific and  
28  
29 250 international guidelines<sup>38</sup> in the context of routine care with patients in a beach-chair or  
30  
31 251 lateral decubitus position under general or local anesthesia. The variability in the repair  
32  
33 252 techniques used between clinics and surgeons will be documented. Typically, after the  
34  
35 253 diagnostic arthroscopy to assess the type of RC tear (partial or full-thickness tear and  
36  
37 254 involved tendons, tendon tear delamination, sign of tendon degeneration) and concomitant  
38  
39 255 injuries or lesions, the ruptured tendons are mobilized until they can be repositioned on the  
40  
41 256 original footprint with as little tension as possible. Tendon fixation may be performed using  
42  
43 257 one of multiple anchor and suture configurations according to the surgeon's decision. An  
44  
45 258 intervention at the biceps tendon is performed if any tendinopathy, or lesions to the superior  
46  
47 259 labrum or biceps pulley system are observed. An anterolateral or lateral acromioplasty is  
48  
49 260 performed at the surgeon's discretion, generally in the presence of a hooked-shaped  
50  
51 261 acromion or a critical shoulder angle larger than 35°, respectively. Operative details,  
52  
53 262 including additional concomitant procedures (acromioplasty, acromioclavicular joint  
54  
55 263 resection, capsulotomy, and biceps tenotomy or tenodesis) and operation duration are  
56  
57 264 recorded immediately after surgery. A standard 3-phase postoperative rehabilitation scheme  
58  
59  
60

1  
2  
3 265 is usually prescribed and will be documented in detail, including immobilization and passive  
4  
5 266 mobilization in the first phase, active mobilization and coordination training in the second  
6  
7 267 phase, followed by the third phase of specific progressive resistance exercises.  
8

9 268

### 10 11 269 *Outcomes*

12  
13 270 The *first primary outcome* is the patient-reported change in shoulder functional outcome  
14  
15 271 between baseline and 6 months postoperatively as measured with the Oxford Shoulder  
16  
17 272 Score (OSS).<sup>39</sup> The OSS is a condition-specific questionnaire developed for patients with a  
18  
19 273 degenerative or inflammatory state of the shoulder. It contains twelve items to be answered  
20  
21 274 by the patient independently, which deal with pain (degree, time point) and possible  
22  
23 275 handicaps in private and professional life. There are five categories of response for every  
24  
25 276 question, corresponding to a score ranging from 0 to 4. Scores are summed to give a single  
26  
27 277 score with a range from 0 (worst outcome) to 48 (best outcome). Transcultural validations of  
28  
29 278 this questionnaire for the German and Italian populations have been performed<sup>40 41</sup> and are  
30  
31 279 validated for patient-based outcomes after RC repair<sup>42-44</sup>. While functional outcome at the  
32  
33 280 last 24-month follow-up is clinically relevant, the early 6-month primary time point is chosen  
34  
35 281 because of the importance in early surgical recovery and rehabilitation, particularly when  
36  
37 282 considering the socioeconomic impact on professionally active patients<sup>4</sup>.  
38  
39

40 283

41  
42 284 The *second primary outcome* is the occurrence of shoulder stiffness within 6 months after  
43  
44 285 surgery: this event is poorly defined in the literature<sup>19</sup>. We formed a consensus definition of  
45  
46 286 shoulder stiffness among specialized shoulder surgeons in a Delphi survey, which describes  
47  
48 287 a postoperative restriction in passive shoulder motion diagnosed within 6 months after ARCR  
49  
50 288 in at least two of the motion planes of flexion, abduction and external rotation in 0° abduction.  
51  
52 289 Motion restriction is to be assessed separately for each plane according to specific threshold  
53  
54 290 criteria (flexion: total motion equal to or below 90° or glenohumeral motion equal to or below  
55  
56 291 80°; abduction: total motion equal to or below 80° or glenohumeral motion equal to or below  
57  
58 292 60°; external rotation in 0° abduction: glenohumeral motion equal to or below 20° or no more  
59  
60

1  
2  
3 293 than 50% of the contralateral side value). In this project, we will identify cases of shoulder  
4  
5 294 stiffness based on our consensus definition as well as clinical records and reports from  
6  
7 295 clinicians and their patients.  
8

9 296  
10  
11 297 Secondary outcomes will include: 1) local AEs according to the ARCR CES, in particular the  
12  
13 298 occurrence of recurrent defect of repaired tendon(s) at 12 months, when at least one  
14  
15 299 repaired tendon is diagnosed with a recurrent defect by ultrasound examination, persistent or  
16  
17 300 worsening pain, infection, any local event (composite outcome); 2) functional parameters of  
18  
19 301 the Constant score (CS)<sup>45</sup> at 6 and 12 months, shoulder strength (kg) in abduction at 6 and  
20  
21 302 12 months, patient-reported shoulder pain on the numeric rating scale (NRS) at 6, 12 and 24  
22  
23 303 months, patient-reported shoulder function: OSS at 6, 12 and 24 months, Subjective  
24  
25 304 Shoulder Value (SSV)<sup>46</sup> assessment at 6, 12 and 24 months; 3) general health and  
26  
27 305 socioeconomic parameters including patient-reported quality of sleep (NRS) at 6, 12 and 24  
28  
29 306 months<sup>47</sup>, return to work, change of working condition within 6, 12 and 24 months, level of  
30  
31 307 depression and anxiety at 6, 12 and 24 months based on Patient-Reported Outcomes  
32  
33 308 Measurement Information System (PROMIS) scores<sup>48 49</sup>, patient perceived shoulder  
34  
35 309 improvement, acceptability of own symptom state<sup>50</sup>, quality of life (utilities and general health)  
36  
37 310 at 6, 12 and 24 months using the European Quality of Life 5 Dimensions 5 Level  
38  
39 311 questionnaire (EQ-5D-5L), patient satisfaction with the surgical outcome at 12 and 24  
40  
41 312 months; 4) safety outcome assessment, occurrence of all AEs reported by clinicians and  
42  
43 313 patients (including non-local AEs within 6 months after surgery), final independent surgeon  
44  
45 314 and patient-rated assessment of AEs according to perceived severity (rating scale from 0 [no  
46  
47 315 complication] to 100 [death]<sup>51</sup>), comprehensive Complication Index<sup>51</sup> considering all AEs that  
48  
49 316 occurred within 6 months after surgery.  
50  
51  
52

53 317  
54  
55 318 Shoulder ultrasound examinations will be performed at 12 months by experienced clinicians  
56  
57 319 independent of the operating surgeons. The repair integrity will be graded according to the  
58  
59 320 Sugaya classification (where grade 4 or 5 defines the occurrence of a recurrent effect)<sup>52 53</sup>.  
60

1  
2  
3 321 Other ultrasound parameters include the location of the recurrent defect (at the footprint |  
4  
5 322 medial cuff failure), long biceps tendon status, signs of anchor displacement, and location  
6  
7 323 and signs of suture cut-through.  
8

9 324

10  
11 325 *Participant timeline*

12  
13 326 Local investigators will identify patients who meet the eligibility criteria. Patient enrollment  
14  
15 327 started on June 1<sup>st</sup>, 2020 and is planned for a maximum period of 15 months. Patients will  
16  
17 328 complete a preoperative evaluation no more than 2 months before surgery. Follow-up  
18  
19 329 assessments will be performed at 6 weeks (+/- 1 week), and 6 (+/- 1 month), 12 (+/- 1 month)  
20  
21 330 and 24 months (+/- 2 months) postoperatively. At the final 24-month time point, only patient  
22  
23 331 self-reporting assessments, including surveys on adverse events, will be documented (Figure  
24  
25 332 1). The end date for the study representing the collection of the last patient questionnaire is  
26  
27 333 expected on November 1<sup>st</sup>, 2023.  
28

29 334

30  
31 335 *Baseline prognostic factors*

32  
33 336 Various baseline parameters, operative details, and postoperative management variables are  
34  
35 337 known or suspected to influence ARCR outcomes <sup>32-36</sup>.  
36  
37 338

38 339

39  
40 339 The following patient-related factors will be recorded: patient demographics [year of birth for  
41  
42 340 age, sex], socioeconomic parameters [nationality, marital status, the highest level of  
43  
44 341 education, employment status, last occupational position, daily physical workload], dominant  
45  
46 342 side, smoking & drinking status, general physical and mental health [Body Mass Index (BMI)  
47  
48 343 and obesity, American Society of Anesthesiologists (ASA) classification, comorbidities (e.g.  
49  
50 344 diabetes), concomitant medication, level of depression and anxiety (PROMIS Depression  
51  
52 345 and Anxiety Short Form 4a) <sup>48 49</sup>, quality of life (EQ-5D-5L) <sup>54</sup>].  
53

54 346

55  
56 347 Disease-related factors are shoulder clinical examinations [pain level on a numeric rating  
57  
58 348 scale (NRS), range of motion, muscle strength, Constant Score <sup>45</sup>], patient-reported shoulder  
59  
60

1  
2  
3 349 function (see outcome measures), radiograph parameters [Critical Shoulder Angle <sup>55</sup>,  
4  
5 350 acromiohumeral distance <sup>56</sup>], MRI or arthro-Computer Tomography (CT) parameters  
6  
7 351 [supraspinatus muscle atrophy <sup>57</sup>, tangent sign <sup>58</sup>, grade of fatty infiltration <sup>59 60</sup>], medical  
8  
9 352 history [cause of injury (trauma event), symptom duration, previous interventions (operation  
10  
11 353 and timing of surgery), actual medication, and the extent of physical therapy].  
12

13 354

15 355 Rotator cuff integrity and concomitant local findings. The RC tear will be determined by MRI  
16  
17 356 (or arthro-CT) and confirmed intraoperatively: tear size: location (involved tendons) and  
18  
19 357 grading (partial / complete), tendon retraction grade <sup>61</sup> and tear sagittal size <sup>62</sup> , status of the  
20  
21 358 biceps tendon, additional intraoperative observation of concomitant local injuries [Superior  
22  
23 359 Labrum from Anterior to Posterior (SLAP) lesion, Humeral Avulsion Glenohumeral Ligament  
24  
25 360 (HAGL), Bankart lesion, humeral and glenoid-side chondral lesions].  
26  
27

28 361

30 362 Operative details and postoperative management: type of ARCR procedure [use of anchors,  
31  
32 363 suture techniques], augmentation techniques [e.g. platelet concentrates, scaffolds, ...] <sup>63</sup>,  
33  
34 364 additional concomitant treatment [acromioplasty, acromioclavicular joint resection,  
35  
36 365 capsulotomy, biceps tenotomy or tenodesis, treatment of SLAP lesion], operation duration,  
37  
38 366 duration of hospital stay, postoperative management [immobilization position and duration,  
39  
40 367 pain medication [e.g. using non-steroidal anti-inflammatory drugs], timing of passive and  
41  
42 368 active shoulder motion, physiotherapy and muscle training].  
43  
44

45 369

#### 47 370 *Adverse event documentation and assessment process*

48  
49 371 Operating surgeons will report the occurrence of any intraoperative AE on the operation  
50  
51 372 form. The occurrence of postoperative local AEs within 24 months will be reported by  
52  
53 373 investigators at the clinical examination and by patients on the questionnaires. The  
54  
55 374 occurrence of postoperative non-local AEs that are unrelated to the operation will be  
56  
57 375 documented in a similar manner, however only within 6 months after surgery. An AE form  
58  
59 376 was developed according to the ARCR CES 1.0 <sup>23</sup>. Each AE documentation will be structured  
60

1  
2  
3 377 after Audigé et al.<sup>64</sup> and includes the date/period of occurrence [intra- / postoperative], the  
4  
5 378 affected body location [local at the operated shoulder / non-local], the event group and  
6  
7 379 specification, applied health-related intervention(s) [operative / nonoperative procedure(s)],  
8  
9 380 its outcome at the time of reporting (or end of the study), and the assessment of the event  
10  
11 381 [causal factor(s) / severity grade / seriousness]. Severity grading will be made according to  
12  
13 382 existing and adapted systems for intraoperative<sup>65 66</sup> and postoperative<sup>12 37</sup> complications.  
14  
15 383 The documentation of AEs will be checked for completeness and consistency remotely as  
16  
17 384 well as on-site by reviewing selected patient files as part of the monitoring plan. A review  
18  
19 385 committee (LA, AM, TS, HD and DS) will assess all events reported by surgeons and  
20  
21 386 patients, and generate queries to the respective sites as required.  
22

23  
24 387  
25  
26 388 Fully documented local events, including their treatment, outcome and possible causative  
27  
28 389 factors, will be formulated in layman's terms and sent back to the affected patients, so that  
29  
30 390 they can confirm and validate collected AE data as well as assess their severity on a visual  
31  
32 391 analogue scale from 0 (not at all severe) to 100 (extremely severe). This subsequent rating  
33  
34 392 will also be performed by their treating surgeon and four other randomly-selected surgeons  
35  
36 393 involved in the project, blinded from the original severity grading.  
37

38  
39 394

#### 40 395 *Sample size determination*

41  
42 396 For sample size calculation, we set up a simulation study and used multiple regression to  
43  
44 397 predict the change in OSS within 6 months for the most important prognostic factors. The  
45  
46 398 prognostic factors were derived from an existing ARCR local registry<sup>67</sup> and include age, sex,  
47  
48 399 body mass index/obesity status, tendon quality/degeneration, and RC severity<sup>32-36</sup>. We  
49  
50 400 accounted for the type I error at 5% for statistical significance and the type II error set at 20%  
51  
52 401 for 80% statistical power<sup>68</sup>. Two thousand replications were done, and the p-values were  
53  
54 402 recorded to calculate the mean significance for each of the prognostic factors to reach a  
55  
56 403 minimum of 80% statistical power. This approach led to a sample of 920 patients.  
57  
58 404

59  
60

1  
2  
3 405 For the second primary outcome of shoulder stiffness, we accounted for a minimum of ten  
4  
5 406 events per variable to allow for the inclusion of a maximum of ten predictors into the model<sup>69</sup>  
6  
7 407 <sup>70</sup>. The estimated event rate for shoulder stiffness from our pilot data set was 8.3%, which,  
8  
9 408 according to our experience, might reflect an underestimation of the true rate<sup>17</sup>. Therefore, a  
10  
11 409 10% stiffness rate was assumed, which resulted in a sample size calculation of 900 patients.  
12  
13 410 The higher resulting number determines the final number of patients to be recruited.  
14  
15 411 Therefore, 920 patients will be included with an additional 50 patients (i.e. 970 patients) due  
16  
17 412 to the anticipated maximum dropout rate of 5% at 6 months (based on personal experience).  
18  
19 413

20 413

#### 21 414 *Recruitment*

22  
23 415 Study sites and local investigators were selected based on their expertise in ARCR with  
24  
25 416 support by the shoulder and elbow expert group of Swiss Orthopaedics. Each site was  
26  
27 417 visited by the project leaders to assess the adequacy of local clinical and research settings  
28  
29 418 for the project as well as to ensure prior interest and commitment. The number of included  
30  
31 419 sites was determined based on the reported estimate of the number of ARCR patients that  
32  
33 420 could be realistically enrolled within one year from each site, and included an allowance for  
34  
35 421 overestimation (i.e. all sites together estimated that they could recruit up to 40% more than  
36  
37 422 the expected 970 patients within one year).

38  
39 423 Patients who are enrolled after signing an informed consent form are definitively recruited for  
40  
41 424 the project after documentation of baseline parameters (clinical examinations and patient  
42  
43 425 questionnaires) and confirmation of ARCR during surgery. A recruitment curve is prepared  
44  
45 426 every 2 weeks and sent to the project sites along with a recruitment table presenting the  
46  
47 427 performance of each site. Sites that are unable to recruit the expected number of patients  
48  
49 428 within the first 3 months will be considered for exclusion from the project and replaced by  
50  
51 429 additional sites if the estimated total duration of patient enrollment is delayed for more than 3  
52  
53 430 months.

54 430

#### 55 431 56 432 *Data collection methods*

57 431

58 431

59 432

60 432



1  
2  
3 433 Data are collected on electronic or paper-based case report forms or patient questionnaires.  
4  
5 434 Project parameters and used instruments are presented in previous sections of this protocol.  
6  
7 435 A training video was prepared for the collection of CS data <sup>45</sup>. For the measurement of  
8  
9 436 shoulder muscle strength, several devices were permitted, i.e. IsoForceControl® (MDS  
10  
11 437 Medical Device Solution, Oberburg, Switzerland), Mark-10 Force Gauge (Mark-10  
12  
13 438 Corporation, Copiague, USA) as well as hand-held (Lafayette Instrument Co., Lafayette,  
14  
15 439 USA) or MicroFET 2 (Hoggan Scientific, Salt Lake City, USA) dynamometers; the use of a  
16  
17 440 spring balance was not allowed.

18  
19 441  
20  
21 442 Patient clinical examinations, including baseline imaging assessments, are performed at  
22  
23 443 each site by experienced clinicians (who may be assisted by locally-trained research staff)  
24  
25 444 and documented primarily on paper-based case report forms. Baseline MRI and radiographs  
26  
27 445 are coded and centralized at the University of Basel to ensure data quality control. Operative  
28  
29 446 data are collected electronically by the respective surgeons shortly after surgery. Patients  
30  
31 447 complete questionnaires in their preferred language, which is limited to German, French,  
32  
33 448 Italian or English, either electronically after invitation, by email or on a tablet computer at the  
34  
35 449 site, or otherwise on paper. AEs are documented electronically by the respective surgeons  
36  
37 450 with support from their research staff. Data collected on paper forms are entered  
38  
39 451 electronically at each site or at a central location at the University of Basel based on the  
40  
41 452 agreement made with each site.  
42  
43  
44  
45

46

#### 47 454 *Data monitoring*

48  
49 455 A central project data manager will perform data quality control on all collected data. A  
50  
51 456 flowchart will be created to describe the number of consecutively recruited patients who had  
52  
53 457 an RCR by arthroscopic procedure or had a conversion to an open procedure, and who  
54  
55 458 completed follow-up clinical and imaging examinations as well as self-reported outcome  
56  
57 459 questionnaires. The reasons for patient dropout and loss to follow-up status will be monitored  
58  
59 460 and described. All recorded study parameters will be described using standard descriptive  
60

1  
2  
3 461 statistics; continuous variables will be presented as means with standard deviations and  
4  
5 462 categorical variables as counts with percentages. The variability of data between clinics will  
6  
7 463 be explored to support the identification of outlier data.

8  
9 464 Weekly site-specific reports, including the patient enrollment list, expected follow-up timing  
10  
11 465 and identification of missing, erroneous or inconsistent data, are sent to the respective local  
12  
13 466 project staff. Data-related queries will be resolved remotely or by on-site monitoring visits  
14  
15 467 before the final analyses are performed.

16  
17 468 There is no plan for auditing project conduct other than via reporting at the annual meetings  
18  
19 469 of the project scientific board.

20  
21  
22 470

#### 23 471 *Data management*

24  
25 472 Study data will be stored using the REDCap web-based electronic data capture system<sup>71 72</sup>  
26  
27  
28 473 on a server that is hosted at Schulthess Klinik. REDCap conforms with Good Clinical  
29  
30 474 Practice guidelines that provide required features for data protection and integrity, e.g.,  
31  
32 475 password-protected access and change tracking.

33  
34 476

35  
36 477 Study data will be coded and exported from the REDCap system into Stata software  
37  
38 478 (StataCorp LP, College Station, USA) for statistical analyses. Data transformations and  
39  
40 479 analyses will be primarily implemented using Stata and fully documented within Stata  
41  
42 480 programming files. Data subsets will be prepared for analyses using alternative software  
43  
44 481 (e.g. R for prediction models) as appropriate.

45  
46  
47 482

48  
49 483 All patients with an intraoperatively confirmed RC tear and operated by ARCR will be  
50  
51 484 included in the analyses. Existing missing data will be imputed if the number of missing data  
52  
53 485 is non-negligible or could potentially bias the results and conclusions.

54  
55 486

#### 56 57 487 *Systematic review of prognostic factors*

1  
2  
3 488 A systematic review of prognostic factors for ARCR outcomes is implemented (PROSPERO  
4  
5 489 registration ID: CRD42020199257). Briefly, literature from 2014 to 2020 will be checked to  
6  
7 490 identify longitudinal studies including patients diagnosed with a RC tear. These studies  
8  
9 491 should report the effect of at least one factor on one of the following outcomes: shoulder  
10  
11 492 stiffness, RC tear repair integrity, and shoulder function. Data extraction will follow a pre-  
12  
13 493 defined template and the collected data will be stored within a separate database using  
14  
15 494 REDCap. Data from different studies will be described and may be synthesized depending  
16  
17 495 on the data type and heterogeneity. These data will be used to generate a list of factors most  
18  
19 496 likely to influence our project outcomes and therefore, should be considered for inclusion in  
20  
21 497 the predictive model development process.  
22

23 498

#### 25 499 *Predictive model development*

27  
28 500 To develop the predictive model(s), the seven steps proposed by Steyerberg et al.<sup>73 74</sup> will be  
29  
30 501 used. The steps comprise: 1) consideration of the research question and initial data  
31  
32 502 inspection, 2) coding of the predictors, 3) model specification, 4) model estimation, 5)  
33  
34 503 evaluation of model performance, 6) internal validation, and 7) model presentation.  
35  
36 504 Depending on the type of outcome, different models will be fitted and evaluated, i.e. multiple  
37  
38 505 regression models for the change in OSS at 6 months and multivariable logistic regression  
39  
40 506 models for shoulder stiffness. Model diagnostics will be performed for all models to check the  
41  
42 507 underlying assumptions.  
43

44 508

46  
47 509 The prediction of the model(s) will be based on the baseline, operative, and postoperative  
48  
49 510 management variables. Firstly, a subset of the potential prognostic factors will be defined  
50  
51 511 based on whether it is thought to be most predictive. The subset will be selected separately  
52  
53 512 for each outcome by the Delphi method among the investigators, whereby the factors will be  
54  
55 513 noted for their known or potential prognostic value on a 5-point Likert scale from 1 (not  
56  
57 514 important) to 5 (extremely important). These factors, with the highest mean score among  
58  
59 515 investigators, will form the subset.  
60

1  
2  
3 516  
4  
5 517 We will then use criterion-based procedures (e.g. Akaike Information Criterion [AIC] or  
6  
7 518 adjusted  $R^2$ ) to select the best set of predictors for the continuous outcome(s) and for the  
8  
9 519 binary outcome, we will use the area under receiving operating characteristics curve (AUC).  
10  
11 520 To assess the predictive performance of the final models as well as the updated version of  
12  
13 521 the prediction models, the calibration plot and discrimination measures will be used. Thereby,  
14  
15 522 apparent performance will be evaluated on the respective development data, and internal  
16  
17 523 validated performance will be determined by bootstrapping. Independent external validation  
18  
19 524 will be estimated by applying the resulting models from the development data set in the  
20  
21 525 respective validation data sets. The resulting models will be used to predict the change of  
22  
23 526 outcome value (i.e. OSS in 6 months) and assess whether a patient will experience the event  
24  
25 527 (i.e. shoulder stiffness).  
26  
27  
28 528

29  
30 529 If we observe missing data, then missing data imputation will be performed using a method  
31  
32 530 that allows for uncertainty in the imputed values (e.g. multiple imputations using chained  
33  
34 531 equation <sup>75</sup>). We will account for the clustering of records within clinics as appropriate.  
35

36 532

### 37 38 533 *Adverse events*

39  
40 534 Occurring AEs other than those listed in the CES as well as events occurring outside the  
41  
42 535 periods defined by the core set will be analyzed separately for consideration of clinical  
43  
44 536 relevance. This analysis will be made by the review committee and project scientific board  
45  
46 537 (PSB) comprising all local project leaders (principal investigators). Recommendations for  
47  
48 538 change of the ARCR CES 1.0 by the PSB will be formulated.  
49

50  
51 539

52  
53 540 The incidence of AEs, specific individual events and groups of events defined within the  
54  
55 541 ARCR CES 1.0 up to 24 months postoperatively will be displayed as the frequency of  
56  
57 542 patients with an event relative to the number of patients observed, reported together with its  
58  
59 543 95% Wilson confidence interval. These results will be presented in a summary table together  
60

1  
2  
3 544 with the absolute frequency. Further details on the period of occurrence will be given by  
4  
5 545 stratifying for the time point of event occurrence. We will also stratify AEs according to their  
6  
7 546 severity level and patient relevance. Validation of the postoperative local AE severity  
8  
9 547 classification system will be implemented using previously used methods <sup>76 77</sup>.

10  
11 548

### 12 13 549 *Patient and public involvement*

14  
15 550 No patient or member of the public was involved in the design of this cohort study protocol.

16  
17 551 Enrolled patients will contribute to the evaluation and validation of documented AEs and their  
18  
19 552 severity grading, therefore to a potential revision of the ARCR CES. We are planning to  
20  
21 553 present initial results to patients and the public, and get feedback for further analyses and  
22  
23 554 future model development as well as documentation system in ARCR.

24  
25 555

### 26 27 28 556 **Ethics and dissemination**

#### 29 30 557 *Research ethics approval*

31  
32 558 Ethical approval was obtained on April 1<sup>st</sup> 2020 from the lead ethics committee (EKNZ, Basel  
33  
34 559 Switzerland; ID: 2019-02076).

35  
36 560

#### 37 38 561 *Protocol amendments*

39  
40 562 Minor protocol amendments, e.g. database production changes to facilitate monitoring  
41  
42 563 processes or improve outcome assessment by questionnaire, are fully documented. Major  
43  
44 564 amendments, e.g. changes to the patient information sheet and consent form, change of a  
45  
46 565 local project leader or the inclusion of a new project site, will be submitted for approval by the  
47  
48 566 lead ethics committee as required.

49  
50 567

#### 51 52 568 *Consent or assent*

53  
54 569 All participants will provide informed written consent prior to being enrolled into the study.

55  
56 570 The English version of the informed consent form used at the University Hospital of Basel is  
57  
58 571 available as Supplement file 1.

1  
2  
3 5724 573 *Confidentiality*

574 Project data will be handled with utmost discretion and can only be accessed by authorized  
575 personnel as outlined by a study delegation list created for each project site. Patient data will  
576 be coded, i.e. identified by a unique participant number. A participant identification list will be  
577 managed and kept in a place (an electronic folder or paper-based form) only accessible to  
578 authorized staff at each site.

579 The project leader affirms and upholds the principle of each patient's right to privacy and that  
580 they shall comply with applicable privacy laws. In particular, anonymity of all patients shall be  
581 guaranteed when presenting the data at scientific meetings or publishing them in scientific  
582 journals.

25 583

27 584 *Declaration of interests*

29 585 None declared.

31 586

33 587 *Access to data*

34 588 Project data will be shared at the end of the analysis process by the PSB. The Department of  
35 589 Clinical Research (German Departement Klinische Forschung, DKF) at the University  
36 590 Hospital of Basel will act as an independent data access committee, and will store the data  
37 591 at the time of publication on secure servers, maintained and backed-up by the Information  
38 592 and Communication Technology department at the University Hospital of Basel. Researchers  
39 593 who wish to reuse data will be able to submit a project synopsis to the DKF at  
40 594 [dkf.unibas.ch/contact](https://dkf.unibas.ch/contact). A data-sharing statement referring researchers to the DKF for data  
41 595 access will be disseminated in the publications. Metadata describing the type, size and  
42 596 content of the data sets will be shared along with the study protocol on the Harvard  
43 597 Dataverse repository available online (<https://dataverse.harvard.edu/>). Additionally, the case  
44 598 report forms will be uploaded on a medical data models portal (<https://medical-data->

1  
2  
3 599 models.org/) and all variables will be annotated by their Unified Medical Language System  
4  
5 600 Concept Unique Identifier to improve accessibility to other clinicians.

6  
7 601

8  
9 602 *Dissemination policy*

10  
11 603 This project will lead to multiple open-access, peer-reviewed scientific publications, which will  
12  
13 604 be prepared according to international standards (e.g. the STROBE statement<sup>78</sup> for cohort  
14  
15 605 studies; TRIPOD<sup>79</sup> statements for prognostic studies; PRISMA<sup>80</sup> statement for systematic  
16  
17 606 reviews). Publication authorship will regulated according to the guidelines of the Swiss  
18  
19 607 Academies of Arts and Sciences<sup>81</sup>. Results will be submitted for presentation at national and  
20  
21 608 international conferences. In addition, lay summary results will be developed and made  
22  
23 609 available for patients and the public.

24  
25 610

26  
27 611 *Scientific relevance and broader impact*

28  
29 612 This project initiates the development of personalized risk predictions to support the surgical  
30  
31 613 decision process in ARCR. The consensus CES may become an international reference for  
32  
33 614 the reporting of complications in clinical studies and registries, and may therefore provide a  
34  
35 615 solid metric for the documentation of surgical safety in ARCR. Methodological insight gained  
36  
37 616 from this project will be easily transferable to similar initiatives and thus, may foster the  
38  
39 617 realization of other cohorts on safety and effectiveness outcome in shoulder surgery (e.g.  
40  
41 618 arthroplasty) and orthopedics in general.

42  
43  
44 619

45  
46 620 For patients affected by RC tears and their surgeons, this study will be the first to provide  
47  
48 621 solid data on the incidence of patient-validated AEs and other core outcomes up to two years  
49  
50 622 after surgical repair based on international consensus COS and CES. This study will allow  
51  
52 623 the investigation of a comprehensive list of potential prognostic factors to generate predictive  
53  
54 624 models for these core outcomes and hence, offer personalized health information to support  
55  
56 625 future patients and surgeons in the decision process for surgery. Outcome predictors and  
57  
58 626 risk calculators are increasingly being developed in numerous medical fields including  
59  
60 627 surgery and orthopedics, and they are in development in the field of ARCR.



1  
2  
3 628  
4  
5 629 This study will assess the structure and content of the ARCR CES and consolidate its validity  
6  
7 630 in capturing unfavorable events of importance to both patients and surgeons; considering the  
8  
9 631 patient's perspective is an essential step in the development of a COS. Furthermore, the  
10  
11 632 validation of an adapted severity classification of AEs in this study will provide an essential  
12  
13 633 system for assessing surgical morbidity in orthopedics. We expect that the ARCR CES and  
14  
15 634 the event severity classification will become international standards for the reporting of  
16  
17 635 ARCR AEs in clinical studies and registries, and therefore provide a solid metric for the  
18  
19 636 documentation of surgical safety in ARCR.  
20

21 637  
22  
23 638 This study fosters the enterprise in developing a Swiss-wide registry of ARCR, which will  
24  
25 639 allow the ongoing evaluation and prediction of targeted core safety, clinical and patient-  
26  
27 640 reported outcomes. The identification of factors mostly associated with relevant outcomes  
28  
29 641 will facilitate a lean and straightforward documentation process for ARCR patients in  
30  
31 642 Switzerland and abroad.  
32  
33

34 643

#### 36 644 **Acknowledgments**

37  
38 645 The authors acknowledge the support of Dr. Martina Gosteli, medical librarian at the  
39  
40 646 University of Zurich, for implementing the preliminary literature database search to support  
41  
42 647 this protocol development. The authors would also like to acknowledge the support of  
43  
44 648 Dr. Melissa Wilhelmi, medical writer at Schulthess Klinik, Zurich, Switzerland, for manuscript  
45  
46 649 proofreading.  
47  
48

49 650  
50  
51  
52  
53  
54  
55  
56  
57  
58  
59  
60

651 **References**

- 652 1. Schmidt CC, Morrey BF. Management of full-thickness rotator cuff tears: appropriate use  
653 criteria. *J Shoulder Elbow Surg* 2015;24(12):1860-7. doi: 10.1016/j.jse.2015.05.042
- 654 2. Carr AJ, Cooper CD, Campbell MK, et al. Clinical effectiveness and cost-effectiveness of  
655 open and arthroscopic rotator cuff repair [the UK Rotator Cuff Surgery (UKUFF)  
656 randomised trial]. *Health Technol Assess* 2015;19(80):1-218. doi: 10.3310/hta19800  
657 [published Online First: 2015/10/16]
- 658 3. Moosmayer S, Lund G, Seljom US, et al. At a 10-Year Follow-up, Tendon Repair Is  
659 Superior to Physiotherapy in the Treatment of Small and Medium-Sized Rotator Cuff  
660 Tears. *J Bone Joint Surg Am* 2019;101(12):1050-60. doi: 10.2106/JBJS.18.01373  
661 [published Online First: 2019/06/21]
- 662 4. Grobet C, Audige L, Eichler K, et al. Cost-Utility Analysis of Arthroscopic Rotator Cuff  
663 Repair: A Prospective Health Economic Study Using Real-World Data. *Arthrosc  
664 Sports Med Rehabil* 2020;2(3):e193-e205. doi: 10.1016/j.asmr.2020.02.001  
665 [published Online First: 2020/06/18]
- 666 5. Piper CC, Hughes AJ, Ma Y, et al. Operative versus nonoperative treatment for the  
667 management of full-thickness rotator cuff tears: a systematic review and meta-  
668 analysis. *J Shoulder Elbow Surg* 2018;27(3):572-76. doi: 10.1016/j.jse.2017.09.032  
669 [published Online First: 2017/11/25]
- 670 6. Ensor KL, Kwon YW, Dibeneditto MR, et al. The rising incidence of rotator cuff repairs. *J  
671 Shoulder Elbow Surg* 2013;22(12):1628-32. doi: 10.1016/j.jse.2013.01.006
- 672 7. Iyengar JJ, Samagh SP, Schairer W, et al. Current trends in rotator cuff repair: surgical  
673 technique, setting, and cost. *Arthroscopy* 2014;30(3):284-8. doi:  
674 10.1016/j.arthro.2013.11.018
- 675 8. Colvin AC, Egorova N, Harrison AK, et al. National trends in rotator cuff repair. *J Bone  
676 Joint Surg Am* 2012;94(3):227-33. doi: 10.2106/JBJS.J.00739
- 677 9. Jung C, Buchmann S, Flury M. Die arthroskopische Rotatorenmanschetten-  
678 Rekonstruktion - Von der Ausnahme zum Standard. *Swiss Journal of Medicine and  
679 Medical Technology (Swiss Med)*, 2012:35-39.
- 680 10. Keener JD, Patterson BM, Orvets N, et al. Degenerative Rotator Cuff Tears: Refining  
681 Surgical Indications Based on Natural History Data. *J Am Acad Orthop Surg*  
682 2019;27(5):156-65. doi: 10.5435/JAAOS-D-17-00480 [published Online First:  
683 2018/10/20]
- 684 11. Randelli P, Spennacchio P, Ragone V, et al. Complications associated with arthroscopic  
685 rotator cuff repair: a literature review. *Musculoskelet Surg* 2012;96(1):9-16. doi:  
686 10.1007/s12306-011-0175-y

- 1  
2  
3 687 12. Felsch Q, Mai V, Durchholz H, et al. Complications within 6 months after arthroscopic  
4 688 rotator cuff repair: registry-based evaluation according to a core event set and  
5 689 severity grading. *Arthroscopy* 2020;in Press. doi: 10.1016/j.arthro.2020.08.010  
6  
7 690 [published Online First: 2020/08/25]  
8  
9 691 13. Muller AM, Flury M, Alsayed HN, et al. Influence of patient and diagnostic parameters on  
10 692 reported retear rates after arthroscopic rotator cuff repair. *Knee Surg Sports*  
11 693 *Traumatol Arthrosc* 2017 doi: 10.1007/s00167-017-4481-2  
12  
13 694 14. Yoo JH, Cho NS, Rhee YG. Effect of postoperative repair integrity on health-related  
14 695 quality of life after rotator cuff repair: healed versus retear group. *Am J Sports Med*  
15 696 2013;41(11):2637-44. doi: 10.1177/0363546513499152 [published Online First:  
16 697 2013/08/15]  
17  
18 698 15. Robinson HA, Lam PH, Walton JR, et al. The effect of rotator cuff repair on early  
19 699 overhead shoulder function: a study in 1600 consecutive rotator cuff repairs. *Journal*  
20 700 *of Shoulder & Elbow Surgery* 2017;26(1):20-29. doi: 10.1016/j.jse.2016.05.022  
21  
22 701 16. Huberty DP, Schoolfield JD, Brady PC, et al. Incidence and treatment of postoperative  
23 702 stiffness following arthroscopic rotator cuff repair. *Arthroscopy : the journal of*  
24 703 *arthroscopic & related surgery : official publication of the Arthroscopy Association of*  
25 704 *North America and the International Arthroscopy Association* 2009;25(8):880-90. doi:  
26 705 10.1016/j.arthro.2009.01.018 [published Online First: 2009/08/12]  
27  
28 706 17. Denard PJ, Ladermann A, Burkhart SS. Prevention and management of stiffness after  
29 707 arthroscopic rotator cuff repair: systematic review and implications for rotator cuff  
30 708 healing. *Arthroscopy* 2011;27(6):842-8. doi: 10.1016/j.arthro.2011.01.013  
31  
32 709 18. Itoi E, Arce G, Bain GI, et al. Shoulder Stiffness: Current Concepts and Concerns.  
33 710 *Arthroscopy : the journal of arthroscopic & related surgery : official publication of the*  
34 711 *Arthroscopy Association of North America and the International Arthroscopy*  
35 712 *Association* 2016;32(7):1402-14. doi: 10.1016/j.arthro.2016.03.024 [published Online  
36 713 First: 2016/05/18]  
37  
38 714 19. Audige L, Blum R, Muller AM, et al. Complications Following Arthroscopic Rotator Cuff  
39 715 Tear Repair: A Systematic Review of Terms and Definitions With Focus on Shoulder  
40 716 Stiffness. *Orthopaedic Journal of Sports Medicine* 2015;3(6) doi:  
41 717 10.1177/2325967115587861  
42  
43 718 20. Gargon E, Gurung B, Medley N, et al. Choosing important health outcomes for  
44 719 comparative effectiveness research: a systematic review. *PLoS One*  
45 720 2014;9(6):e99111. doi: 10.1371/journal.pone.0099111  
46  
47 721 21. Buchbinder R, Page MJ, Huang H, et al. A Preliminary Core Domain Set for Clinical  
48 722 Trials of Shoulder Disorders: A Report from the OMERACT 2016 Shoulder Core  
49 723 Outcome Set Special Interest Group. *J Rheumatol* 2017;44(12):1880-83. doi:  
50 724 10.3899/jrheum.161123 [published Online First: 2017/01/17]

- 1  
2  
3 725 22. Page MJ, Huang H, Verhagen AP, et al. Identifying a core set of outcome domains to  
4 726 measure in clinical trials for shoulder disorders: a modified Delphi study. *RMD Open*  
5 727 2016;2(2):e000380. doi: 10.1136/rmdopen-2016-000380 [published Online First:  
6 728 2017/01/27]
- 7  
8  
9 729 23. Audige L, Flury M, Muller AM, et al. Complications associated with arthroscopic rotator  
10 730 cuff tear repair: definition of a core event set by Delphi consensus process. *J*  
11 731 *Shoulder Elbow Surg* 2016;25(12):1907-17. doi: 10.1016/j.jse.2016.04.036
- 12  
13  
14 732 24. Felsch Q, Mai V, Durchholz H, et al. Complications within 6 months after arthroscopic  
15 733 rotator cuff repair: registry-based evaluation according to a core event set and  
16 734 severity grading. *Arthroscopy : the journal of arthroscopic & related surgery : official*  
17 735 *publication of the Arthroscopy Association of North America and the International*  
18 736 *Arthroscopy Association* 2020 doi: 10.1016/j.arthro.2020.08.010 [published Online  
19 737 First: 2020/08/25]
- 20  
21  
22  
23 738 25. Steyerberg EW, Moons KG, van der Windt DA, et al. Prognosis Research Strategy  
24 739 (PROGRESS) 3: prognostic model research. *PLoS Med* 2013;10(2):e1001381. doi:  
25 740 10.1371/journal.pmed.1001381 [published Online First: 2013/02/09]
- 26  
27  
28 741 26. Sepucha KR, Atlas SJ, Chang Y, et al. Informed, Patient-Centered Decisions Associated  
29 742 with Better Health Outcomes in Orthopedics: Prospective Cohort Study. *Med Decis*  
30 743 *Making* 2018;38(8):1018-26. doi: 10.1177/0272989X18801308 [published Online  
31 744 First: 2018/11/08]
- 32  
33  
34 745 27. Guo W, Jin J, Paynabar K, et al. A decision support system on surgical treatments for  
35 746 rotator cuff tears. *IIE Transactions on Healthcare Systems Engineering*  
36 747 2015;5(3):197-210. doi: 10.1080/19488300.2015.1065935
- 37  
38  
39 748 28. Kwon J, Kim SH, Lee YH, et al. The Rotator Cuff Healing Index: A New Scoring System  
40 749 to Predict Rotator Cuff Healing After Surgical Repair. *Am J Sports Med*  
41 750 2019;47(1):173-80. doi: 10.1177/0363546518810763 [published Online First:  
42 751 2018/11/30]
- 43  
44  
45 752 29. Jeong HY, Kim HJ, Jeon YS, et al. Factors predictive of healing in large rotator cuff tears:  
46 753 Is it possible to predict retear preoperatively? *The American journal of sports*  
47 754 *medicine* 2018;46(7):1693-700.
- 48  
49  
50 755 30. Frangiamore S, Dornan GJ, Horan MP, et al. Predictive Modeling to Determine  
51 756 Functional Outcomes After Arthroscopic Rotator Cuff Repair. *Am J Sports Med*  
52 757 2020;48(7):1559-67. doi: 10.1177/0363546520914632 [published Online First:  
53 758 2020/05/15]
- 54  
55  
56 759 31. Koorevaar RC, van't Riet E, Ipskamp M, et al. Incidence and prognostic factors for  
57 760 postoperative frozen shoulder after shoulder surgery: a prospective cohort study.  
58 761 *Archives of orthopaedic and trauma surgery* 2017;137(3):293-301.

- 1  
2  
3 762 32. Fermont AJ, Wolterbeek N, Wessel RN, et al. Prognostic factors for recovery after  
4 763 arthroscopic rotator cuff repair: a prognostic study. *J Shoulder Elbow Surg*  
5 764 2015;24(8):1249-56. doi: 10.1016/j.jse.2015.04.013
- 7 765 33. Lambers Heerspink FO, Dorrestijn O, van Raay JJ, et al. Specific patient-related  
8 766 prognostic factors for rotator cuff repair: a systematic review. *J Shoulder Elbow Surg*  
9 767 2014;23(7):1073-80. doi: 10.1016/j.jse.2014.01.001
- 12 768 34. McElvany MD, McGoldrick E, Gee AO, et al. Rotator cuff repair: published evidence on  
13 769 factors associated with repair integrity and clinical outcome. *American Journal of*  
14 770 *Sports Medicine* 2015;43(2):491-500. doi: [10.1177/0363546514529644](https://doi.org/10.1177/0363546514529644)
- 17 771 35. Saccomanno MF, Sircana G, Cazzato G, et al. Prognostic factors influencing the  
18 772 outcome of rotator cuff repair: a systematic review. *Knee Surgery, Sports*  
19 773 *Traumatology, Arthroscopy* 2016;24(12):3809-19.
- 21 774 36. Raman J, Walton D, MacDermid JC, et al. Predictors of outcomes after rotator cuff  
22 775 repair-A meta-analysis. *J Hand Ther* 2017;30(3):276-92. doi:  
23 776 10.1016/j.jht.2016.11.002
- 26 777 37. Dindo D, Demartines N, Clavien PA. Classification of surgical complications: a new  
27 778 proposal with evaluation in a cohort of 6336 patients and results of a survey. *Ann*  
28 779 *Surg* 2004;240(2):205-13. [published Online First: 2004/07/27]
- 31 780 38. Lafosse L, Jost B, Reiland Y, et al. Structural integrity and clinical outcomes after  
32 781 arthroscopic repair of isolated subscapularis tears. *J Bone Joint Surg Am*  
33 782 2007;89(6):1184-93. doi: 10.2106/JBJS.F.00007
- 35 783 39. Dawson J, Rogers K, Fitzpatrick R, et al. The Oxford shoulder score revisited. *Arch*  
36 784 *Orthop Trauma Surg* 2009;129(1):119-23.
- 39 785 40. Huber W, Hofstaetter JG, Hanslik-Schnabel B, et al. The German version of the Oxford  
40 786 Shoulder Score--cross-cultural adaptation and validation. *Arch Orthop Trauma Surg*  
41 787 2004;124(8):531-6.
- 43 788 41. Murena L, Vulcano E, D'Angelo F, et al. Italian cross-cultural adaptation and validation of  
44 789 the Oxford Shoulder Score. *J Shoulder Elbow Surg* 2010;19(3):335-41. doi:  
45 790 10.1016/j.jse.2009.07.068 [published Online First: 2009/11/10]
- 48 791 42. Olley LM, Carr AJ. The use of a patient-based questionnaire (the Oxford Shoulder Score)  
49 792 to assess outcome after rotator cuff repair. *Ann R Coll Surg Engl* 2008;90(4):326-31.  
50 793 doi: 10.1308/003588408X285964 [published Online First: 2008/05/22]
- 53 794 43. Xu S, Chen JY, Lie HME, et al. Minimal Clinically Important Difference of Oxford,  
54 795 Constant, and UCLA shoulder score for arthroscopic rotator cuff repair. *J* 2020;19:21-  
55 796 27. doi: 10.1016/j.jor.2019.11.037 [published Online First: 2020/02/06]
- 58 797 44. Allom R, Colegate-Stone T, Gee M, et al. Outcome analysis of surgery for disorders of  
59 798 the rotator cuff: a comparison of subjective and objective scoring tools. *J Bone Joint*



- 1  
2  
3 799 *Surg Br* 2009;91(3):367-73. doi: 10.1302/0301-620X.91B3.20714 [published Online  
4 800 First: 2009/03/05]
- 5  
6 801 45. Constant CR, Gerber C, Emery RJ, et al. A review of the Constant score: modifications  
7 802 and guidelines for its use. *J Shoulder Elbow Surg* 2008;17(2):355-61. doi:  
8 803 10.1016/j.jse.2007.06.022
- 9  
10 804 46. Gilbert MK, Gerber C. Comparison of the subjective shoulder value and the Constant  
11 805 score. *J Shoulder Elbow Surg* 2007;16(6):717-21. doi: 10.1016/j.jse.2007.02.123  
12 806 [published Online First: 2007/12/07]
- 13  
14 807 47. Cappelleri JC, Bushmakin AG, McDermott AM, et al. Psychometric properties of a single-  
15 808 item scale to assess sleep quality among individuals with fibromyalgia. *Health and*  
16 809 *quality of life outcomes* 2009;7(1):54.
- 17  
18 810 48. Potter MQ, Wylie JD, Greis PE, et al. Psychological distress negatively affects self-  
19 811 assessment of shoulder function in patients with rotator cuff tears. *Clin Orthop Relat*  
20 812 *Res* 2014;472(12):3926-32. doi: 10.1007/s11999-014-3833-1
- 21  
22 813 49. Makhni EC, Meadows M, Hamamoto JT, et al. Patient Reported Outcomes Measurement  
23 814 Information System (PROMIS) in the upper extremity: the future of outcomes  
24 815 reporting? *Journal of Shoulder and Elbow Surgery* 2017;26(2):352-57. doi:  
25 816 10.1016/j.jse.2016.09.054
- 26  
27 817 50. Tubach F, Wells GA, Ravaud P, et al. Minimal clinically important difference, low disease  
28 818 activity state, and patient acceptable symptom state: methodological issues. *J*  
29 819 *Rheumatol* 2005;32(10):2025-9. [published Online First: 2005/10/06]
- 30  
31 820 51. Slankamenac K, Graf R, Barkun J, et al. The comprehensive complication index: a novel  
32 821 continuous scale to measure surgical morbidity. *Ann Surg* 2013;258(1):1-7. doi:  
33 822 10.1097/SLA.0b013e318296c732
- 34  
35 823 52. Sugaya H, Maeda K, Matsuki K, et al. Functional and structural outcome after  
36 824 arthroscopic full-thickness rotator cuff repair: single-row versus dual-row fixation.  
37 825 *Arthroscopy* 2005;21(11):1307-16. doi: 10.1016/j.arthro.2005.08.011 [published  
38 826 Online First: 2005/12/06]
- 39  
40 827 53. Collin P, Yoshida M, Delarue A, et al. Evaluating postoperative rotator cuff healing:  
41 828 Prospective comparison of MRI and ultrasound. *Orthop Traumatol Surg Res*  
42 829 2015;101(6 Suppl):S265-8. doi: 10.1016/j.otsr.2015.06.006 [published Online First:  
43 830 2015/08/19]
- 44  
45 831 54. Herdman M, Gudex C, Lloyd A, et al. Development and preliminary testing of the new  
46 832 five-level version of EQ-5D (EQ-5D-5L). *Qual Life Res* 2011;20(10):1727-36. doi:  
47 833 10.1007/s11136-011-9903-x [published Online First: 2011/04/12]
- 48  
49 834 55. Moor BK, Wieser K, Slankamenac K, et al. Relationship of individual scapular anatomy  
50 835 and degenerative rotator cuff tears. *J Shoulder Elbow Surg* 2014;23(4):536-41. doi:  
51 836 10.1016/j.jse.2013.11.008

- 1  
2  
3 837 56. Werner CM, Conrad SJ, Meyer DC, et al. Intermethod agreement and interobserver  
4 838 correlation of radiologic acromiohumeral distance measurements. *J Shoulder Elbow*  
5 839 *Surg* 2008;17(2):237-40. doi: 10.1016/j.jse.2007.06.002
- 7 840 57. Thomazeau H, Rolland Y, Lucas C, et al. Atrophy of the supraspinatus belly assessment  
8 841 by MRI in 55 patients with rotator cuff pathology. *Acta orthopaedica Scandinavica*  
9 842 1996;67(3):264-68.
- 12 843 58. Zanetti M, Gerber C, Hodler J. Quantitative assessment of the muscles of the rotator cuff  
13 844 with magnetic resonance imaging. *Investigative radiology* 1998;33(3):163-70.
- 15 845 59. Schiefer M, Mendonca R, Magnanini MM, et al. Intraobserver and interobserver  
16 846 agreement of Goutallier classification applied to magnetic resonance images. *J*  
17 847 *Shoulder Elbow Surg* 2015;24(8):1314-21. doi: 10.1016/j.jse.2015.02.011
- 20 848 60. Goutallier D, Postel JM, Bernageau J, et al. Fatty muscle degeneration in cuff ruptures.  
21 849 Pre- and postoperative evaluation by CT scan. *Clin Orthop Relat Res* 1994(304):78-  
22 850 83. [published Online First: 1994/07/01]
- 25 851 61. Patte D. Classification of rotator cuff lesions. *Clin Orthop Relat Res* 1990(254):81-6.  
26 852 [published Online First: 1990/05/01]
- 28 853 62. Okoroha KR, Mehran N, Duncan J, et al. Characterization of Rotator Cuff Tears:  
29 854 Ultrasound Versus Magnetic Resonance Imaging. *Orthopedics* 2016:1-7. doi:  
30 855 10.3928/01477447-20161013-04
- 32 856 63. Zumstein MA, Ladermann A, Raniga S, et al. The biology of rotator cuff healing. *Orthop*  
33 857 *Traumatol Surg Res* 2016 doi: 10.1016/j.otsr.2016.11.003 [published Online First:  
34 858 2017/01/04]
- 37 859 64. Audige L, Goldhahn S, Daigl M, et al. How to document and report orthopedic  
38 860 complications in clinical studies? A proposal for standardization. *Arch Orthop Trauma*  
39 861 *Surg* 2014;134(2):269-75. doi: 10.1007/s00402-011-1384-4
- 42 862 65. Rosenthal R, Hoffmann H, Clavien PA, et al. Definition and Classification of  
43 863 Intraoperative Complications (CLASSIC): Delphi Study and Pilot Evaluation. *World J*  
44 864 *Surg* 2015;39(7):1663-71. doi: 10.1007/s00268-015-3003-y
- 46 865 66. Dell-Kuster S, Gomes NV, Gawria L, et al. Prospective validation of classification of  
47 866 intraoperative adverse events (ClassIntra): international, multicentre cohort study.  
48 867 *BMJ* 2020;370:m2917. doi: 10.1136/bmj.m2917 [published Online First: 2020/08/28]
- 51 868 67. Flury M, Kolling C, Grobet C, et al. Implementation of a local outcome register for  
52 869 arthroscopic rotator cuff tear repair. *Obere Extremität* 2014;10(1):33-40. doi:  
53 870 10.1007/s11678-014-0299-4
- 56 871 68. Vach W. Regression models as a tool in medical research. Boca Raton, FL: CRC Press,  
57 872 Taylor & Francis Group 2013.
- 59 873 69. Peduzzi P, Concato J, Kemper E, et al. A simulation study of the number of events per  
60 874 variable in logistic regression analysis. *J Clin Epidemiol* 1996;49(12):1373-9.



- 1  
2  
3 875 70. Hemingway H, Croft P, Perel P, et al. Prognosis research strategy (PROGRESS) 1: a  
4 876 framework for researching clinical outcomes. *BMJ* 2013;346:e5595. doi:  
5  
6 877 10.1136/bmj.e5595
- 7 878 71. Harris PA, Taylor R, Thielke R, et al. Research electronic data capture (REDCap)--a  
8  
9 879 metadata-driven methodology and workflow process for providing translational  
10 880 research informatics support. *Journal of biomedical informatics* 2009;42(2):377-81.  
11 881 doi: 10.1016/j.jbi.2008.08.010 [published Online First: 2008/10/22]
- 12 882 72. REDCap web-based Electronic Data Capture system 2017 [Available from: [www.project-](http://www.project-redcap.org)  
13 883 [redcap.org](http://www.project-redcap.org) accessed 15.03.2017 2017.
- 14 884 73. Steyerberg EW, Vergouwe Y. Towards better clinical prediction models: seven steps for  
15 885 development and an ABCD for validation. *European Heart Journal* 2014;35(29):1925-  
16 886 31. doi: 10.1093/eurheartj/ehu207
- 17 887 74. Steyerberg EW. Clinical prediction models, 2009.
- 18 888 75. Team RC. R: A language and environment for statistical computing. : R Foundation for  
19 889 Statistical Computing, Vienna, Austria; 2016 [Available from: [www.R-project.org](http://www.R-project.org).
- 20 890 76. Porembka MR, Hall BL, Hirbe M, et al. Quantitative weighting of postoperative  
21 891 complications based on the accordion severity grading system: demonstration of  
22 892 potential impact using the american college of surgeons national surgical quality  
23 893 improvement program. *Journal of the American College of Surgeons*  
24 894 2010;210(3):286-98. doi: 10.1016/j.jamcollsurg.2009.12.004
- 25 895 77. de la Rosette JJ, Opondo D, Daels FP, et al. Categorisation of complications and  
26 896 validation of the Clavien score for percutaneous nephrolithotomy. *European urology*  
27 897 2012;62(2):246-55.
- 28 898 78. Vandembroucke JP, Von Elm E, Altman DG, et al. Strengthening the Reporting of  
29 899 Observational Studies in Epidemiology (STROBE): explanation and elaboration.  
30 900 *PLoS Med* 2007;4(10):e297.
- 31 901 79. Collins GS, Reitsma JB, Altman DG, et al. Transparent Reporting of a multivariable  
32 902 prediction model for Individual Prognosis or Diagnosis (TRIPOD): the TRIPOD  
33 903 statement. *Ann Intern Med* 2015;162(1):55-63. doi: 10.7326/M14-0697 [published  
34 904 Online First: 2015/01/07]
- 35 905 80. Moher D, Liberati A, Tetzlaff J, et al. Preferred reporting items for systematic reviews and  
36 906 meta-analyses: the PRISMA statement. *PLoS Med* 2009;6(7):e1000097. doi:  
37 907 10.1371/journal.pmed.1000097 [published Online First: 2009/07/22]
- 38 908 81. Hess CW, Brückner C, Kaiser T, et al. Authorship in scientific publications: analysis and  
39 909 recommendations. *Swiss medical weekly* 2015;145  
40  
41  
42  
43  
44  
45  
46  
47  
48  
49  
50  
51  
52  
53  
54  
55  
56  
57  
58  
59  
60

1  
2  
3 911 **Figure legend**

4  
5 912

6  
7 913 **Figure 1:** Flowchart of study procedures

8  
9 914 w = week; mo = month; FU = follow-up; MRI = Magnetic Resonance Imaging; CT = Arthro-

10  
11 915 Computer Tomography (\*if MRI not possible); Motion = Shoulder range of motion; CS =

12  
13 916 Constant Score; RC = Rotator Cuff; AE = Adverse Event; Rehab. = recall on postoperative

14  
15 917 rehabilitation; DE = German; FR = French; IT = Italian; EN = English; NRS = Numeric Rating

16  
17 918 Scale; OSS = Oxford Shoulder Score; SSV = Subjective Shoulder Value; EQ-5D-5L =

18  
19 919 European Quality of Life 5 Dimensions 5 Level questionnaire; CES = Core Event Set; AE

20  
21 920 survey = surgeons and patients survey regarding AE severity (sev)

22  
23  
24 921

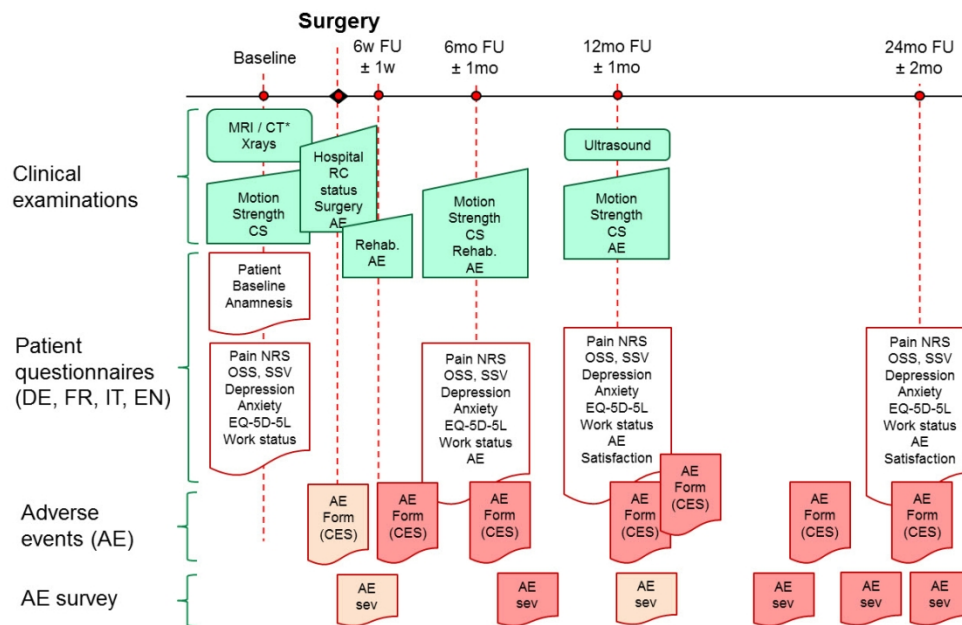

Figure 1: Flowchart of study procedures

28 w = week; mo = month; FU = follow-up; MRI = Magnetic Resonance Imaging; CT = Arthro-Computer  
 29 Tomography (\*if MRI not possible); Motion = Shoulder range of motion; CS = Constant Score; RC = Rotator  
 30 Cuff; AE = Adverse Event; Rehab. = recall on postoperative rehabilitation; DE = German; FR = French; IT =  
 31 Italian; EN = English; NRS = Numeric Rating Scale; OSS = Oxford Shoulder Score; SSV = Subjective  
 32 Shoulder Value; EQ-5D-5L = European Quality of Life 5 Dimensions 5 Level questionnaire; CES = Core  
 33 Event Set; AE survey = surgeons and patients survey regarding AE severity (sev)

342x220mm (96 x 96 DPI)

**Supplement file 1**

**Article title** Protocol for the ARCR\_Pred cohort-study: Swiss-wide multicenter evaluation and prediction of core outcomes in arthroscopic rotator cuff repair

**Journal name** BMJ Open Access

**Author names** Laurent Audigé, Heiner C. Bucher, Soheila Aghlmandi, Thomas Stojanov, David Schwappach, Sabina Hunziker, Christian Candrian, Gregory Cunningham, Holger Durchholz, Karim Eid, Matthias Flury, Bernhard Jost, Alexandre Lädermann, Beat Moor, Philipp Moroder, Claudio Rosso, Michael Schär, Markus Scheibel, Christoph Spormann, Thomas Suter, Karl Wieser, Matthias A. Zumstein, ARCR\_Pred Study Group\*, Andreas Müller

**Corresponding author** Laurent Audigé, Schulthess Klinik, CH-8008 Zurich, Switzerland

**e-mail address** laurent.audige@kws.ch

\* Members of the ARCR\_Pred study group are listed in the main publication of this project protocol.

**Patient information sheet and informed consent form (English version) for the project site “University Hospital of Basel” (USB)**

## Engl. Surgical safety and effectiveness in orthopaedics: evaluation of an international consensus core set of adverse events in arthroscopic rotator cuff repair

This project has been organised by: PD Dr. Andreas Müller (project leader; Deputy Consultant of Orthopaedics, Shoulder/Elbow team leader, Orthopaedic and Traumatology Department, University Hospital of Basel) and Prof. Dr. Laurent Audigé (project manager; Research Associate, Orthopaedic and Traumatology Department, University Hospital of Basel and Head of Research Group Upper Extremities, Department of Research and Development, Schulthess Clinic, Zurich)

Sponsor: University Hospital of Basel, PD Dr. Andreas Müller, Deputy Consultant of Orthopaedics and Traumatology

Dear Sir / Madam,

We would like to ask you if you are interested in participating in a research project. The planned project is first presented as a short summary in the table provided below followed by a more detailed description.

### Summary of the project

|   |                                                                                                                                                                                                                                                                                                                                                                                                                                                                                                                                                                                                                                                                                                                                                                                                                     |
|---|---------------------------------------------------------------------------------------------------------------------------------------------------------------------------------------------------------------------------------------------------------------------------------------------------------------------------------------------------------------------------------------------------------------------------------------------------------------------------------------------------------------------------------------------------------------------------------------------------------------------------------------------------------------------------------------------------------------------------------------------------------------------------------------------------------------------|
| 1 | <p><b>Aim of the project</b></p> <p>The research project will investigate how easily the most important results are predicted following surgical interventions to treat <b>tears of the shoulder muscle (rotator cuff) tendons</b>. In order to do this, we will use and assess a predefined set of adverse events (such as frozen shoulder or persistent pain) in practice.</p>                                                                                                                                                                                                                                                                                                                                                                                                                                    |
| 2 | <p><b>Choice</b></p> <p>You are an adult suffering from a <b>tear of the shoulder muscle tendons</b>, which can be treated with an initial, minimally invasive (i.e. arthroscopic) surgical intervention. That is why we are sending you this information leaflet.</p>                                                                                                                                                                                                                                                                                                                                                                                                                                                                                                                                              |
| 3 | <p><b>General information about the project</b></p> <p>The collection of clinical data following surgical interventions is very important, and helps to support an established decision-making process within the orthopaedic field. We are carrying out this project so that we can better evaluate and predict the results following <b>the repair of shoulder muscle tendon tears</b>. This evaluation is being carried out on a representative number of male and female patients in Switzerland.</p> <p>Patient safety is essential here. A list of possible adverse events following the arthroscopic intervention was recently defined by a group of more than 80 experts in the field. We would now like to better understand the development of these adverse events from the patient's point of view.</p> |
| 4 | <p><b>Procedure</b></p> <p>This project will last four years. In total, 970 patients from various clinics in Switzerland and one in Germany will be included in the study within the first year. Various examinations (e.g. measurements of range of motion and strength) will be carried out in the clinic before the operation (= preoperative) and then at the 6- and 12-month postoperative time points. At these times and at 2 years post-surgery, you will receive a questionnaire to complete. We will use ultrasound to check how the tendon is healing twelve months after the operation. Any adverse events will be evaluated independently by the doctor and the patient in question.</p>                                                                                                               |

|    |                                                                                                                                                                                                                                                                                                                                                                                        |
|----|----------------------------------------------------------------------------------------------------------------------------------------------------------------------------------------------------------------------------------------------------------------------------------------------------------------------------------------------------------------------------------------|
| 5  | <p><b>Usefulness</b><br/>You will gain no personal benefit from participating in the project. However, the results could be important to others who have the same condition.</p>                                                                                                                                                                                                       |
| 6  | <p><b>Rights</b><br/>You decide voluntarily whether you want to participate in this project or not. Your decision does not affect your medical treatment/care and you do not have to justify it.</p>                                                                                                                                                                                   |
| 7  | <p><b>Duties</b><br/>If you participate, we ask you to adhere to certain requirements (e.g. attending visits and completing the questionnaires).</p>                                                                                                                                                                                                                                   |
| 8  | <p><b>Risks</b><br/>You are not exposed to any additional risk by participating in the project.</p>                                                                                                                                                                                                                                                                                    |
| 9  | <p><b>Outcomes</b><br/>You will be informed of new results during the project. We will promptly inform you of any additional findings (known as incidental findings) that are detected during the regular study examinations, which may affect your health directly. Any further course of action will then be discussed in detail with you.</p>                                       |
| 10 | <p><b>Confidentiality of data and samples</b><br/>We collect your personal and medical data from you. The Swiss National Science Foundation supports the exchange and reuse of research data. The data will be used for other projects if you give your separate consent. We comply with all legal data protection regulations. All parties involved are bound by confidentiality.</p> |
| 11 | <p><b>Withdrawal</b><br/>You can withdraw from the project at any time and no longer participate. The data collected so far are still being evaluated.</p>                                                                                                                                                                                                                             |
| 12 | <p><b>Indemnity</b><br/>You will not receive any compensation for participating in the study. Neither your health insurance provider nor you will incur any additional costs from your participation in the study.</p>                                                                                                                                                                 |
| 13 | <p><b>Liability</b><br/>The liability insurance of the project management is liable for any damages within the scope of the project.</p>                                                                                                                                                                                                                                               |
| 14 | <p><b>Funding</b><br/>The project is paid for by the Swiss National Science Foundation.</p>                                                                                                                                                                                                                                                                                            |
| 15 | <p><b>Contact person:</b><br/>You can receive information on all your questions at any time:</p> <p>PD Dr. Andreas Müller, Senior Consultant, Head Shoulder and Elbow,<br/>University Hospital of Basel, Spitalstrasse 21, CH-403 Basel<br/>Tel 061 315 25 17 , Email A.Mueller@usb.ch</p>                                                                                             |

## More detailed information

### 1. Aim of the project

The aim of this project is to investigate how the most important results (for example, the occurrence of adverse events or shoulder function) are easily predicted following a surgical intervention to treat **tears of the shoulder muscle tendons**. Furthermore, we want to investigate how well a predefined set of adverse events, which could occur as part of such a surgical intervention, corresponds to what actually occurs in practice.

### 2. Choice

Participation is open to anyone with a torn tendon in the shoulder muscles, which can be repaired with minimally invasive (i.e. arthroscopic) surgery.

**Important:** This must be the first intervention on the shoulder in question.

Participation is not open to anyone for whom a detailed medical examination would not be possible or who cannot be called back for check-ups within the follow-up period (e.g. if they live outside Switzerland). Underage persons should also not participate.

### 3. General information about the project

This project will be carried out in accordance with the laws of Switzerland. The responsible ethics committee has reviewed and approved this project

The collection of clinical data following surgical interventions is very important. You will help:

- to assess the effectiveness and safety of the intervention,
- to make comparisons with other methods,
- to support an established decision-making process within the orthopaedic field.

The study intends to document the most important events following arthroscopic interventions, especially in terms of:

- safety (occurrence of adverse events),
- healing of the tendon repair,
- shoulder pain and function,
- the general state of health and quality of life as well as
- patient satisfaction.

Patients' socio-demographic characteristics, examination parameters and treatment parameters will be investigated to enable a prediction of these events to be made.

In most areas of orthopaedics, there is currently no international standard for the description of adverse events (often known as complications) resulting from surgical interventions. In shoulder orthopaedics, such a list of events does not exist for arthroscopic interventions used in the treatment of **tears of the shoulder muscle tendons (rotator cuff)**. For this reason, the Shoulder and Elbow Surgery research group at the Schulthess Clinic, Zurich, working together with the Orthopaedic and Traumatology Department of the University Hospital of Basel and over 80 experts working in the field of arthroscopy for rotator cuff tears, have defined a list of possible adverse events.

The aim is to apply and evaluate this predefined list of events. Each event will be evaluated independently by the doctor and the patient in question.



This project is supported by the Swiss National Science Foundation and will last four years. In total, 970 patients will be included in the study within the first year. These patients will be recruited from various clinics in Switzerland and one clinic in Germany. At the University Hospital of Basel about 60 patients are recruited.

#### 4. Procedure

The following diagram shows the course of study events from the time of diagnosis to the follow-up appointment at two years post-surgery.

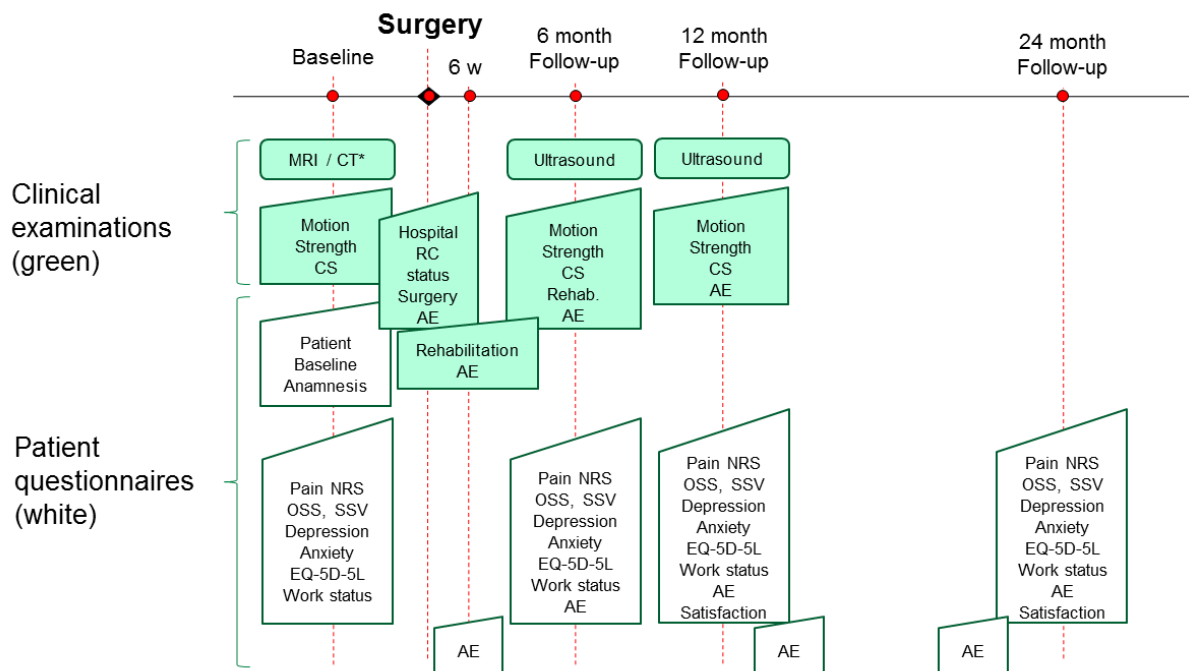

6 W = 6-week follow-up; AE = adverse events

Figure 1: Schematic representation of the study's progress

For your diagnosis, you will be examined by the doctor using various methods (e.g. functional testing, radiological and magnetic resonance imaging (= MRI)) during the first consultation. If you agree to participate in the project, you will receive a questionnaire, which will ask you to provide your personal details and estimate your current level of functional ability in everyday life. Shortly before the operation, your surgeon will record detailed information about your shoulder injury and the surgical intervention. Six weeks after the operation, your surgeon will ask you about your pain levels, rehabilitation programme and the occurrence of any adverse events.

During further follow-up appointments (at 6 and 12 months post-surgery), various examinations (e.g. measurements of range of motion and strength, see figure 1) are routinely performed in the clinic. An independent examiner will carry out an ultrasound routinely 12 months after the operation to document how the tendon is healing. You will also receive a questionnaire to complete. If you wish, you can complete this questionnaire at home - either on paper or electronically by following an invitation link that will be emailed to you. At the end of this document, you will be asked to provide your email address, if you do prefer to receive the electronic version of the questionnaire. Various questionnaires are already routinely recorded at the University Hospital of Basel.

Two years after the operation, you will be sent the questionnaire again by post or email (no further check-ups will take place at the clinic). This takes place within the framework of the project. If you have experienced one or more adverse events, the questionnaire will ask you to rate each event by severity and by its relationship to your treatment. The study doctors will evaluate all reported events by severity without knowing the patient, to whom these relate or the clinic in which the events occurred.

Each visit to the clinic ( before surgery and 6- and 12-months post-surgery) will last 40 to 60 minutes including all the examinations. Completing the patient questionnaire will take an additional 20 to 30 minutes. An adverse event tends to be evaluated in only a few minutes.

We may have to exclude you from this project prematurely. This can occur if no tear of the rotator cuff can be confirmed intraoperatively (i.e. during the operation) (this occurs very rarely) or if a tendon repair is not possible without additional interventions on the shoulder (a so-called irreparable tear). The study doctor will inform you of any such exclusion from the project.

## 5. Usefulness

You will not personally benefit from participating in the project. The results can be important for others who have the same condition. As described above, the study aims to enable better evaluation and prediction of the risk of adverse events and the effectiveness of a surgical intervention. We want to support the decision-making processes of future interventions of this kind.

## 6. Rights

You're volunteering. If you do not want to participate or later withdraw your participation, you do not have to justify this. Your medical treatment/care is guaranteed regardless of your decision. You may ask questions about participation and the project at any time. Please contact the person named at the end of this information.

## 7. Duties

As a participant, it is necessary that you

- adhere to the necessary specifications and requirements of the project management.
- inform your investigator/project management about the course of the disease and report new symptoms, new complaints and changes in well-being.
- inform your investigator/project management about the simultaneous treatment and therapy with another doctor and about taking medication.

## 8. Risks

You are not exposed to any additional risk by participating in the project.

## 9. Outcomes

The investigator/project manager will inform you during the project about any new findings that may affect the benefit or your safety and thus your consent to participate. You will be informed of random findings which may contribute to the prevention, detection or treatment of existing or future diseases.

## 10. Confidentiality of data and samples

Your personal and medical data will be collected for this project. Very few professionals will see your unencrypted data, and only to perform tasks within the scope of the project. Data collection for study purposes is encrypted. Encryption means that all reference data that could identify you (name, date of birth) are deleted and replaced by a key. The key list always remains in the institution/hospital. Those who do not know the key cannot therefore draw any conclusions about you. In the

case of a publication, the summarised data cannot therefore be traced back to you as an individual. Your name will never appear on the Internet or in any publication. Sometimes there is a requirement in a journal for publication that individual data (so-called raw data) must be transmitted. If individual data must be transmitted, then the data is always encrypted and cannot be traced back to you as a person. All persons who have access to your data within the scope of the project are subject to confidentiality. The requirements of data protection are adhered to and you as a participating person have the right to inspect your data at any time.

If data are stored on site, it is a database for research purposes.

Each centre will encode and save the data centrally in the project database (server location: Schulthess Clinic, Zurich). The data will be deleted 10 years after the end of the project.

It is possible that your data may be used for other investigations (projects) at a later date or that they may be sent to another databank in Switzerland for investigations (further use) not yet defined in more detail. This other database must meet the same standards as the database for this project. For this further use we ask you to sign a further declaration of consent at the very end of this document.

This project may be reviewed by the relevant ethics committee or by the institution that initiated the project. The project manager may need to disclose your personal and medical information for such checks. All persons must maintain absolute confidentiality. We comply with all data protection regulations and will not make your name public either in a publication or on the Internet.

It is possible that your aftercare physician will be contacted to provide information about your medical condition.

#### **11. Withdrawal**

You can stop at any time and withdraw from the project if you wish. The data collected so far are still evaluated in encrypted form, otherwise the entire project loses its value. It is not possible to anonymize your data in case of withdrawal, i.e. the data remain encrypted. Please check whether you agree with this before you participate in the project.

#### **12. Indemnity**

If you participate in this project, you will not receive any compensation. You or your health insurance company will not incur any costs for participation.

#### **13. Liability**

The prerequisites and procedure relating to liability and safeguarding in the event of a claim are legally regulated. If you suffer a health impairment as a result of the study, please contact the study doctor. The institution that is responsible for carrying out the study is liable for the claim, if you can prove that the injury is due to the project-specific examinations. Liability will not be accepted if the project manager can prove that the injury is only minor and temporary, and does not extend beyond the degree expected by current scientific knowledge.

#### **14. Funding**

The project is being funded by the Swiss National Science Foundation (SNSF).

#### **15. Contact person(s)**

If you have any questions, concerns, or emergencies that arise during or after the project, you can always contact one of these contacts.

1  
2  
3  
4 Head at the study location:

5 PD Dr. Andreas Müller, Senior Consultant, Head Shoulder and Elbow

6 University Hospital of Basel, Spitalstrasse 21, CH-403 Basel

7 Tel 061 315 25 17 , Email [A.Mueller@usb.ch](mailto:A.Mueller@usb.ch)

8  
9 24-hour emergency number: +41 61 265 25 25

10  
11 Local project coordination:

12  
13 PD Dr. Andreas Müller, Senior Consultant, Head Shoulder and Elbow

14 University Hospital of Basel, Spitalstrasse 21, CH-403 Basel

15 Tel 061 315 25 17 , Email [A.Mueller@usb.ch](mailto:A.Mueller@usb.ch)

## Declaration of consent

### Written declaration of consent for participation in a study project

Please read this form carefully. Please ask if you do not understand or want to know something

**BASEC number (after submission):**

**Title of the project  
(scientific and lay):**

Surgical safety and effectiveness in orthopaedics:  
Swiss-wide multicenter evaluation and prediction of  
core outcomes in arthroscopic rotator cuff  
reconstruction

Surgical safeguarding and effectiveness in  
orthopaedics: Swiss-wide multicentre evaluation and  
prediction of the most important effects following  
arthroscopic repair of shoulder tendons (rotator cuff  
reconstruction)

**Responsible institution  
(Project management with address):**

University Hospital of Basel  
PD Dr. Andreas Müller  
Orthopaedics and Traumatology  
Spitalstrasse 21, CH-4031 Basel

**Place of implementation:**

Universitätsspital Basel

**Head of the project at the place of  
study:**

PD Dr. Andreas Müller

**Participant:**

Name, first name: \_\_\_\_\_

Date of Birth: \_\_\_\_\_

Female  Male

The undersigned investigator informed me verbally and in writing about the purpose, the course of the project, about possible advantages and disadvantages as well as about possible risks.

- I voluntarily participate in this project and accept the content of the written information provided on the above mentioned project. I've had plenty of time to make my decision.
- My questions concerning the participation in this project have been answered. I keep the written information and receive a copy of my written consent.
- I agree that the responsible experts of the project management/client of the project and the ethics committee responsible for this project may inspect my unencrypted data for verification and control purposes, but in strict compliance with confidentiality.
- I will be informed of study results or random findings that directly affect my health. If I don't want that, I'll inform my investigator.
- I know that my health-related and personal data can only be passed on in encrypted form for research purposes **for this project**.

- In the event of further treatment outside the test centre, I authorise my after-treating doctor(s) to forward my after-treatment data relevant to the project to the investigator/project management.
- I can withdraw from participation at any time and without giving reasons, without having any disadvantages in further medical treatment/care. The data collected so far will still be used for the evaluation of the project.
- The liability insurance of the hospital/institution covers any damages.
- I am aware that the obligations stated in the participant information must be complied with.
- If you agree that your email address can be used solely for receiving questionnaires and project-related communications, please enter it here:

\_\_\_\_\_@\_\_\_\_\_

|             |                          |
|-------------|--------------------------|
| Place, Date | Signature of participant |
|             |                          |

**Confirmation from the investigator:** I hereby confirm that I have explained the nature, significance and scope of the project to this participant. I assure you that I will fulfil all obligations in connection with this project in accordance with applicable law. If, at any time during the implementation of the project, I become aware of any aspects that might affect the participant's willingness to participate in the project, I will inform the participant immediately.

|             |                                                                                                                     |
|-------------|---------------------------------------------------------------------------------------------------------------------|
| Place, Date | Name and first name of the informing investigator in block capitals<br><br>Signature of the investigating physician |
|-------------|---------------------------------------------------------------------------------------------------------------------|

**Declaration of consent for the further use of data in encrypted form.  
(for further use of data of THIS project)**

**Participant:**

Name, first name: \_\_\_\_\_

Date of birth: \_\_\_\_\_

Female

Male

I allow my data from this project to be used in encrypted form for medical research. This means that the data may be stored in a databank and used for future, not yet defined research projects for an indefinite period of time. This consent is unlimited.

I decide voluntarily and can revoke this decision at any time. When I step back, my data is anonymized. I simply inform my investigator/project manager and do not have to justify this decision.

I understand that the data are encrypted and the code is kept safe. The data can be sent to other databanks in Switzerland and abroad for analysis if they comply with the same standards as in Switzerland. All legal requirements regarding data protection are complied with.

Normally, all data are evaluated in their entirety and the results published in summary form. Should a result be relevant for me, it is possible that I will be contacted via my investigator. If I do not wish this, I will inform my investigator/project manager.

If results from the data are handled for commercial purposes, I hereby make no claims on any part of this commercial use.

|             |                          |
|-------------|--------------------------|
| Place, Date | Signature of participant |
|-------------|--------------------------|

**Confirmation from the investigator:** I hereby confirm that I have explained to this participant the nature, significance and implications of the further use of data.

|             |                                                                     |
|-------------|---------------------------------------------------------------------|
| Place, Date | Name and first name of the informing investigator in block capitals |
|             | Signature of the investigating physician                            |



# Reporting checklist for protocol of a clinical trial.

Based on the SPIRIT guidelines.

## Instructions to authors

Complete this checklist by entering the page numbers from your manuscript where readers will find each of the items listed below.

Your article may not currently address all the items on the checklist. Please modify your text to include the missing information. If you are certain that an item does not apply, please write "n/a" and provide a short explanation.

Upload your completed checklist as an extra file when you submit to a journal.

In your methods section, say that you used the SPIRIT reporting guidelines, and cite them as:

Chan A-W, Tetzlaff JM, Gøtzsche PC, Altman DG, Mann H, Berlin J, Dickersin K, Hróbjartsson A, Schulz KF, Parulekar WR, Krleža-Jerić K, Laupacis A, Moher D. SPIRIT 2013 Explanation and Elaboration: Guidance for protocols of clinical trials. *BMJ*. 2013;346:e7586

|                                             |                     | Reporting Item                                                                                               | Page Number |
|---------------------------------------------|---------------------|--------------------------------------------------------------------------------------------------------------|-------------|
| <b>Administrative information</b>           |                     |                                                                                                              |             |
| Title                                       | <a href="#">#1</a>  | Descriptive title identifying the study design, population, interventions, and, if applicable, trial acronym | 1           |
| Trial registration                          | <a href="#">#2a</a> | Trial identifier and registry name. If not yet registered, name of intended registry                         | 4           |
| Trial registration: data set                | <a href="#">#2b</a> | All items from the World Health Organization Trial Registration Data Set                                     | n.a.        |
| Protocol version                            | <a href="#">#3</a>  | Date and version identifier                                                                                  | 4           |
| Funding                                     | <a href="#">#4</a>  | Sources and types of financial, material, and other support                                                  | 4           |
| Roles and responsibilities: contributorship | <a href="#">#5a</a> | Names, affiliations, and roles of protocol contributors                                                      | 4           |

|    |                           |                     |                                                          |      |
|----|---------------------------|---------------------|----------------------------------------------------------|------|
| 1  | Roles and                 | <a href="#">#5b</a> | Name and contact information for the trial sponsor       | 4    |
| 2  | responsibilities:         |                     |                                                          |      |
| 3  | sponsor contact           |                     |                                                          |      |
| 4  | information               |                     |                                                          |      |
| 5  |                           |                     |                                                          |      |
| 6  |                           |                     |                                                          |      |
| 7  | Roles and                 | <a href="#">#5c</a> | Role of study sponsor and funders, if any, in study      | 4    |
| 8  | responsibilities:         |                     | design; collection, management, analysis, and            |      |
| 9  | sponsor and funder        |                     | interpretation of data; writing of the report; and the   |      |
| 10 |                           |                     | decision to submit the report for publication,           |      |
| 11 |                           |                     | including whether they will have ultimate authority      |      |
| 12 |                           |                     | over any of these activities                             |      |
| 13 |                           |                     |                                                          |      |
| 14 |                           |                     |                                                          |      |
| 15 |                           |                     |                                                          |      |
| 16 |                           |                     |                                                          |      |
| 17 | Roles and                 | <a href="#">#5d</a> | Composition, roles, and responsibilities of the          | 4    |
| 18 | responsibilities:         |                     | coordinating centre, steering committee, endpoint        |      |
| 19 | committees                |                     | adjudication committee, data management team,            |      |
| 20 |                           |                     | and other individuals or groups overseeing the trial,    |      |
| 21 |                           |                     | if applicable (see Item 21a for data monitoring          |      |
| 22 |                           |                     | committee)                                               |      |
| 23 |                           |                     |                                                          |      |
| 24 |                           |                     |                                                          |      |
| 25 |                           |                     |                                                          |      |
| 26 |                           |                     |                                                          |      |
| 27 | <b>Introduction</b>       |                     |                                                          |      |
| 28 |                           |                     |                                                          |      |
| 29 | Background and            | <a href="#">#6a</a> | Description of research question and justification for   | 7    |
| 30 | rationale                 |                     | undertaking the trial, including summary of relevant     |      |
| 31 |                           |                     | studies (published and unpublished) examining            |      |
| 32 |                           |                     | benefits and harms for each intervention                 |      |
| 33 |                           |                     |                                                          |      |
| 34 |                           |                     |                                                          |      |
| 35 |                           |                     |                                                          |      |
| 36 | Background and            | <a href="#">#6b</a> | Explanation for choice of comparators                    | n.a. |
| 37 | rationale: choice of      |                     |                                                          |      |
| 38 | comparators               |                     |                                                          |      |
| 39 |                           |                     |                                                          |      |
| 40 |                           |                     |                                                          |      |
| 41 | Objectives                | <a href="#">#7</a>  | Specific objectives or hypotheses                        | 9    |
| 42 |                           |                     |                                                          |      |
| 43 |                           |                     |                                                          |      |
| 44 | Trial design              | <a href="#">#8</a>  | Description of trial design including type of trial (eg, | 9    |
| 45 |                           |                     | parallel group, crossover, factorial, single group),     |      |
| 46 |                           |                     | allocation ratio, and framework (eg, superiority,        |      |
| 47 |                           |                     | equivalence, non-inferiority, exploratory)               |      |
| 48 |                           |                     |                                                          |      |
| 49 |                           |                     |                                                          |      |
| 50 |                           |                     |                                                          |      |
| 51 | <b>Methods:</b>           |                     |                                                          |      |
| 52 | <b>Participants,</b>      |                     |                                                          |      |
| 53 | <b>interventions, and</b> |                     |                                                          |      |
| 54 | <b>outcomes</b>           |                     |                                                          |      |
| 55 |                           |                     |                                                          |      |
| 56 |                           |                     |                                                          |      |
| 57 | Study setting             | <a href="#">#9</a>  | Description of study settings (eg, community clinic,     | 9    |
| 58 |                           |                     |                                                          |      |
| 59 |                           |                     |                                                          |      |
| 60 |                           |                     |                                                          |      |

|    |                      |                                                                             |      |
|----|----------------------|-----------------------------------------------------------------------------|------|
| 1  |                      | academic hospital) and list of countries where data                         |      |
| 2  |                      | will be collected. Reference to where list of study                         |      |
| 3  |                      | sites can be obtained                                                       |      |
| 4  |                      |                                                                             |      |
| 5  | Eligibility criteria | <a href="#">#10</a> Inclusion and exclusion criteria for participants. If   | 10   |
| 6  |                      | applicable, eligibility criteria for study centres and                      |      |
| 7  |                      | individuals who will perform the interventions (eg,                         |      |
| 8  |                      | surgeons, psychotherapists)                                                 |      |
| 9  |                      |                                                                             |      |
| 10 |                      |                                                                             |      |
| 11 |                      |                                                                             |      |
| 12 | Interventions:       | <a href="#">#11a</a> Interventions for each group with sufficient detail to | 10   |
| 13 | description          | allow replication, including how and when they will                         |      |
| 14 |                      | be administered                                                             |      |
| 15 |                      |                                                                             |      |
| 16 |                      |                                                                             |      |
| 17 | Interventions:       | <a href="#">#11b</a> Criteria for discontinuing or modifying allocated      | n.a. |
| 18 | modifications        | interventions for a given trial participant (eg, drug                       |      |
| 19 |                      | dose change in response to harms, participant                               |      |
| 20 |                      | request, or improving / worsening disease)                                  |      |
| 21 |                      |                                                                             |      |
| 22 |                      |                                                                             |      |
| 23 |                      |                                                                             |      |
| 24 | Interventions:       | <a href="#">#11c</a> Strategies to improve adherence to intervention        | n.a. |
| 25 | adherence            | protocols, and any procedures for monitoring                                |      |
| 26 |                      | adherence (eg, drug tablet return; laboratory tests)                        |      |
| 27 |                      |                                                                             |      |
| 28 |                      |                                                                             |      |
| 29 |                      |                                                                             |      |
| 30 | Interventions:       | <a href="#">#11d</a> Relevant concomitant care and interventions that       | 10   |
| 31 | concomitant care     | are permitted or prohibited during the trial                                |      |
| 32 |                      |                                                                             |      |
| 33 |                      |                                                                             |      |
| 34 | Outcomes             | <a href="#">#12</a> Primary, secondary, and other outcomes, including       | 11   |
| 35 |                      | the specific measurement variable (eg, systolic                             |      |
| 36 |                      | blood pressure), analysis metric (eg, change from                           |      |
| 37 |                      | baseline, final value, time to event), method of                            |      |
| 38 |                      | aggregation (eg, median, proportion), and time                              |      |
| 39 |                      | point for each outcome. Explanation of the clinical                         |      |
| 40 |                      | relevance of chosen efficacy and harm outcomes is                           |      |
| 41 |                      | strongly recommended                                                        |      |
| 42 |                      |                                                                             |      |
| 43 |                      |                                                                             |      |
| 44 |                      |                                                                             |      |
| 45 |                      |                                                                             |      |
| 46 | Participant timeline | <a href="#">#13</a> Time schedule of enrolment, interventions               | 13   |
| 47 |                      | (including any run-ins and washouts), assessments,                          |      |
| 48 |                      | and visits for participants. A schematic diagram is                         |      |
| 49 |                      | highly recommended (see Figure)                                             |      |
| 50 |                      |                                                                             |      |
| 51 |                      |                                                                             |      |
| 52 |                      |                                                                             |      |
| 53 | Sample size          | <a href="#">#14</a> Estimated number of participants needed to              | 15   |
| 54 |                      | achieve study objectives and how it was                                     |      |
| 55 |                      | determined, including clinical and statistical                              |      |
| 56 |                      | assumptions supporting any sample size                                      |      |
| 57 |                      |                                                                             |      |
| 58 |                      |                                                                             |      |
| 59 |                      |                                                                             |      |
| 60 |                      |                                                                             |      |

calculations

1  
2  
3 Recruitment [#15](#) Strategies for achieving adequate participant 16  
4 enrolment to reach target sample size  
5

6 **Methods:**

7 **Assignment of**  
8 **interventions (for**  
9 **controlled trials)**  
10  
11

12  
13 Allocation: sequence [#16a](#) Method of generating the allocation sequence (eg, n.a.  
14 generation computer-generated random numbers), and list of  
15 any factors for stratification. To reduce predictability  
16 of a random sequence, details of any planned  
17 restriction (eg, blocking) should be provided in a  
18 separate document that is unavailable to those who  
19 enrol participants or assign interventions  
20  
21  
22

23  
24 Allocation [#16b](#) Mechanism of implementing the allocation n.a.  
25 concealment sequence (eg, central telephone; sequentially  
26 mechanism numbered, opaque, sealed envelopes), describing  
27 any steps to conceal the sequence until  
28 interventions are assigned  
29  
30  
31

32  
33 Allocation: [#16c](#) Who will generate the allocation sequence, who will n.a.  
34 implementation enrol participants, and who will assign participants  
35 to interventions  
36  
37

38 Blinding (masking) [#17a](#) Who will be blinded after assignment to n.a.  
39 interventions (eg, trial participants, care providers,  
40 outcome assessors, data analysts), and how  
41  
42

43 Blinding (masking): [#17b](#) If blinded, circumstances under which unblinding is n.a.  
44 emergency permissible, and procedure for revealing a  
45 unblinding participant's allocated intervention during the trial  
46  
47

48 **Methods: Data**  
49 **collection,**  
50 **management, and**  
51 **analysis**  
52  
53

54  
55 Data collection plan [#18a](#) Plans for assessment and collection of outcome, 16  
56 baseline, and other trial data, including any related  
57 processes to promote data quality (eg, duplicate  
58  
59

measurements, training of assessors) and a description of study instruments (eg, questionnaires, laboratory tests) along with their reliability and validity, if known. Reference to where data collection forms can be found, if not in the protocol

|    |                        |                      |                                                          |
|----|------------------------|----------------------|----------------------------------------------------------|
| 1  |                        |                      |                                                          |
| 2  |                        |                      |                                                          |
| 3  |                        |                      |                                                          |
| 4  |                        |                      |                                                          |
| 5  |                        |                      |                                                          |
| 6  |                        |                      |                                                          |
| 7  |                        |                      |                                                          |
| 8  |                        |                      |                                                          |
| 9  |                        |                      |                                                          |
| 10 | Data collection plan:  | <a href="#">#18b</a> | Plans to promote participant retention and complete      |
| 11 | retention              |                      | follow-up, including list of any outcome data to be      |
| 12 |                        |                      | collected for participants who discontinue or deviate    |
| 13 |                        |                      | from intervention protocols                              |
| 14 |                        |                      |                                                          |
| 15 |                        |                      |                                                          |
| 16 |                        |                      |                                                          |
| 17 | Data management        | <a href="#">#19</a>  | Plans for data entry, coding, security, and storage,     |
| 18 |                        |                      | including any related processes to promote data          |
| 19 |                        |                      | quality (eg, double data entry; range checks for         |
| 20 |                        |                      | data values). Reference to where details of data         |
| 21 |                        |                      | management procedures can be found, if not in the        |
| 22 |                        |                      | protocol                                                 |
| 23 |                        |                      |                                                          |
| 24 |                        |                      |                                                          |
| 25 |                        |                      |                                                          |
| 26 |                        |                      |                                                          |
| 27 | Statistics: outcomes   | <a href="#">#20a</a> | Statistical methods for analysing primary and            |
| 28 |                        |                      | secondary outcomes. Reference to where other             |
| 29 |                        |                      | details of the statistical analysis plan can be found,   |
| 30 |                        |                      | if not in the protocol                                   |
| 31 |                        |                      |                                                          |
| 32 |                        |                      |                                                          |
| 33 |                        |                      |                                                          |
| 34 | Statistics: additional | <a href="#">#20b</a> | Methods for any additional analyses (eg, subgroup        |
| 35 | analyses               |                      | and adjusted analyses)                                   |
| 36 |                        |                      |                                                          |
| 37 | Statistics: analysis   | <a href="#">#20c</a> | Definition of analysis population relating to protocol   |
| 38 | population and         |                      | non-adherence (eg, as randomised analysis), and          |
| 39 | missing data           |                      | any statistical methods to handle missing data (eg,      |
| 40 |                        |                      | multiple imputation)                                     |
| 41 |                        |                      |                                                          |
| 42 |                        |                      |                                                          |
| 43 |                        |                      |                                                          |
| 44 | <b>Methods:</b>        |                      |                                                          |
| 45 | <b>Monitoring</b>      |                      |                                                          |
| 46 |                        |                      |                                                          |
| 47 |                        |                      |                                                          |
| 48 | Data monitoring:       | <a href="#">#21a</a> | Composition of data monitoring committee (DMC);          |
| 49 | formal committee       |                      | summary of its role and reporting structure;             |
| 50 |                        |                      | statement of whether it is independent from the          |
| 51 |                        |                      | sponsor and competing interests; and reference to        |
| 52 |                        |                      | where further details about its charter can be found,    |
| 53 |                        |                      | if not in the protocol. Alternatively, an explanation of |
| 54 |                        |                      | why a DMC is not needed                                  |
| 55 |                        |                      |                                                          |
| 56 |                        |                      |                                                          |
| 57 |                        |                      |                                                          |
| 58 |                        |                      |                                                          |
| 59 |                        |                      |                                                          |
| 60 |                        |                      |                                                          |

|    |                      |                      |                                                         |      |
|----|----------------------|----------------------|---------------------------------------------------------|------|
| 1  | Data monitoring:     | <a href="#">#21b</a> | Description of any interim analyses and stopping        | n.a. |
| 2  | interim analysis     |                      | guidelines, including who will have access to these     |      |
| 3  |                      |                      | interim results and make the final decision to          |      |
| 4  |                      |                      | terminate the trial                                     |      |
| 5  |                      |                      |                                                         |      |
| 6  |                      |                      |                                                         |      |
| 7  |                      |                      |                                                         |      |
| 8  | Harms                | <a href="#">#22</a>  | Plans for collecting, assessing, reporting, and         | 14   |
| 9  |                      |                      | managing solicited and spontaneously reported           |      |
| 10 |                      |                      | adverse events and other unintended effects of trial    |      |
| 11 |                      |                      | interventions or trial conduct                          |      |
| 12 |                      |                      |                                                         |      |
| 13 |                      |                      |                                                         |      |
| 14 | Auditing             | <a href="#">#23</a>  | Frequency and procedures for auditing trial             | 18   |
| 15 |                      |                      | conduct, if any, and whether the process will be        |      |
| 16 |                      |                      | independent from investigators and the sponsor          |      |
| 17 |                      |                      |                                                         |      |
| 18 |                      |                      |                                                         |      |
| 19 |                      |                      |                                                         |      |
| 20 | <b>Ethics and</b>    |                      |                                                         |      |
| 21 | <b>dissemination</b> |                      |                                                         |      |
| 22 |                      |                      |                                                         |      |
| 23 |                      |                      |                                                         |      |
| 24 | Research ethics      | <a href="#">#24</a>  | Plans for seeking research ethics committee /           | 21   |
| 25 | approval             |                      | institutional review board (REC / IRB) approval         |      |
| 26 |                      |                      |                                                         |      |
| 27 | Protocol             | <a href="#">#25</a>  | Plans for communicating important protocol              | 21   |
| 28 | amendments           |                      | modifications (eg, changes to eligibility criteria,     |      |
| 29 |                      |                      | outcomes, analyses) to relevant parties (eg,            |      |
| 30 |                      |                      | investigators, REC / IRBs, trial participants, trial    |      |
| 31 |                      |                      | registries, journals, regulators)                       |      |
| 32 |                      |                      |                                                         |      |
| 33 |                      |                      |                                                         |      |
| 34 |                      |                      |                                                         |      |
| 35 |                      |                      |                                                         |      |
| 36 | Consent or assent    | <a href="#">#26a</a> | Who will obtain informed consent or assent from         | 21   |
| 37 |                      |                      | potential trial participants or authorised surrogates,  |      |
| 38 |                      |                      | and how (see Item 32)                                   |      |
| 39 |                      |                      |                                                         |      |
| 40 |                      |                      |                                                         |      |
| 41 | Consent or assent:   | <a href="#">#26b</a> | Additional consent provisions for collection and use    | n.a. |
| 42 | ancillary studies    |                      | of participant data and biological specimens in         |      |
| 43 |                      |                      | ancillary studies, if applicable                        |      |
| 44 |                      |                      |                                                         |      |
| 45 |                      |                      |                                                         |      |
| 46 | Confidentiality      | <a href="#">#27</a>  | How personal information about potential and            | 22   |
| 47 |                      |                      | enrolled participants will be collected, shared, and    |      |
| 48 |                      |                      | maintained in order to protect confidentiality before,  |      |
| 49 |                      |                      | during, and after the trial                             |      |
| 50 |                      |                      |                                                         |      |
| 51 |                      |                      |                                                         |      |
| 52 |                      |                      |                                                         |      |
| 53 | Declaration of       | <a href="#">#28</a>  | Financial and other competing interests for principal   | 22   |
| 54 | interests            |                      | investigators for the overall trial and each study site |      |
| 55 |                      |                      |                                                         |      |
| 56 |                      |                      |                                                         |      |
| 57 | Data access          | <a href="#">#29</a>  | Statement of who will have access to the final trial    | 22   |
| 58 |                      |                      | dataset, and disclosure of contractual agreements       |      |
| 59 |                      |                      |                                                         |      |
| 60 |                      |                      |                                                         |      |

that limit such access for investigators

|    |                       |                      |                                                          |               |
|----|-----------------------|----------------------|----------------------------------------------------------|---------------|
| 1  |                       |                      |                                                          |               |
| 2  | Ancillary and post    | <a href="#">#30</a>  | Provisions, if any, for ancillary and post-trial care,   | n.a.          |
| 3  | trial care            |                      | and for compensation to those who suffer harm            |               |
| 4  |                       |                      | from trial participation                                 |               |
| 5  |                       |                      |                                                          |               |
| 6  |                       |                      |                                                          |               |
| 7  | Dissemination policy: | <a href="#">#31a</a> | Plans for investigators and sponsor to communicate       | 23            |
| 8  | trial results         |                      | trial results to participants, healthcare professionals, |               |
| 9  |                       |                      | the public, and other relevant groups (eg, via           |               |
| 10 |                       |                      | publication, reporting in results databases, or other    |               |
| 11 |                       |                      | data sharing arrangements), including any                |               |
| 12 |                       |                      | publication restrictions                                 |               |
| 13 |                       |                      |                                                          |               |
| 14 | Dissemination policy: | <a href="#">#31b</a> | Authorship eligibility guidelines and any intended       | 23            |
| 15 | authorship            |                      | use of professional writers                              |               |
| 16 |                       |                      |                                                          |               |
| 17 | Dissemination policy: | <a href="#">#31c</a> | Plans, if any, for granting public access to the full    | 22            |
| 18 | reproducible          |                      | protocol, participant-level dataset, and statistical     |               |
| 19 | research              |                      | code                                                     |               |
| 20 |                       |                      |                                                          |               |
| 21 |                       |                      |                                                          |               |
| 22 |                       |                      |                                                          |               |
| 23 |                       |                      |                                                          |               |
| 24 |                       |                      |                                                          |               |
| 25 |                       |                      |                                                          |               |
| 26 |                       |                      |                                                          |               |
| 27 | <b>Appendices</b>     |                      |                                                          |               |
| 28 |                       |                      |                                                          |               |
| 29 | Informed consent      | <a href="#">#32</a>  | Model consent form and other related                     | Supplementary |
| 30 | materials             |                      | documentation given to participants and authorised       | file          |
| 31 |                       |                      | surrogates                                               |               |
| 32 |                       |                      |                                                          |               |
| 33 |                       |                      |                                                          |               |
| 34 | Biological specimens  | <a href="#">#33</a>  | Plans for collection, laboratory evaluation, and         | n.a.          |
| 35 |                       |                      | storage of biological specimens for genetic or           |               |
| 36 |                       |                      | molecular analysis in the current trial and for future   |               |
| 37 |                       |                      | use in ancillary studies, if applicable                  |               |
| 38 |                       |                      |                                                          |               |
| 39 |                       |                      |                                                          |               |
| 40 |                       |                      |                                                          |               |

None The SPIRIT checklist is distributed under the terms of the Creative Commons Attribution License CC-BY-ND 3.0. This checklist can be completed online using <https://www.goodreports.org/>, a tool made by the [EQUATOR Network](#) in collaboration with [Penelope.ai](#)
